# Supplementary material for: Organic photoredox catalyzed C–H silylation of quinoxalinones or electron-deficient heteroarenes under ambient air conditions
Source: Royal Society of Chemistry journal article supplement (doi:10.1039/d0gc03697h), 2020-12-12

## Electronic Supplementary Information

for

### Organic photoredox catalyzed C–H silylation of quinoxalinones or electron-deficient heteroarenes under ambient air conditions

Changhui Dai, Yanling Zhan, Ping Liu\* and Peipei Sun\*

*School of Chemistry and Materials Science, Jiangsu Provincial Key Laboratory of Material Cycle  
Processes and Pollution Control, Jiangsu Collaborative Innovation Center of Biomedical  
Functional Materials, Nanjing Normal University, Nanjing 210023, China*  
*pingliu@njnu.edu.cn; sunpeipei@njnu.edu.cn*

#### Contents

|                                                                                        |         |
|----------------------------------------------------------------------------------------|---------|
| 1 General information.....                                                             | S2      |
| 2. Reaction optimization.....                                                          | S2-S3   |
| 3 Experimental procedures.....                                                         | S3-S4   |
| 4 Failed substrates.....                                                               | S5-S6   |
| 5 Mechanistic studies.....                                                             | S6-S9   |
| 6 Experimental data for the products <b>3</b> , <b>5</b> , <b>6</b> and <b>7</b> ..... | S10-S24 |
| 7 References.....                                                                      | S24     |
| 8 <sup>1</sup> H and <sup>13</sup> C NMR spectra of the products.....                  | S25-S63 |

## 1 General information

All reagents were obtained from commercial suppliers and used without further purification. Reactions were monitored by thin layer chromatography. Column chromatography was performed using silica gel (300–400 mesh). The NMR spectra were recorded on a Bruker Avance 400 spectrometer at 400 MHz ( $^1\text{H}$ ) and 100 MHz ( $^{13}\text{C}$ ) in  $\text{CDCl}_3$  or  $\text{DMSO-}d_6$  using tetramethylsilane as the internal standard. The following abbreviations were used to explain the multiplicities: s = singlet, d = doublet, dd = doublet of doublet, t = triplet, m = multiplet, q = quartet. High-resolution mass spectra were obtained with an AB Triple 5600 mass spectrometer by ESI on a TOF mass analyzer. Melting points are uncorrected.

## 2. Reaction optimization

**Table S1** Optimization of the reaction conditions<sup>a</sup>

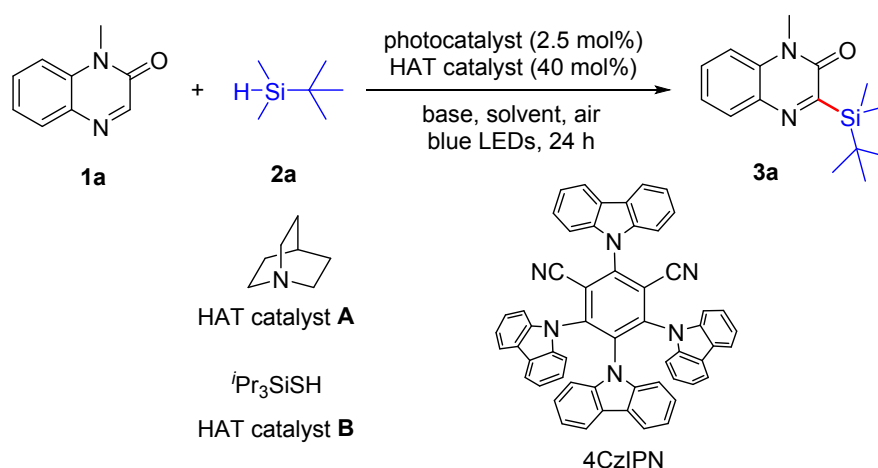

| Entry | Photocatalyst                                                             | Base (equiv.)               | Solvent                | Yield <sup>b</sup> (%) |
|-------|---------------------------------------------------------------------------|-----------------------------|------------------------|------------------------|
| 1     | $\text{Ir}[\text{dF}(\text{CF}_3)\text{ppy}]_2(\text{dtbbpy})\text{PF}_6$ | $\text{K}_2\text{CO}_3$ (1) | DMSO                   | <10                    |
| 2     | $\text{Ir}[\text{dF}(\text{CF}_3)\text{ppy}]_2(\text{dtbbpy})\text{PF}_6$ | $\text{K}_2\text{CO}_3$ (1) | DMF                    | trace                  |
| 3     | $\text{Ir}[\text{dF}(\text{CF}_3)\text{ppy}]_2(\text{dtbbpy})\text{PF}_6$ | $\text{K}_2\text{CO}_3$ (1) | $t\text{BuOH}$         | 0                      |
| 4     | $\text{Ir}[\text{dF}(\text{CF}_3)\text{ppy}]_2(\text{dtbbpy})\text{PF}_6$ | $\text{K}_2\text{CO}_3$ (1) | THF                    | trace                  |
| 5     | $\text{Ir}[\text{dF}(\text{CF}_3)\text{ppy}]_2(\text{dtbbpy})\text{PF}_6$ | $\text{K}_2\text{CO}_3$ (1) | DCM                    | 0                      |
| 6     | $\text{Ir}[\text{dF}(\text{CF}_3)\text{ppy}]_2(\text{dtbbpy})\text{PF}_6$ | $\text{K}_2\text{CO}_3$ (1) | 1,4-dioxene            | 0                      |
| 7     | $\text{Ir}[\text{dF}(\text{CF}_3)\text{ppy}]_2(\text{dtbbpy})\text{PF}_6$ | $\text{K}_2\text{CO}_3$ (1) | DCE                    | trace                  |
| 8     | $\text{Ir}[\text{dF}(\text{CF}_3)\text{ppy}]_2(\text{dtbbpy})\text{PF}_6$ | $\text{K}_2\text{CO}_3$ (1) | acetone                | 25                     |
| 9     | $\text{Ir}[\text{dF}(\text{CF}_3)\text{ppy}]_2(\text{dtbbpy})\text{PF}_6$ | $\text{K}_2\text{CO}_3$ (1) | $\text{CH}_3\text{CN}$ | 31                     |
| 10    | $\text{Ir}(\text{ppy})_2(\text{dtbbpy})\text{PF}_6$                       | $\text{K}_2\text{CO}_3$ (1) | $\text{CH}_3\text{CN}$ | 0                      |
| 11    | 4CzIPN                                                                    | $\text{K}_2\text{CO}_3$ (1) | $\text{CH}_3\text{CN}$ | 47                     |

|                 |               |                                    |                                               |           |
|-----------------|---------------|------------------------------------|-----------------------------------------------|-----------|
| 12              | none          | K <sub>2</sub> CO <sub>3</sub> (1) | CH <sub>3</sub> CN                            | 0         |
| 13 <sup>c</sup> | 4CzIPN        | K <sub>2</sub> CO <sub>3</sub> (1) | CH <sub>3</sub> CN                            | trace     |
| 14 <sup>d</sup> | 4CzIPN        | K <sub>2</sub> CO <sub>3</sub> (1) | CH <sub>3</sub> CN                            | 31        |
| 15 <sup>e</sup> | 4CzIPN        | K <sub>2</sub> CO <sub>3</sub> (1) | CH <sub>3</sub> CN                            | 41        |
| 16              | 4CzIPN        | none                               | CH <sub>3</sub> CN                            | 0         |
| 17              | 4CzIPN        | DBU (1)                            | CH <sub>3</sub> CN                            | 41        |
| 18              | 4CzIPN        | CsCO <sub>3</sub> (1)              | CH <sub>3</sub> CN                            | 32        |
| 19              | 4CzIPN        | 2,4,6-Collidine (1)                | CH <sub>3</sub> CN                            | 52        |
| 20              | 4CzIPN        | Et <sub>3</sub> N (1)              | CH <sub>3</sub> CN                            | 0         |
| 21              | 4CzIPN        | Pyridine (1)                       | CH <sub>3</sub> CN                            | 65        |
| 22              | 4CzIPN        | Pyridine (0.5)                     | CH <sub>3</sub> CN                            | 50        |
| 23              | 4CzIPN        | Pyridine (2)                       | CH <sub>3</sub> CN                            | 73        |
| 24              | 4CzIPN        | Pyridine (4)                       | CH <sub>3</sub> CN                            | 63        |
| 25 <sup>f</sup> | 4CzIPN        | Pyridine (2)                       | CH <sub>3</sub> CN                            | 0         |
| 26 <sup>g</sup> | 4CzIPN        | Pyridine (2)                       | CH <sub>3</sub> CN                            | 0         |
| 27              | 4CzIPN        | Pyridine (2)                       | CH <sub>3</sub> CN:H <sub>2</sub> O (3:1 v/v) | 30        |
| 28              | 4CzIPN        | Pyridine (2)                       | DMSO:CH <sub>3</sub> CN (1:3, v/v)            | 74        |
| <b>29</b>       | <b>4CzIPN</b> | <b>Pyridine (2)</b>                | <b>DMSO:CH<sub>3</sub>CN (3:1, v/v)</b>       | <b>77</b> |
| 30 <sup>h</sup> | 4CzIPN        | Pyridine (2)                       | DMSO:CH <sub>3</sub> CN (3:1, v/v)            | 55        |
| 31 <sup>i</sup> | 4CzIPN        | Pyridine (2)                       | DMSO:CH <sub>3</sub> CN (3:1, v/v)            | 78        |

<sup>a</sup>Reaction conditions: **1a** (0.2 mmol, 1.0 equiv.), **2a** (1.0 mmol, 5.0 equiv.), photocatalyst (2.5 mol%), HAT catalyst (40 mol%), base and solvent (4 mL) were stirred under irradiation (12 W blue LEDs) at room temperature under open air, 24 h. <sup>b</sup>Isolated yield based on **1a**. <sup>c</sup>Triisopropylsilylthiol (**B**) was used as the HAT catalyst. <sup>d</sup>HAT catalyst A (20 mol%). <sup>e</sup>HAT catalyst A (30 mol%). <sup>f</sup>Without light. <sup>g</sup>Under Ar (1 atm). <sup>h</sup>12 h. <sup>i</sup>36 h.

### 3 Experimental procedures

#### 3.1 General procedure for the preparation of **3**, **5** and **6**

To a tube were added quinoxalin-2(1*H*)-ones **1** (0.2 mmol, 1.0 equiv.), silanes (1.0 mmol, 5.0 equiv), 4CzIPN (4.0 mg, 0.005 mmol, 2.5 mol%), quinuclidine (9.1 mg, 0.08 mmol, 40 mol%), pyridine (32  $\mu$ L, 0.4 mmol, 2.0 equiv.) and DMSO/CH<sub>3</sub>CN (3:1, 4 mL). The reaction mixture was stirred under irradiation (12 W blue LEDs) at room temperature in the presence of open air for 24 h. The resulting solution was diluted with brine (20 mL) and extracted with EtOAc (3  $\times$  15 mL). The combined organic layers were dried over Na<sub>2</sub>SO<sub>4</sub> and concentrated in vacuum. The resulting residue was purified by silica gel column chromatography with petroleum ether/ethyl acetate as eluent to afford the desired products **3**, **5** or **6**.

#### 3.2 Gram-scale synthesis of **3a**

To a tube were added 1-methylquinoxalin-2(1*H*)-one (0.96 g, 6.0 mmol, 1.0 equiv), *tert*-butyldimethylsilane (4.95 mL, 30.0 mmol, 5.0 equiv), 4CzIPN (118.3 mg, 0.15 mmol, 2.5 mol%), quinuclidine (266.7 mg, 2.4 mmol, 40 mol%), pyridine (384  $\mu$ L, 12 mmol, 2.0 equiv) and CH<sub>3</sub>CN (30 mL). The reaction mixture was stirred under irradiation (2  $\times$  30 W blue LEDs) at room temperature in the presence of open air for 60 h. The resulting solution was diluted with brine (50 mL) and extracted with EtOAc (3  $\times$  50 mL). The combined organic layers were dried over Na<sub>2</sub>SO<sub>4</sub> and concentrated in vacuum, and the resulting residue was purified by silica gel column chromatography with petroleum ether/ethyl acetate as eluent to afford the desired product **3a** (1.04 g, 63%).

### 3.3 General procedure for the preparation of **7**

A mixture of 1-methylquinoxalin-2(1*H*)-one **3a** (64.0 mg, 0.4 mmol, 1.0 equiv.), PhI(OAc)<sub>2</sub> (193.3 mg, 0.6 mmol, 1.5 equiv.), and Pd(OAc)<sub>2</sub> (4.5 mg, 0.02 mmol, 5 mol%) in AcOH (1.0 mL) was stirred at 100 °C for 24 h, followed by the addition of water (1 mL) and heating at 100 °C for another 24 h. After cooling to room temperature, the reaction mixture was poured into aqueous NaHCO<sub>3</sub> solution (20 mL) and extract with CH<sub>2</sub>Cl<sub>2</sub> (3  $\times$  20 mL). The combined organic layers were dried over anhydrous Na<sub>2</sub>SO<sub>4</sub>, and concentrated under a reduced pressure. The residue was purified by column chromatography on silica gel with methane dichloride/ethyl acetate (1:1) as eluent to afford the product **7** (37.0 mg, 53% yield, yellow solid).

## 4 Failed substrates

Some substrates did not yield desired products under standard reaction conditions.

### Failed examples

#### 1. heteroarenes

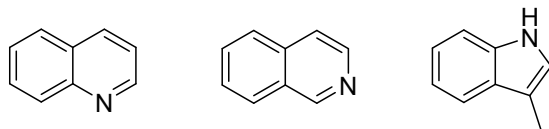

#### 2. silanes

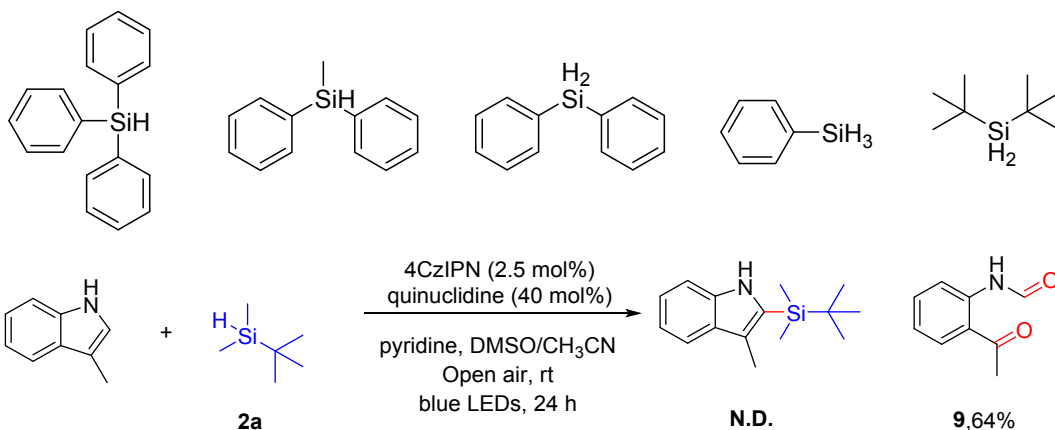

To a tube were added 3-methyl-1*H*-indole (26.4 mg, 0.2 mmol, 1.0 equiv.), **2a** (165  $\mu$ L, 1.0 mmol, 5.0 equiv.), 4CzIPN (3.94 mg, 0.005 mmol, 2.5 mol%), quinuclidine (9.1 mg, 0.08 mmol, 40 mol%), pyridine (32  $\mu$ L, 0.4 mmol, 2.0 equiv.) and DMSO/CH<sub>3</sub>CN (3:1, 4 mL). The reaction mixture was stirred under irradiation (12 W blue LEDs) at room temperature in the presence of open air for 24 h. After the reaction was stopped, no desired product was detected. The byproduct *N*-(2-acetylphenyl)formamide (**9**) was obtained in 64% yield.

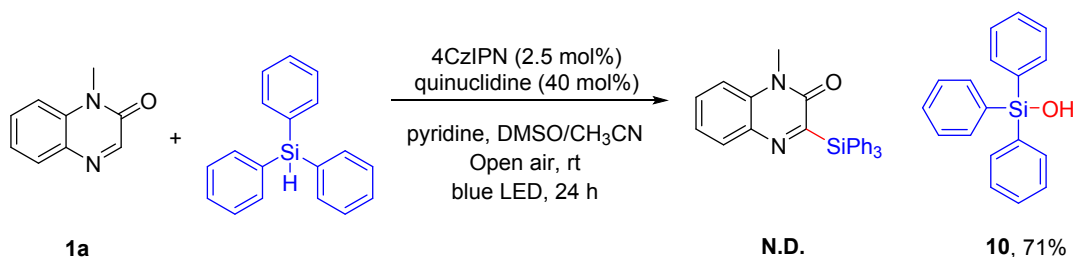

To a tube were added **1a** (32.0 mg, 0.2 mmol, 1.0 equiv.), triphenylsilane (260.4 mg, 1.0 mmol, 5.0 equiv.), 4CzIPN (3.94 mg, 0.005 mmol, 2.5 mol%), quinuclidine (9.1 mg, 0.08 mmol, 40 mol%), pyridine (32  $\mu$ L, 0.4 mmol, 2.0 equiv.) and DMSO/CH<sub>3</sub>CN (3:1, 4 mL). The reaction mixture was stirred under irradiation (12 W blue LEDs) at room temperature in the presence of

open air for 24 h. After the reaction was stopped, no desired product was detected. The byproduct triphenylsilanol (**10**) was obtained in 71% yield (isolated yield based on triphenylsilane). Meanwhile, the byproduct **10** was observed through the GC-MS analysis from the reaction solution (Figure S1).

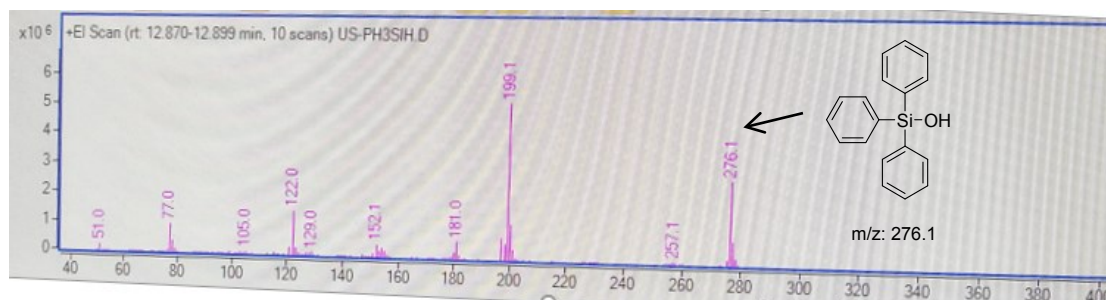

**Figure S1** GC-MS analysis of the byproduct **10**.

## 5 Mechanistic studies

### 5.1 The LC-MS study of byproducts in the model reaction

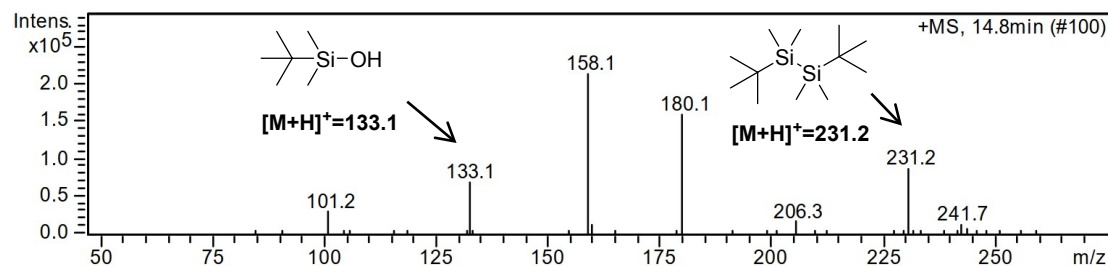

**Figure S2** LC-MS analysis of the model reaction.

The model reaction solution was directly used for LC-MS analysis. The formation of *tert*-butyldimethylsilanol and 1,2-di-*tert*-butyl-1,1,2,2-tetramethyldisilane were observed by LC-MS, which indicated that *tert*-butyldimethylsilyl radical was formed in this process.

### 5.2 Stern-Volmer quenching experiments

Ex: 363 nm, Em: 430 nm–710 nm, PMT voltage: 750 V. Fluorescence studies were operated on an F-7100 fluorescence spectrophotometer (Hitachi).

| 4CzIPN    | Quinuclidine (HAT)-quencher | Ratio (4CzIPN : Quinuclidine) |
|-----------|-----------------------------|-------------------------------|
| 0.00001 M | 0.001 M                     | 1:100                         |
| 0.00001 M | 0.002 M                     | 1:200                         |

|           |         |       |
|-----------|---------|-------|
| 0.00001 M | 0.004 M | 1:400 |
| 0.00001 M | 0.006 M | 1:600 |
| 0.00001 M | 0.008 M | 1:800 |

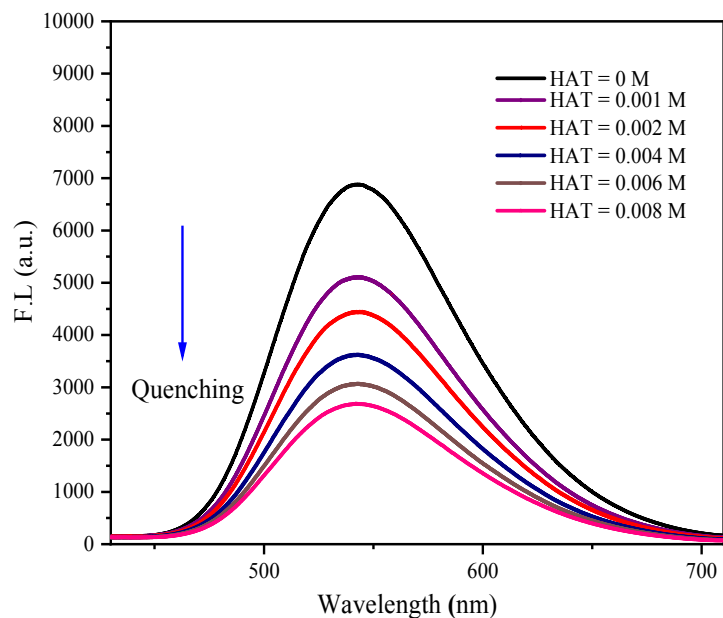

**Fig. S3** Emission spectra of 4CzIPN at different concentration of quinuclidine

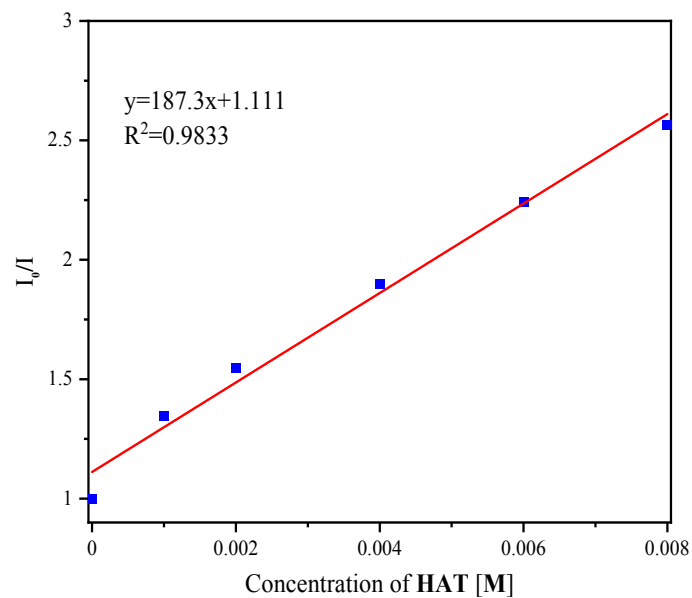

**Fig. S4** Stern-Volmer plot of 4CzIPN at different concentrations of quinuclidine

### 5.3 The radical quenching and trapping experiments

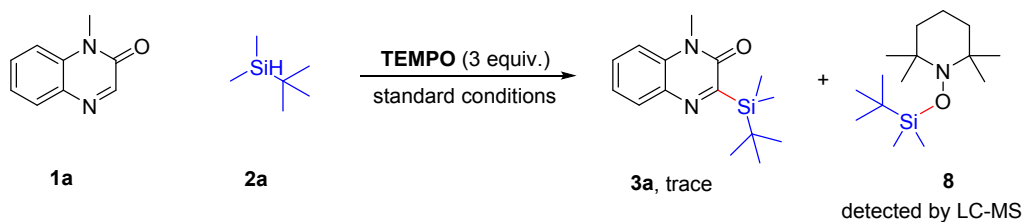

To a tube were added **1a** (32.0 mg, 0.2 mmol, 1.0 equiv.), **2a** (165  $\mu$ L, 1.0 mmol, 5.0 equiv.), 4CzIPN (3.94 mg, 0.005 mmol, 2.5 mol%), quinuclidine (9.1 mg, 0.08 mmol, 40 mol%), pyridine (32  $\mu$ L, 0.4 mmol, 2.0 equiv.), TEMPO (94.5 mg, 0.6 mmol, 3.0 equiv.) and DMSO/CH<sub>3</sub>CN (3:1, 4 mL). The reaction mixture was stirred under irradiation (12 W blue LED) at room temperature in the presence of open air for 24 h. After the reaction was stopped, no desired product **3a** was detected by TLC and LC-MS, indicating that the reaction was completely inhibited. Meanwhile, a trapping product **8** was observed through the LC-MS analysis from the reaction solution (Figure S5).

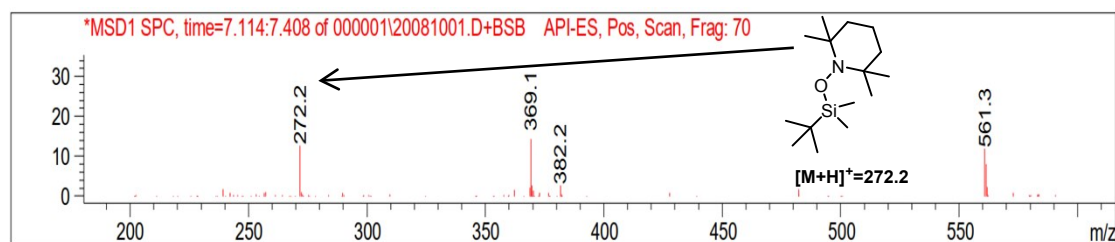

**Figure S5** LC-MS analysis of the radical-trapping product **8**.

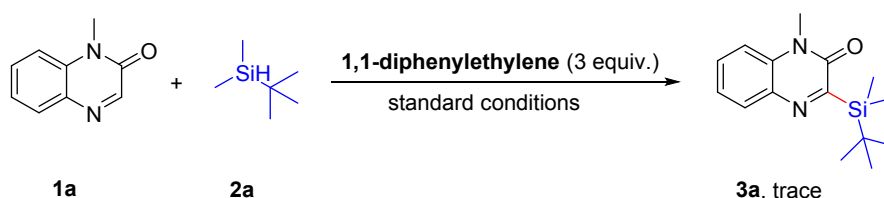

To a tube were added **1a** (32.0 mg, 0.2 mmol, 1.0 equiv.), **2a** (165  $\mu$ L, 1.0 mmol, 5.0 equiv.), 4CzIPN (3.94 mg, 0.005 mmol, 2.5 mol%), quinuclidine (9.1 mg, 0.08 mmol, 40 mol%), pyridine (32  $\mu$ L, 0.4 mmol, 2.0 equiv.), 1,1-diphenylethylene (106  $\mu$ L, 0.6 mmol, 3.0 equiv.) and DMSO/CH<sub>3</sub>CN (3:1, 4 mL). The reaction mixture was stirred under irradiation (12 W blue LED) at room temperature in the presence of open air for 24 h. The reaction was completely inhibited, indicating that a radical process might be involved in the catalytic cycle.

#### 5.4 Kinetic isotope effect experiment



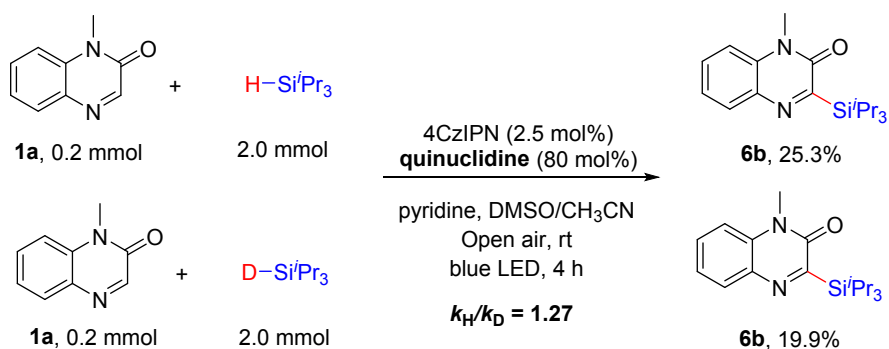

Triisopropylsilane-*d* was prepared according to the procedures of literature.<sup>1</sup> To a tube were added **1a** (32.0 mg, 0.2 mmol, 1.0 equiv.), triisopropylsilane or triisopropylsilane-*d* (410  $\mu\text{L}$ , 2.0 mmol, 10.0 equiv.), 4CzIPN (4.0 mg, 0.005 mmol, 2.5 mol%), quinuclidine (18.2 mg, 0.16 mmol, 80 mol%), pyridine (32  $\mu\text{L}$ , 0.4 mmol, 2.0 equiv.) and DMSO/CH<sub>3</sub>CN (3:1, 4 mL). The reaction mixture was stirred under irradiation (12 W blue LEDs) at room temperature in the presence of open air for 4 h. The two reaction mixtures were separately isolated by flash silica gel column chromatography (petroleum ether/EtOAc = 30/1) to give **6b** in 25.3% and 19.9% yields, respectively. The value of  $k_{\text{H}}/k_{\text{D}}$  (1.27) from two parallel reactions indicated that Si-H bond cleavage might not be the kinetically rate-determining step in this reaction.

## 6 Experimental data for the products 3, 5, 6 and 7

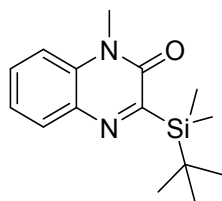

**3-(*tert*-Butyldimethylsilyl)-1-methylquinoxalin-2(1*H*)-one (3a).** The product was purified by silica gel column chromatography with petroleum ether/ethyl acetate (20:1, v/v). Yellow solid (42.2 mg, 77% yield). mp 81–83 °C. <sup>1</sup>H NMR (400 MHz, CDCl<sub>3</sub>) δ (ppm) 7.94 (dd, *J* = 8.0, 1.6 Hz, 1H), 7.55–7.51 (m, 1H), 7.34–7.27 (m, 2H), 3.64 (s, 3H), 1.05 (s, 9H), 0.41 (s, 6H). <sup>13</sup>C NMR (100 MHz, CDCl<sub>3</sub>) δ (ppm) 172.0, 157.0, 134.3, 132.9, 130.8, 130.5, 123.0, 113.5, 28.4, 27.1, 17.7, -5.6. HRMS (ESI) *m/z*: [M + H]<sup>+</sup> Calcd for C<sub>15</sub>H<sub>23</sub>N<sub>2</sub>O<sup>+</sup>Si 275.1574; Found 275.1579.

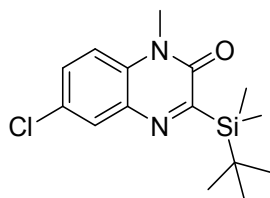

**3-(*tert*-Butyldimethylsilyl)-6-chloro-1-methylquinoxalin-2(1*H*)-one (3b).** The product was purified by silica gel column chromatography with petroleum ether/ethyl acetate (20:1, v/v). Yellow solid (44.4 mg, 72% yield). mp 112–114 °C. <sup>1</sup>H NMR (400 MHz, CDCl<sub>3</sub>) δ (ppm) 7.93 (d, *J* = 2.4 Hz, 1H), 7.48 (dd, *J* = 8.9, 2.4 Hz, 1H), 7.22 (d, *J* = 8.9 Hz, 1H), 3.63 (s, 3H), 1.03 (s, 9H), 0.39 (s, 6H). <sup>13</sup>C NMR (100 MHz, CDCl<sub>3</sub>) δ (ppm) 174.0, 156.6, 134.6, 131.6, 130.4, 130.1, 128.4, 114.7, 28.5, 27.0, 17.7, -5.7. HRMS (ESI) *m/z*: [M + H]<sup>+</sup> Calcd for C<sub>15</sub>H<sub>22</sub>ClN<sub>2</sub>O<sup>+</sup>Si 309.1184; Found 309.1182.

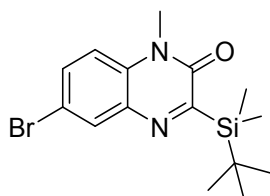

**6-Bromo-3-(*tert*-butyldimethylsilyl)-1-methylquinoxalin-2(1*H*)-one (3c).** The product was purified by silica gel column chromatography with petroleum ether/ethyl acetate (20:1, v/v). Yellow solid (33.1 mg, 47% yield). mp 109–111 °C. <sup>1</sup>H NMR (400 MHz, CDCl<sub>3</sub>) δ (ppm) 8.11 (d, *J* = 2.4 Hz, 1H), 7.63 (dd, *J* = 8.8, 2.3 Hz, 1H), 7.18 (d, *J* = 8.9 Hz, 1H), 3.63 (s, 3H), 1.03 (s, 9H),

0.40 (s, 6H).  $^{13}\text{C}$  NMR (100 MHz,  $\text{CDCl}_3$ )  $\delta$  (ppm) 174.0, 156.6, 134.9, 133.2, 133.1, 132.1, 115.6, 115.0, 28.5, 27.0, 17.7, -5.7. HRMS (ESI)  $m/z$ :  $[\text{M} + \text{H}]^+$  Calcd for  $\text{C}_{15}\text{H}_{22}\text{BrN}_2\text{OSi}^+$  353.0679; Found 353.0682.

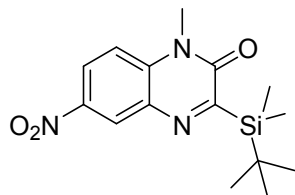

**3-(*tert*-Butyldimethylsilyl)-1-methyl-6-nitroquinoxalin-2(1*H*)-one (3d).** The product was purified by silica gel column chromatography with petroleum ether/ethyl acetate (20:1, v/v). Yellow solid (25.5 mg, 40% yield). mp 187–189 °C.  $^1\text{H}$  NMR (400 MHz,  $\text{CDCl}_3$ )  $\delta$  (ppm) 8.81–8.80 (m, 1H), 8.40 (dd,  $J = 9.2, 2.6$  Hz, 1H), 7.40 (d,  $J = 9.2$  Hz, 1H), 3.70 (s, 3H), 1.04 (s, 9H), 0.41 (s, 6H).  $^{13}\text{C}$  NMR (100 MHz,  $\text{CDCl}_3$ )  $\delta$  (ppm) 175.9, 156.4, 142.9, 137.7, 133.0, 126.4, 125.0, 114.2, 29.0, 27.0, 17.7, -5.7. HRMS (ESI)  $m/z$ :  $[\text{M} + \text{H}]^+$  Calcd for  $\text{C}_{15}\text{H}_{22}\text{N}_3\text{O}_3\text{Si}^+$  320.1425; Found 320.1424.

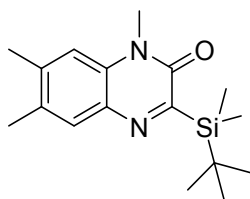

**3-(*tert*-Butyldimethylsilyl)-1,6,7-trimethylquinoxalin-2(1*H*)-one (3e).** The product was purified by silica gel column chromatography with petroleum ether/ethyl acetate (20:1, v/v). Yellow solid (46.5 mg, 77% yield). mp 89–91 °C.  $^1\text{H}$  NMR (400 MHz,  $\text{CDCl}_3$ )  $\delta$  (ppm) 7.72 (s, 1H), 7.06 (s, 1H), 3.63 (s, 3H), 2.43 (s, 3H), 2.36 (s, 3H), 1.04 (s, 9H), 0.40 (s, 6H).  $^{13}\text{C}$  NMR (100 MHz,  $\text{CDCl}_3$ )  $\delta$  (ppm) 170.0, 157.2, 140.4, 132.9, 131.9, 130.9, 130.9, 114.0, 28.3, 27.1, 20.6, 19.1, 17.7, -5.5. HRMS (ESI)  $m/z$ :  $[\text{M} + \text{H}]^+$  Calcd for  $\text{C}_{17}\text{H}_{26}\text{N}_2\text{OSi}^+$  303.1887; Found 303.1888.

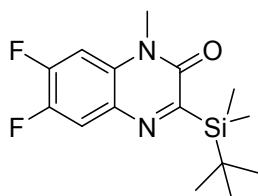

**3-(*tert*-Butyldimethylsilyl)-6,7-difluoro-1-methylquinoxalin-2(1*H*)-one (3f).** The product was purified by silica gel column chromatography with petroleum ether/ethyl acetate (20:1, v/v).

Yellow solid (40.3 mg, 65% yield). mp 92–93 °C. <sup>1</sup>H NMR (400 MHz, CDCl<sub>3</sub>) δ (ppm) 7.77–7.73 (m, 1H), 7.11–7.06 (m, 1H), 3.60 (s, 3H), 1.02 (s, 9H), 0.38 (s, 6H). <sup>13</sup>C NMR (100 MHz, CDCl<sub>3</sub>) δ (ppm) 172.9 (d, *J* = 3.6 Hz), 156.5, 151.7 (dd, *J* = 253.6, 14.4 Hz), 146.3 (dd, *J* = 246.6, 14.0 Hz), 130.5 (dd, *J* = 9.0, 2.9 Hz), 130.2 (dd, *J* = 9.1, 1.8 Hz), 118.3 (dd, *J* = 17.5, 2.3 Hz), 102.0 (d, *J* = 22.9 Hz), 28.9, 27.0, 17.6, -5.7. HRMS (ESI) *m/z*: [M + H]<sup>+</sup> Calcd for C<sub>15</sub>H<sub>21</sub>F<sub>2</sub>N<sub>2</sub>OSi<sup>+</sup> 311.1386; Found 311.1383.

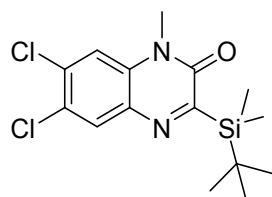

**3-(*tert*-Butyl dimethylsilyl)-6,7-dichloro-1-methylquinoxalin-2(1H)-one (3g).** The product was purified by silica gel column chromatography with petroleum ether/ethyl acetate (20:1, v/v). Yellow solid (43.8 mg, 64% yield). mp 121–123 °C. <sup>1</sup>H NMR (400 MHz, CDCl<sub>3</sub>) δ (ppm) 8.01 (t, *J* = 1.4 Hz, 1H), 7.37 (s, 1H), 3.60 (s, 3H), 1.02 (s, 9H), 0.39 (s, 6H). <sup>13</sup>C NMR (100 MHz, CDCl<sub>3</sub>) δ (ppm) 174.3, 156.3, 134.5, 133.1, 132.4, 131.5, 126.8, 115.0, 28.2, 27.0, 17.7, -5.7. HRMS (ESI) *m/z*: [M + H]<sup>+</sup> Calcd for C<sub>15</sub>H<sub>21</sub>Cl<sub>2</sub>N<sub>2</sub>OSi<sup>+</sup> 343.0795; Found 343.0796.

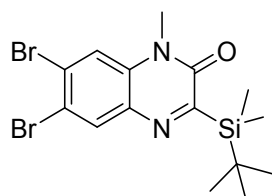

**6,7-Dibromo-3-(*tert*-butyl dimethylsilyl)-1-methylquinoxalin-2(1H)-one (3h).** The product was purified by silica gel column chromatography with petroleum ether/ethyl acetate (20:1, v/v). Yellow solid (26.8 mg, 31% yield). mp 181–183 °C. <sup>1</sup>H NMR (400 MHz, CDCl<sub>3</sub>) δ (ppm) 8.19 (s, 1H), 7.57 (s, 1H), 3.60 (s, 3H), 1.02 (s, 9H), 0.39 (s, 6H). <sup>13</sup>C NMR (100 MHz, CDCl<sub>3</sub>) δ (ppm) 174.6, 156.3, 134.7, 133.8, 132.9, 126.8, 118.2, 118.2, 28.6, 27.0, 17.7, -5.7. HRMS (ESI) *m/z*: [M + H]<sup>+</sup> Calcd for C<sub>15</sub>H<sub>21</sub>Br<sub>2</sub>N<sub>2</sub>OSi<sup>+</sup> 430.9784; Found 430.9786.

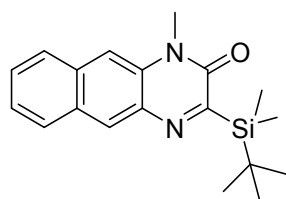

**3-(*tert*-Butyldimethylsilyl)-1-methylbenzo[*g*]quinoxalin-2(1*H*)-one (3i).** The product was purified by silica gel column chromatography with petroleum ether/ethyl acetate (3:1, v/v). Yellow solid (42.8 mg, 66% yield). mp 185–186 °C. <sup>1</sup>H NMR (400 MHz, CDCl<sub>3</sub>) δ (ppm) 8.42 (s, 1H), 7.95 (d, *J* = 8.2 Hz, 1H), 7.86 (d, *J* = 8.3 Hz, 1H), 7.55 (t, *J* = 6.9 Hz, 1H), 7.49–7.44 (m, 2H), 3.67 (s, 3H), 1.10 (s, 9H), 0.48 (s, 6H). <sup>13</sup>C NMR (100 MHz, CDCl<sub>3</sub>) δ (ppm) 173.3, 156.6, 133.9, 133.4, 131.4, 130.1, 129.4, 128.6, 127.9, 127.1, 125.1, 109.6, 28.3, 27.1, 17.7, -5.4. HRMS (ESI) *m/z*: [M + H]<sup>+</sup> Calcd for C<sub>19</sub>H<sub>25</sub>N<sub>2</sub>OSi<sup>+</sup> 325.1731; Found 325.1731.

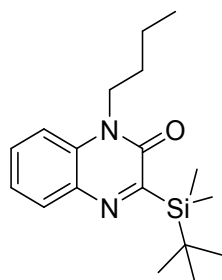

**1-Butyl-3-(*tert*-butyldimethylsilyl)quinoxalin-2(1*H*)-one (3j).** The product was purified by silica gel column chromatography with petroleum ether/ethyl acetate (20:1, v/v). Yellow oil (44.9 mg, 71% yield). <sup>1</sup>H NMR (400 MHz, CDCl<sub>3</sub>) δ (ppm) 7.95 (dd, *J* = 7.9, 1.6 Hz, 1H), 7.56–7.51 (m, 1H), 7.33–7.29 (m, 2H), 4.21–4.17 (m, 2H), 1.77–1.69 (m, 2H), 1.53–1.45 (m, 2H), 1.04 (s, 9H), 1.01 (d, *J* = 7.4 Hz, 3H), 0.41 (s, 6H). <sup>13</sup>C NMR (100 MHz, CDCl<sub>3</sub>) δ (ppm) 172.0, 156.7, 134.6, 132.1, 131.1, 130.4, 122.8, 113.5, 41.4, 29.3, 27.1, 20.4, 17.7, 13.9, -5.5. HRMS (ESI) *m/z*: [M + H]<sup>+</sup> Calcd for C<sub>18</sub>H<sub>29</sub>N<sub>2</sub>OSi<sup>+</sup> 317.2044; Found 317.2042.

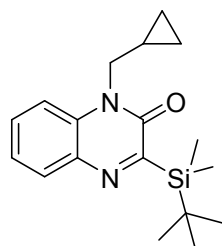

**1-(*tert*-Butyldimethylsilyl)-1-(cyclopropylmethyl)quinoxalin-2(1*H*)-one (3k).** The product was purified by silica gel column chromatography with petroleum ether/ethyl acetate (30:1, v/v). Light yellow oil (39.6 mg, 63% yield). <sup>1</sup>H NMR (400 MHz, CDCl<sub>3</sub>) δ (ppm) 7.95 (dd, *J* = 8.0, 1.6 Hz, 1H), 7.54–7.50 (m, 1H), 7.40 (d, *J* = 8.4 Hz, 1H), 7.31–7.28 (m, 1H), 4.15 (d, *J* = 7.0 Hz, 2H), 1.32–1.25 (m, 1H), 1.04 (s, 9H), 0.56–0.52 (m, 4H), 0.41 (s, 6H). <sup>13</sup>C NMR (100 MHz, CDCl<sub>3</sub>) δ

(ppm) 172.2, 156.9, 134.5, 132.3, 131.1, 130.4, 122.8, 113.7, 45.2, 27.1, 17.7, 9.8, 4.1, -5.6.

HRMS (ESI)  $m/z$ :  $[M + H]^+$  Calcd for  $C_{18}H_{27}N_2OSi^+$  315.1887; Found 315.1886.

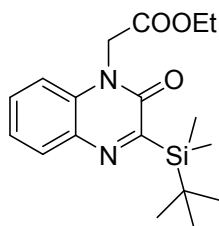

**Ethyl 2-(3-(*tert*-butyldimethylsilyl)-2-oxoquinoxalin-1(2*H*)-yl)acetate (31).** The product was purified by silica gel column chromatography with petroleum ether/ethyl acetate (20:1, v/v). Yellow solid (50.5 mg, 73% yield). mp 63–64 °C.  $^1H$  NMR (400 MHz,  $CDCl_3$ )  $\delta$  (ppm) 7.96 (dd,  $J = 8.0, 1.5$  Hz, 1H), 7.52–7.47 (m, 1H), 7.34–7.30 (m, 1H), 7.05 (dd,  $J = 8.4, 1.2$  Hz, 1H), 4.98 (s, 2H), 4.24 (q,  $J = 7.1$  Hz, 2H), 1.26 (t,  $J = 7.1$  Hz, 3H), 1.03 (s, 9H), 0.41 (s, 6H).  $^{13}C$  NMR (100 MHz,  $CDCl_3$ )  $\delta$  (ppm) 171.8, 167.3, 156.3, 134.3, 132.0, 131.2, 130.7, 123.4, 112.9, 62.0, 42.9, 27.0, 17.7, 14.1, -5.6. HRMS (ESI)  $m/z$ :  $[M + H]^+$  Calcd for  $C_{18}H_{27}N_2O_3Si^+$  347.1785; Found 347.1786.

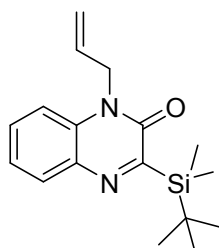

**1-Allyl-3-(*tert*-butyldimethylsilyl)quinoxalin-2(1*H*)-one (3m).** The product was purified by silica gel column chromatography with petroleum ether/ethyl acetate (30:1, v/v). Yellow oil (30.6 mg, 51% yield).  $^1H$  NMR (400 MHz,  $CDCl_3$ )  $\delta$  (ppm) 7.95 (dd,  $J = 8.0, 1.6$  Hz, 1H), 7.53–7.49 (m, 1H), 7.34–7.30 (m, 1H), 7.26 (dd,  $J = 8.4, 1.2$  Hz, 1H), 6.00–5.90 (m, 1H), 5.28–5.24 (m, 1H), 5.17–5.11 (m, 1H), 4.87–4.85 (m, 2H), 1.04 (s, 9H), 0.42 (s, 6H).  $^{13}C$  NMR (100 MHz,  $CDCl_3$ )  $\delta$  (ppm) 172.1, 156.5, 134.5, 132.1, 130.9, 130.4, 123.0, 117.7, 114.0, 43.8, 27.1, 17.7, -5.6. HRMS (ESI)  $m/z$ :  $[M + H]^+$  Calcd for  $C_{17}H_{25}N_2OSi^+$  301.1731; Found 301.1733.

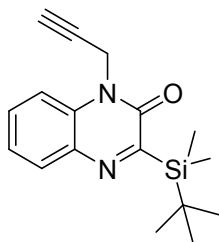

**1-(*tert*-Butyldimethylsilyl)-1-(prop-2-yn-1-yl)quinoxalin-2(1*H*)-one (3n).** The product was purified by silica gel column chromatography with petroleum ether/ethyl acetate (30:1, v/v). Yellow solid (32.8 mg, 55% yield). mp 42–43 °C. <sup>1</sup>H NMR (400 MHz, CDCl<sub>3</sub>) δ (ppm) 7.96 (dd, *J* = 8.0, 1.5 Hz, 1H), 7.61–7.56 (m, 1H), 7.45 (dd, *J* = 8.4, 1.3 Hz, 1H), 7.38–7.34 (m, 1H), 5.01 (d, *J* = 2.6 Hz, 2H), 2.30 (t, *J* = 2.5 Hz, 1H), 1.04 (s, 9H), 0.42 (s, 6H). <sup>13</sup>C NMR (100 MHz, CDCl<sub>3</sub>) δ (ppm) 172.0, 155.7, 134.5, 131.3, 131.0, 130.6, 123.5, 114.0, 77.1, 73.0, 30.8, 27.0, 17.7, -5.6. HRMS (ESI) *m/z*: [M + H]<sup>+</sup> Calcd for C<sub>17</sub>H<sub>23</sub>N<sub>2</sub>OSi<sup>+</sup> 299.1574; Found 299.1579.

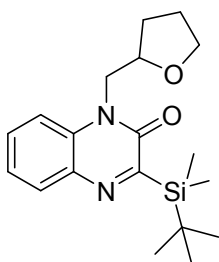

**1-(*tert*-Butyldimethylsilyl)-1-((tetrahydrofuran-2-yl)methyl)quinoxalin-2(1*H*)-one (3o).** The product was purified by silica gel column chromatography with petroleum ether/ethyl acetate (30:1, v/v). Yellow oil (46.1 mg, 67% yield). H NMR (400 MHz, CDCl<sub>3</sub>) δ (ppm) 7.92 (d, *J* = 8.4 Hz, 1H), 7.54–7.48 (m, 2H), 7.32–7.28 (m, 1H), 4.51–4.47 (m, 1H), 4.36–4.30 (m, 1H), 4.15 (dd, *J* = 13.9, 7.1 Hz, 1H), 3.92 (dd, *J* = 14.1, 7.6 Hz, 1H), 3.77–3.71 (m, 1H), 2.13–1.73 (m, 4H), 1.04 (s, 9H), 0.41 (s, 6H). <sup>13</sup>C NMR (100 MHz, CDCl<sub>3</sub>) δ (ppm) 171.6, 157.1, 134.5, 132.7, 130.8, 130.3, 123.0, 114.5, 76.9, 68.3, 45.6, 29.6, 27.1, 25.5, 17.7, -5.6. HRMS (ESI) *m/z*: [M + H]<sup>+</sup> Calcd for C<sub>19</sub>H<sub>29</sub>N<sub>2</sub>O<sub>2</sub>Si<sup>+</sup> 345.1993; Found 345.1996.

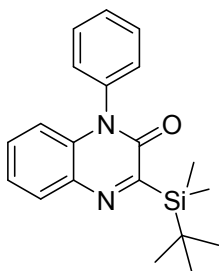

**3-(*tert*-Butyldimethylsilyl)-1-phenylquinoxalin-2(1*H*)-one (3p).** The product was purified by silica gel column chromatography with petroleum ether/ethyl acetate (30:1, v/v). Yellow solid (47.7 mg, 71% yield). mp 110–112 °C. <sup>1</sup>H NMR (400 MHz, CDCl<sub>3</sub>) δ (ppm) 8.03 (dd, *J* = 7.5, 2.1 Hz, 1H), 7.67–7.63 (m, 2H), 7.59–7.55 (m, 1H), 7.38–7.31 (m, 4H), 6.72 (dd, *J* = 7.8, 1.8 Hz, 1H), 1.12 (s, 9H), 0.48 (s, 6H). <sup>13</sup>C NMR (100 MHz, CDCl<sub>3</sub>) δ (ppm) 173.1, 156.6, 135.8, 134.1, 133.6, 130.5, 130.4, 130.2, 129.3, 128.5, 123.3, 115.4, 27.2, 17.8, -5.4. HRMS (ESI) *m/z*: [M + H]<sup>+</sup> Calcd for C<sub>20</sub>H<sub>25</sub>N<sub>2</sub>OSi<sup>+</sup> 337.1731; Found 337.1731.

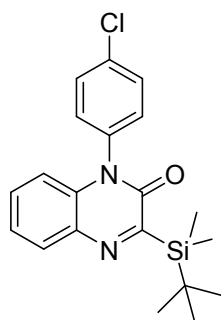

**3-(*tert*-Butyldimethylsilyl)-1-(4-chlorophenyl)quinoxalin-2(1*H*)-one (3q).** The product was purified by silica gel column chromatography with petroleum ether/ethyl acetate (30:1, v/v). Yellow oil (54.0 mg, 73% yield). <sup>1</sup>H NMR (400 MHz, CDCl<sub>3</sub>) δ (ppm) 8.01 (dd, *J* = 7.8, 1.7 Hz, 1H), 7.62–7.59 (m, 2H), 7.40–7.31 (m, 2H), 7.29–7.26 (m, 2H), 6.71 (dd, *J* = 8.1, 1.5 Hz, 1H), 1.07 (s, 9H), 0.43 (s, 6H). <sup>13</sup>C NMR (100 MHz, CDCl<sub>3</sub>) δ (ppm) 173.0, 156.4, 135.3, 134.2, 134.0, 133.2, 130.6, 130.6, 130.3, 130.0, 123.5, 115.0, 27.1, 17.7, -5.5. HRMS (ESI) *m/z*: [M + H]<sup>+</sup> Calcd for C<sub>20</sub>H<sub>24</sub>ClN<sub>2</sub>OSi<sup>+</sup> 371.1341; Found 371.1342.

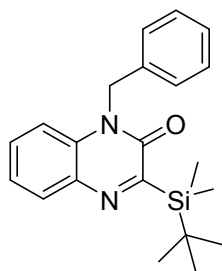

**1-Benzyl-3-(*tert*-butyldimethylsilyl)quinoxalin-2(1*H*)-one (3r).** The product was purified by silica gel column chromatography with petroleum ether/ethyl acetate (20:1, v/v). Yellow solid (53.9 mg, 77% yield). mp 72–73 °C. <sup>1</sup>H NMR (400 MHz, CDCl<sub>3</sub>) δ (ppm) 7.97 (dd, *J* = 7.9, 1.6 Hz, 1H), 7.44–7.39 (m, 1H), 7.36–7.21 (m, 7H), 5.47 (s, 2H), 1.09 (s, 9H), 0.47 (s, 6H). <sup>13</sup>C NMR (100 MHz, CDCl<sub>3</sub>) δ (ppm) 172.2, 157.0, 135.6, 134.6, 132.2, 131.0, 130.5, 128.9, 127.6, 126.8,



123.1, 114.3, 45.2, 27.1, 17.8, -5.5. HRMS (ESI)  $m/z$ :  $[M + H]^+$  Calcd for  $C_{21}H_{27}N_2OSi^+$  351.1887; Found 351.1885.

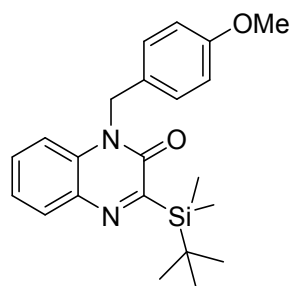

**3-(*tert*-Butyldimethylsilyl)-1-(4-methoxybenzyl)quinoxalin-2(1*H*)-one (3s).** The product was purified by silica gel column chromatography with petroleum ether/ethyl acetate (20:1, v/v). Yellow solid (54.0 mg, 71% yield). mp 60–61 °C.  $^1H$  NMR (400 MHz,  $CDCl_3$ )  $\delta$  (ppm) 7.96 (dd,  $J = 8.3, 1.5$  Hz, 1H), 7.45–7.41 (m, 1H), 7.30–7.26 (m, 2H), 7.23–7.19 (m, 2H), 6.88–6.85 (m, 2H), 5.40 (s, 2H), 3.78 (s, 3H), 1.09 (s, 9H), 0.47 (s, 6H).  $^{13}C$  NMR (100 MHz,  $CDCl_3$ )  $\delta$  (ppm) 172.2, 159.0, 157.0, 134.6, 132.2, 131.0, 130.5, 128.3, 127.7, 123.1, 114.3, 114.3, 55.3, 44.6, 27.2, 17.8, -5.5. HRMS (ESI)  $m/z$ :  $[M + H]^+$  Calcd for  $C_{22}H_{29}N_2O_2Si^+$  381.1993; Found 381.1994.

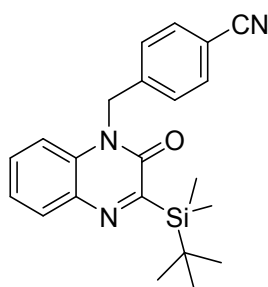

**4-((3-(*tert*-Butyldimethylsilyl)-2-oxoquinoxalin-1(2*H*)-yl)methyl)benzonitrile (3t).** The product was purified by silica gel column chromatography with petroleum ether/ethyl acetate (5:1, v/v). Yellow oil (51.0 mg, 68% yield).  $^1H$  NMR (400 MHz,  $CDCl_3$ )  $\delta$  (ppm) 7.99 (dd,  $J = 7.9, 1.6$  Hz, 1H), 7.63 (d,  $J = 8.3$  Hz, 2H), 7.46–7.41 (m, 1H), 7.34–7.30 (m, 3H), 7.08 (dd,  $J = 8.3, 1.2$  Hz, 1H), 5.50 (s, 2H), 1.06 (s, 9H), 0.44 (s, 6H).  $^{13}C$  NMR (100 MHz,  $CDCl_3$ )  $\delta$  (ppm) 172.2, 156.7, 141.0, 134.5, 132.8, 131.8, 131.3, 130.8, 127.5, 123.6, 118.5, 113.7, 111.6, 44.9, 27.1, 17.7, -5.6. HRMS (ESI)  $m/z$ :  $[M + H]^+$  Calcd for  $C_{22}H_{26}N_3OSi^+$  376.1840; Found 376.1842.

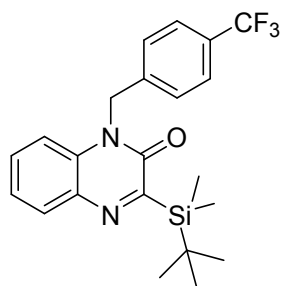

**3-(*tert*-Butyldimethylsilyl)-1-(4-(trifluoromethyl)benzyl)quinoxalin-**

**2(1H)-one (3u).** The product was purified by silica gel column chromatography with petroleum ether/ethyl acetate (20:1, v/v). Yellow solid (67.7 mg, 81% yield). mp 89–91 °C. <sup>1</sup>H NMR (400 MHz, CDCl<sub>3</sub>) δ (ppm) 8.00 (dd, *J* = 8.0, 1.5 Hz, 1H), 7.60 (d, *J* = 7.9 Hz, 2H), 7.46–7.42(m, 1H), 7.36–7.30 (m, 3H), 7.13 (dd, *J* = 8.4, 1.2 Hz, 1H), 5.52 (s, 2H), 1.08 (s, 9H), 0.46 (s, 6H). <sup>13</sup>C NMR (100 MHz, CDCl<sub>3</sub>) δ (ppm) 172.3, 156.8, 139.6, 134.5, 131.9, 131.2, 130.7, 129.9 (q, *J* = 32.5 Hz), 124.0 (q, *J* = 272.1 Hz), 127.1, 126.0 (q, *J* = 3.8 Hz), 123.4, 113.9, 44.8, 27.1, 17.7, -5.6. HRMS (ESI) *m/z*: [M + H]<sup>+</sup> Calcd for C<sub>22</sub>H<sub>26</sub>F<sub>3</sub>N<sub>2</sub>O<sup>+</sup>Si 419.1761; Found 419.1762.

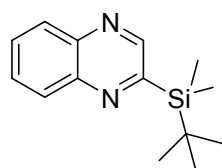

**2-(*tert*-Butyldimethylsilyl)quinoxaline (5a).** The product was purified by silica gel column chromatography with petroleum ether/ethyl acetate (50:1, v/v). Yellow oil (24.9 mg, 51% yield). <sup>1</sup>H NMR (400 MHz, CDCl<sub>3</sub>) δ (ppm) 8.93 (s, 1H), 8.21–8.17 (m, 1H), 8.11–8.07 (m, 1H), 7.78–7.73 (m, 2H), 1.00 (s, 9H), 0.47 (s, 6H). <sup>13</sup>C NMR (100 MHz, CDCl<sub>3</sub>) δ (ppm) 164.0, 148.4, 143.8, 141.5, 130.1, 129.9, 129.4, 129.4, 26.6, 17.2, -6.3. HRMS (ESI) *m/z*: [M + H]<sup>+</sup> Calcd for C<sub>14</sub>H<sub>21</sub>N<sub>2</sub>Si<sup>+</sup> 245.1469; Found 245.1469.

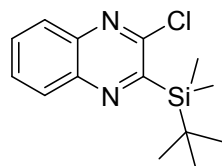

**2-(*tert*-Butyldimethylsilyl)-3-chloroquinoxaline (5b).** The product was purified by silica gel column chromatography with petroleum ether/ethyl acetate (50:1, v/v). Colorless solid (30.6 mg, 55% yield). mp 41–42 °C. <sup>1</sup>H NMR (400 MHz, CDCl<sub>3</sub>) δ (ppm) 8.18–8.14 (m, 1H), 8.00–7.96 (m, 1H), 7.80–7.73 (m, 2H), 1.05 (s, 9H), 0.54 (s, 6H). <sup>13</sup>C NMR (100 MHz, CDCl<sub>3</sub>) δ (ppm) 164.0,

152.3, 141.4, 140.6, 131.0, 129.7, 129.5, 128.2, 26.9, 18.2, -4.4. HRMS (ESI)  $m/z$ :  $[M + H]^+$   
Calcd for  $C_{14}H_{20}ClN_2Si^+$  279.1079; Found 279.1082.

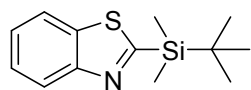

**2-(*tert*-Butyldimethylsilyl)benzo[*d*]thiazole (5c).**<sup>2</sup> The product was purified by silica gel column chromatography with petroleum ether/ethyl acetate (50:1, v/v). Colorless oil (32.4 mg, 65% yield). <sup>1</sup>H NMR (400 MHz, CDCl<sub>3</sub>)  $\delta$  (ppm) 8.24 (d,  $J$  = 8.1 Hz, 1H), 8.01–7.99 (m, 1H), 7.54–7.50 (m, 1H), 7.45–7.41 (m, 1H), 1.05 (s, 9H), 0.50 (s, 6H). <sup>13</sup>C NMR (100 MHz, CDCl<sub>3</sub>)  $\delta$  (ppm) 174.9, 156.1, 136.1, 125.7, 125.1, 123.4, 121.5, 26.4, 17.0, -5.4.

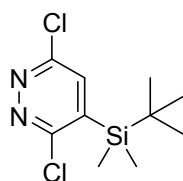

**4-(*tert*-Butyldimethylsilyl)-3,6-dichloropyridazine (5d).** The product was purified by silica gel column chromatography with petroleum ether/ethyl acetate (20:1, v/v). Colorless solid (40.3 mg, 77% yield). mp 98–99 °C. <sup>1</sup>H NMR (400 MHz, CDCl<sub>3</sub>)  $\delta$  (ppm) 7.49 (s, 1H), 0.96 (s, 9H), 0.44 (s, 6H). <sup>13</sup>C NMR (100 MHz, CDCl<sub>3</sub>)  $\delta$  (ppm) 160.8, 155.6, 143.1, 137.2, 26.8, 17.9, -4.8. HRMS (ESI)  $m/z$ :  $[M + H]^+$  Calcd for  $C_{10}H_{17}Cl_2N_2Si^+$  263.0533; Found 263.0536.

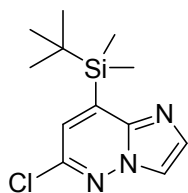

**8-(*tert*-Butyldimethylsilyl)-6-chloroimidazo[1,2-*b*]pyridazine (5ea).** The product was purified by silica gel column chromatography with petroleum ether/ethyl acetate (5:1, v/v). Colorless solid (28.8 mg, 54% yield). mp 96–98 °C. <sup>1</sup>H NMR (400 MHz, CDCl<sub>3</sub>)  $\delta$  (ppm) 7.88 (d,  $J$  = 1.2 Hz, 1H), 7.79 (d,  $J$  = 1.3 Hz, 1H), 7.03 (s, 1H), 0.97 (s, 9H), 0.49 (s, 6H). <sup>13</sup>C NMR (100 MHz, CDCl<sub>3</sub>)  $\delta$  (ppm) 146.2, 141.4, 140.8, 133.9, 124.7, 116.2, 26.9, 17.4, -5.5. HRMS (ESI)  $m/z$ :  $[M + H]^+$  Calcd for  $C_{12}H_{19}ClN_3Si^+$  268.1031; Found 268.1035.

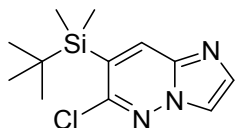

**7-(*tert*-Butyldimethylsilyl)-6-chloroimidazo[1,2-*b*]pyridazine (5eb).** The product was purified by silica gel column chromatography with petroleum ether/ethyl acetate (5:1, v/v). Yellow oil (2.7 mg, 5% yield). <sup>1</sup>H NMR (400 MHz, CDCl<sub>3</sub>) δ (ppm) 8.12 (s, 1H), 7.93 (s, 1H), 7.81 (s, 1H), 0.98 (s, 9H), 0.46 (s, 6H). <sup>13</sup>C NMR (100 MHz, CDCl<sub>3</sub>) δ (ppm) 151.6, 141.4, 135.0, 134.4, 128.7, 116.8, 27.0, 17.9, -4.0. HRMS (ESI) m/z: [M + H]<sup>+</sup> Calcd for C<sub>12</sub>H<sub>19</sub>ClN<sub>3</sub>Si<sup>+</sup> 268.1031; Found 268.1036.

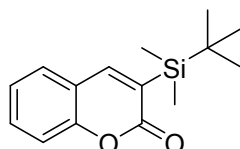

**3-(*tert*-Butyldimethylsilyl)-2*H*-chromen-2-one (5f).** The product was purified by silica gel column chromatography with petroleum ether/ethyl acetate (20:1, v/v). White solid (22.9 mg, 44% yield). mp 98–100 °C. <sup>1</sup>H NMR (400 MHz, CDCl<sub>3</sub>) δ (ppm) 7.82 (s, 1H), 7.54–7.48 (m, 2H), 7.32–7.24 (m, 2H), 0.98 (s, 9H), 0.34 (s, 6H). <sup>13</sup>C NMR (100 MHz, CDCl<sub>3</sub>) δ (ppm) 162.8, 154.8, 151.6, 131.8, 128.0, 127.7, 124.0, 119.2, 116.6, 27.0, 17.3, -5.7. HRMS (ESI) m/z: [M + H]<sup>+</sup> Calcd for C<sub>15</sub>H<sub>21</sub>O<sub>2</sub>Si<sup>+</sup> 261.1305; Found 261.1307.

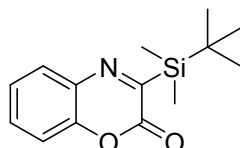

**3-(*tert*-Butyldimethylsilyl)-2*H*-benzo[*b*][1,4]oxazin-2-one (5g).** The product was purified by silica gel column chromatography with petroleum ether/ethyl acetate (20:1, v/v). Yellow solid (11.0 mg, 21% yield). mp 44–45 °C. <sup>1</sup>H NMR (400 MHz, CDCl<sub>3</sub>) δ (ppm) 7.86 (dd, *J* = 7.9, 1.7 Hz, 1H), 7.52–7.48 (m, 1H), 7.39–7.34 (m, 1H), 7.27 (dd, *J* = 8.2, 1.4 Hz, 1H), 1.04 (s, 9H), 0.41 (s, 6H). <sup>13</sup>C NMR (100 MHz, CDCl<sub>3</sub>) δ (ppm) 169.7, 153.6, 146.0, 132.3, 131.4, 129.8, 125.0, 116.5, 26.8, 17.6, -6.0. HRMS (ESI) m/z: [M + H]<sup>+</sup> Calcd for C<sub>14</sub>H<sub>20</sub>NO<sub>2</sub>Si<sup>+</sup> 262.1258; Found 262.1259.

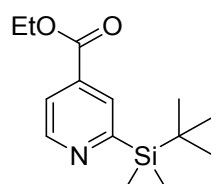

**Ethyl 2-(*tert*-butyldimethylsilyl)isonicotinate (5h).** The product was purified by silica gel column chromatography with petroleum ether/ethyl acetate (3:1, v/v). Light yellow oil (17.5 mg, 33% yield). <sup>1</sup>H NMR (400 MHz, CDCl<sub>3</sub>) δ (ppm) 8.84 (s, 1H), 8.67 (d, *J* = 5.1 Hz, 1H), 7.52 (d, *J* = 5.1 Hz, 1H), 4.37 (q, *J* = 7.1 Hz, 2H), 1.40 (t, *J* = 7.2 Hz, 3H), 0.96 (s, 9H), 0.33 (s, 6H). <sup>13</sup>C NMR (101 MHz, CDCl<sub>3</sub>) δ (ppm) 168.0, 156.8, 149.9, 145.9, 131.1, 122.3, 61.8, 27.3, 17.9, 14.2, -3.8. HRMS (ESI) *m/z*: [M + H]<sup>+</sup> Calcd for C<sub>14</sub>H<sub>24</sub>NO<sub>2</sub>Si<sup>+</sup> 266.1571; Found 266.1572.

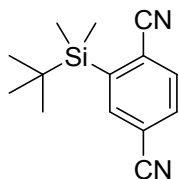

**2-(*tert*-Butyldimethylsilyl)terephthalonitrile (5i).**<sup>2</sup> The product was purified by silica gel column chromatography with petroleum ether/ethyl acetate (10:1, v/v). Colorless solid (31.5 mg, 65% yield). mp 93–95 °C. <sup>1</sup>H NMR (400 MHz, CDCl<sub>3</sub>) δ (ppm) 7.87 (d, *J* = 1.7 Hz, 1H), 7.82 (d, *J* = 8.0 Hz, 1H), 7.75 (dd, *J* = 8.0, 1.7 Hz, 1H), 0.95 (s, 9H), 0.51 (s, 6H). <sup>13</sup>C NMR (100 MHz, CDCl<sub>3</sub>) δ (ppm) 144.6, 139.4, 134.2, 132.3, 122.0, 119.1, 117.7, 115.4, 26.5, 18.0, -5.1.

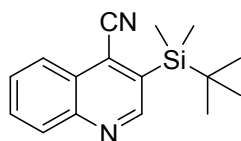

**3-(*tert*-Butyldimethylsilyl)quinoline-4-carbonitrile (5j).** The product was purified by silica gel column chromatography with petroleum ether/ethyl acetate (20:1, v/v). White solid (36.5 mg, 68% yield). mp 55–57 °C. <sup>1</sup>H NMR (400 MHz, CDCl<sub>3</sub>) δ (ppm) 9.08 (s, 1H), 8.27–8.25 (m, 1H), 8.17 (d, *J* = 8.4 Hz, 1H), 7.86–7.82 (m, 1H), 7.76–7.72 (m, 1H), 0.98 (s, 9H), 0.59 (s, 6H). <sup>13</sup>C NMR (100 MHz, CDCl<sub>3</sub>) δ (ppm) 154.4, 147.6, 135.6, 131.3, 130.0, 129.0, 126.5, 125.1, 125.1, 117.0, 26.5, 18.4, -5.0. HRMS (ESI) *m/z*: [M + H]<sup>+</sup> Calcd for C<sub>16</sub>H<sub>21</sub>N<sub>2</sub>Si<sup>+</sup> 269.1469; Found 269.1465.

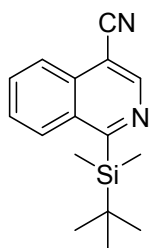

**1-(*tert*-Butyldimethylsilyl)isoquinoline-4-carbonitrile (5ka).** The product was purified by silica gel column chromatography with petroleum ether/ethyl acetate (100:1, v/v). White solid (30.0 mg,

56% yield). mp 35–36 °C.  $^1\text{H}$  NMR (400 MHz,  $\text{CDCl}_3$ )  $\delta$  (ppm) 9.03 (s, 1H), 8.37 (d,  $J = 8.5$  Hz, 1H), 8.21 (d,  $J = 8.3$  Hz, 1H), 7.90–7.86 (m, 1H), 7.77–7.72 (m, 1H), 0.97 (s, 9H), 0.58 (s, 6H).  $^{13}\text{C}$  NMR (100 MHz,  $\text{CDCl}_3$ )  $\delta$  (ppm) 177.4, 146.7, 132.8, 132.7, 131.8, 129.4, 128.3, 124.9, 116.7, 104.7, 27.0, 18.0, -3.1. HRMS (ESI)  $m/z$ :  $[\text{M} + \text{H}]^+$  Calcd for  $\text{C}_{16}\text{H}_{21}\text{N}_2\text{Si}^+$  269.1469; Found 269.1466.

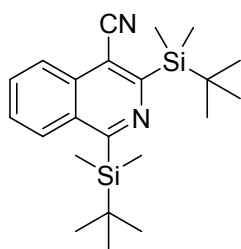

**1,3-Bis(*tert*-butyldimethylsilyl)isoquinoline-4-carbonitrile (5kb).** The product was purified by silica gel column chromatography with petroleum ether/ethyl acetate (100:1, v/v). White solid (14.5 mg, 19% yield). mp 78–80 °C.  $^1\text{H}$  NMR (400 MHz,  $\text{CDCl}_3$ )  $\delta$  (ppm) 8.31 (d,  $J = 8.4$  Hz, 1H), 8.26 (d,  $J = 8.3$  Hz, 1H), 7.87–7.82 (m, 1H), 7.74–7.70 (m, 1H), 1.01 (s, 9H), 0.96 (s, 9H), 0.58 (s, 1H), 0.57 (s, 1H).  $^{13}\text{C}$  NMR (100 MHz,  $\text{CDCl}_3$ )  $\delta$  (ppm) 173.8, 163.1, 132.4, 131.3, 131.1, 129.1, 128.2, 124.9, 118.2, 111.4, 27.1, 26.8, 18.2, 17.9, -3.0, -4.7. HRMS (ESI)  $m/z$ :  $[\text{M} + \text{H}]^+$  Calcd for  $\text{C}_{22}\text{H}_{35}\text{N}_2\text{Si}_2^+$  383.2333; Found 383.2332.

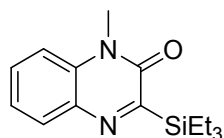

**1-Methyl-3-(triethylsilyl)quinoxalin-2(1H)-one (6a).** The product was purified by silica gel column chromatography with petroleum ether/ethyl acetate (30:1, v/v). Orange oil (28.0 mg, 51% yield).  $^1\text{H}$  NMR (400 MHz,  $\text{CDCl}_3$ )  $\delta$  (ppm) 7.96 (dd,  $J = 7.9, 1.5$  Hz, 1H), 7.57–7.53 (m, 1H), 7.36–7.28 (m, 2H), 3.66 (s, 3H), 1.07–0.97 (m, 15H).  $^{13}\text{C}$  NMR (100 MHz,  $\text{CDCl}_3$ )  $\delta$  (ppm) 172.2, 157.0, 134.5, 132.8, 130.8, 130.5, 123.1, 113.5, 28.3, 7.6, 3.0. HRMS (ESI)  $m/z$ :  $[\text{M} + \text{H}]^+$  Calcd for  $\text{C}_{15}\text{H}_{23}\text{N}_2\text{OSi}^+$  275.1574; Found 275.1575.

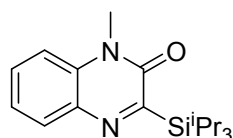

**1-Methyl-3-(triisopropylsilyl)quinoxalin-2(1H)-one (6b).** The product was purified by silica gel column chromatography with petroleum ether/ethyl acetate (30:1, v/v). Yellow solid (41.7 mg, 66%

yield). mp 67–69 °C. <sup>1</sup>H NMR (400 MHz, CDCl<sub>3</sub>) δ (ppm) 7.96 (d, *J* = 7.9 Hz, 1H), 7.56 (t, *J* = 7.8 Hz, 1H), 7.36–7.30 (m, 2H), 3.67 (s, 3H), 1.70–1.62 (m, 3H), 1.17 (d, *J* = 7.5 Hz, 18H). <sup>13</sup>C NMR (100 MHz, CDCl<sub>3</sub>) δ (ppm) 171.7, 157.0, 134.4, 132.8, 130.8, 130.4, 123.0, 113.5, 28.5, 19.0, 11.8. HRMS (ESI) *m/z*: [M + H]<sup>+</sup> Calcd for C<sub>18</sub>H<sub>29</sub>N<sub>2</sub>O<sub>2</sub>Si<sup>+</sup> 317.2044; Found 317.2043.

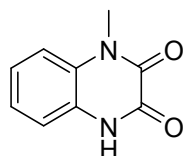

**1-Methyl-1,4-dihydroquinoxaline-2,3-dione (7).**<sup>3</sup> Yellow solid (37.3 mg, 53% yield). mp 285–286 °C. <sup>1</sup>H NMR (400 MHz, DMSO-*d*<sub>6</sub>) δ (ppm) 12.02 (s, 1H), 7.35 (s, 1H), 7.18 (s, 3H), 3.51 (s, 3H). <sup>13</sup>C NMR (100 MHz, DMSO) δ (ppm) 155.7, 154.1, 127.7, 126.0, 124.0, 123.7, 115.8, 115.5, 30.1.

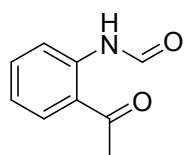

**N-(2-acetylphenyl)formamide (9).**<sup>4</sup> White solid (28.2 mg, 64% yield). mp 70–71 °C. <sup>1</sup>H NMR (400 MHz, CDCl<sub>3</sub>) δ (ppm) 11.64 (brs, 1H), 8.84–8.64 (m, 1H), 8.50 (brs, 1H), 7.93 (dd, *J* = 8.0, 1.6 Hz, 1H), 7.59–7.55 (m, 1H), 7.22–7.14 (m, 1H), 2.68 (s, 3H). <sup>13</sup>C NMR (100 MHz, CDCl<sub>3</sub>) δ (ppm) 202.9, 160.0, 139.9, 135.2, 131.7, 123.1, 121.9, 121.6, 28.7.

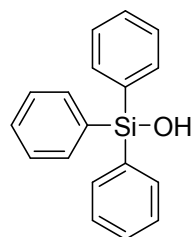

**Triphenylsilanol (10).**<sup>5</sup> White solid (196.0 mg, 71% yield). mp 52–53 °C. <sup>1</sup>H NMR (400 MHz, CDCl<sub>3</sub>) δ (ppm) 7.75–7.71 (m, 6H), 7.45–7.40 (m, 8H), 7.37–7.35 (m, 1H). <sup>13</sup>C NMR (100 MHz, CDCl<sub>3</sub>) δ (ppm) 135.6, 135.1, 130.0, 127.9.

## 7 References

- (1) R. Zhou, J. Li, H. W. Cheo, R. Chua, G. Zhan, Z. Hou and J. Wu, *Chem. Sci.*, 2019, **10**, 7340–7344.
- (2) S. Liu, P. Pan, H. Fan, H. Li, W. Wang and Y. Zhang, *Chem. Sci.*, 2019, **10**, 3817–3825.

- (3) S. Peng, D. Hu, J.-L. Hu, Y.-W. Lin, S.-S. Tang, H.-S. Tang, J.-Y. He, Z. Cao and W.-M. He, *Adv. Synth. Catal.*, 2019, **361**, 5721–5726.
- (4) W. Schilling, Y. Zhang, R. Daniel and S. Das, *Chem. Eur. J.*, 2020, **26**, 390–395.
- (5) K. Wang, J. Zhou, Y. Jiang, M. Zhang, C. Wang, D. Xue, W. Tang, H. Sun, J. Xiao and C. Li, *Angew. Chem., Int. Ed.*, 2019, **58**, 6380–6384.



## 8 <sup>1</sup>H and <sup>13</sup>C NMR spectra of the products

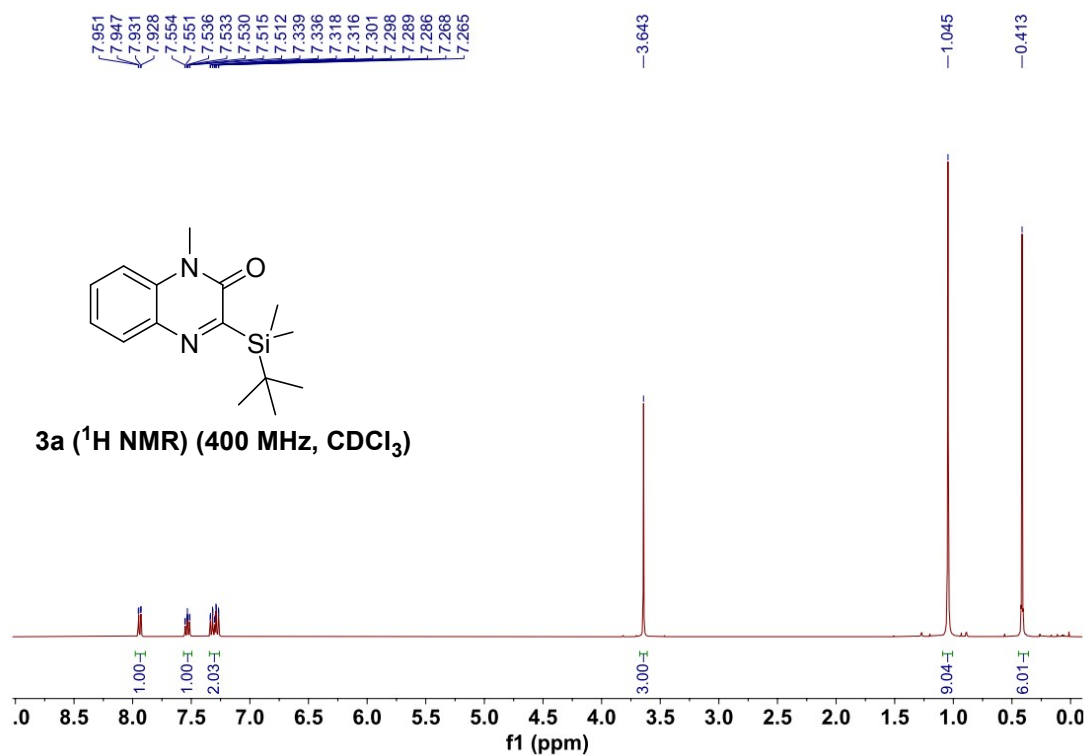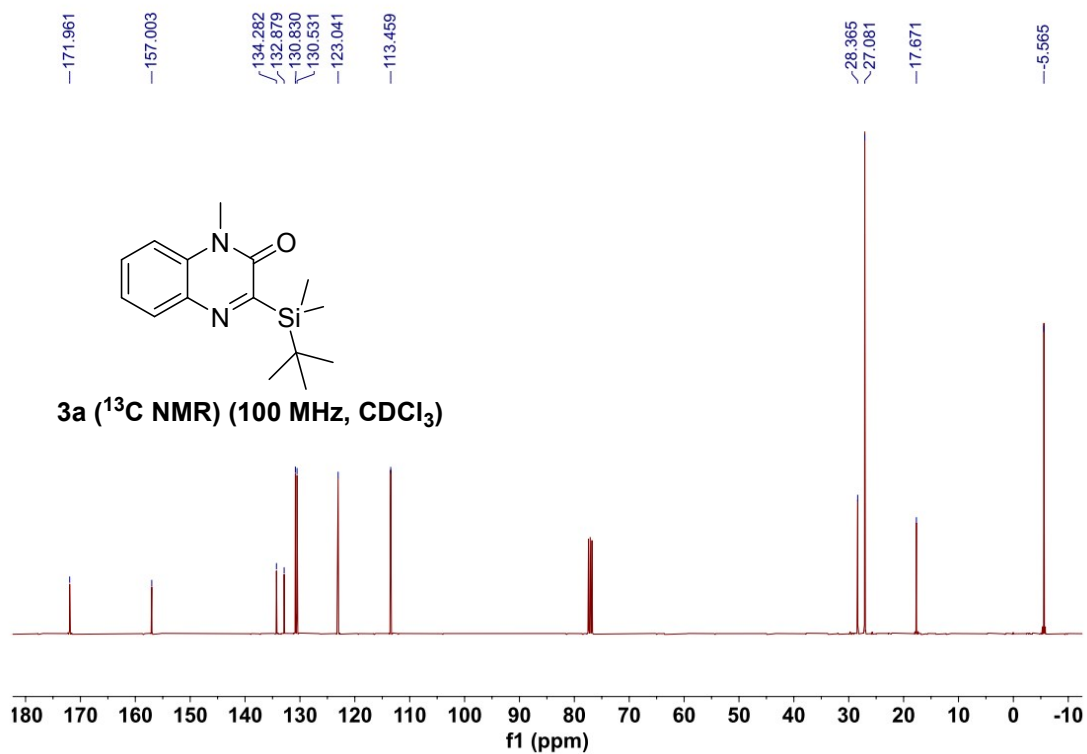

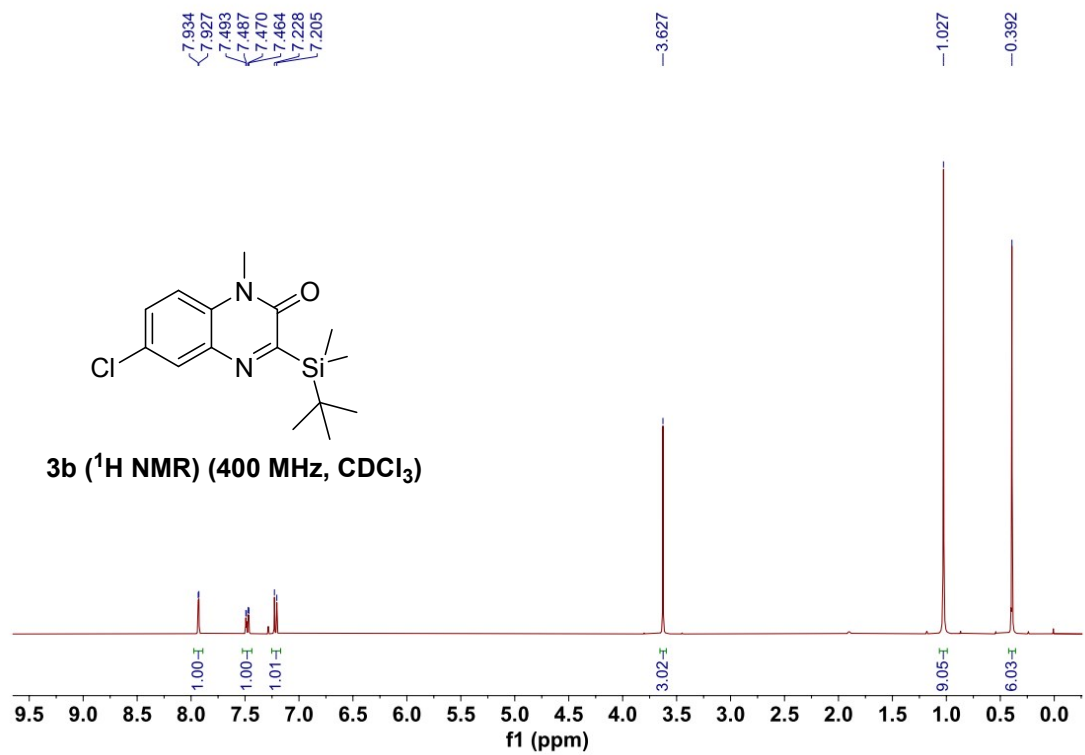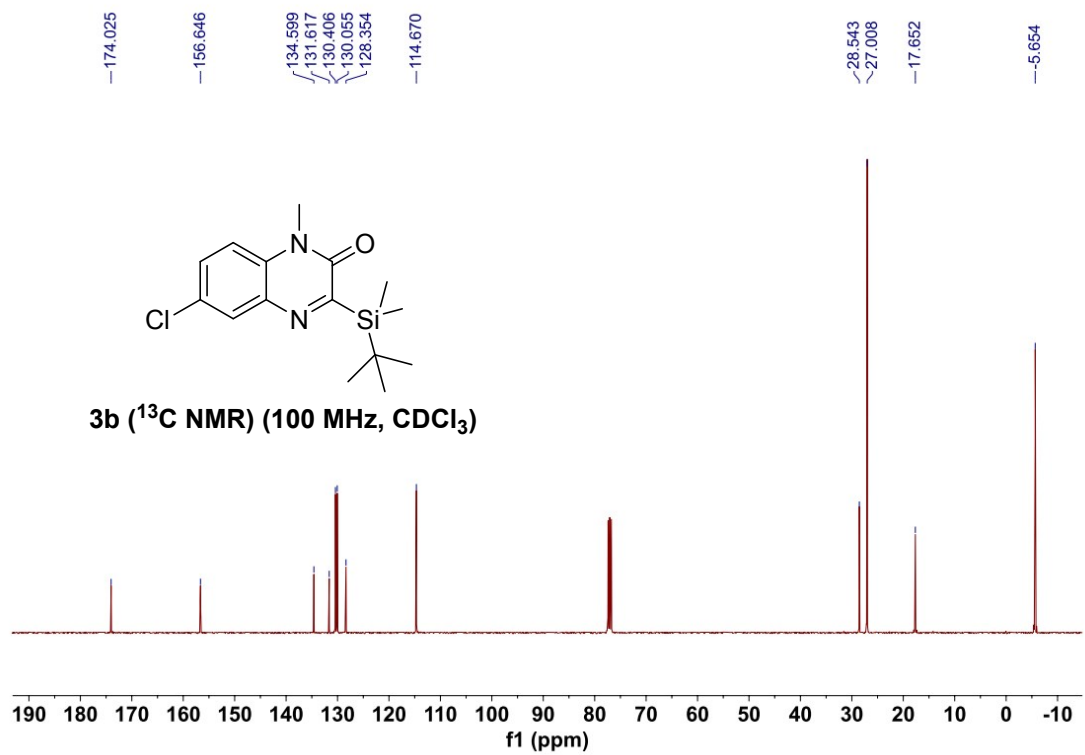

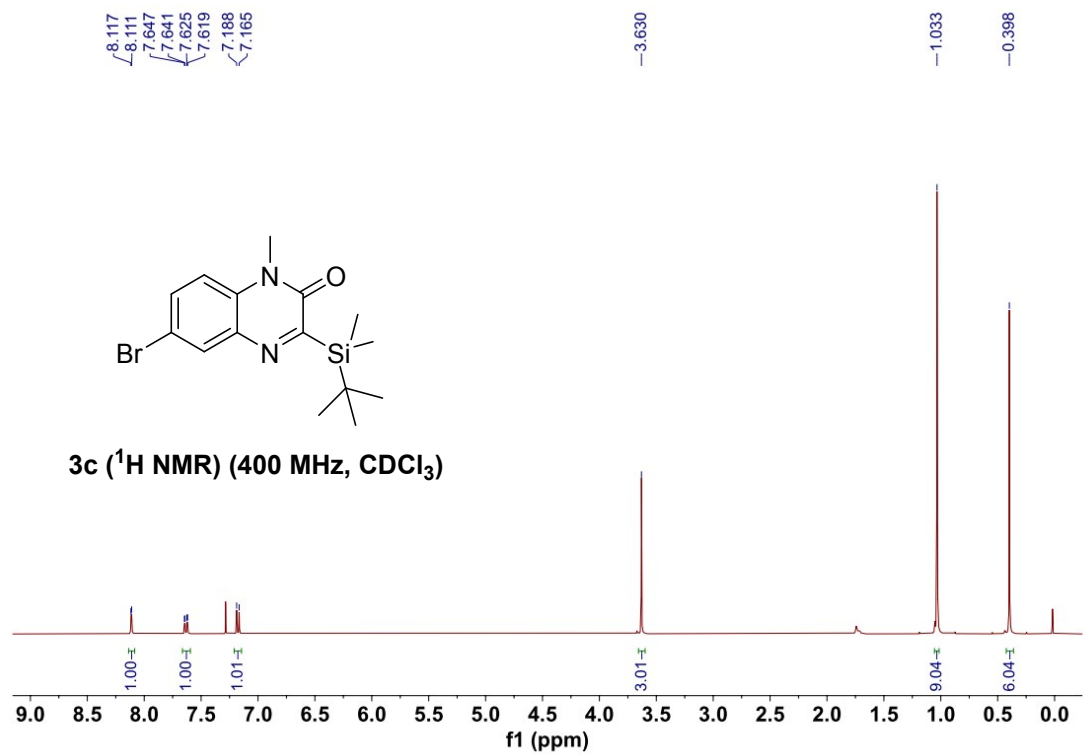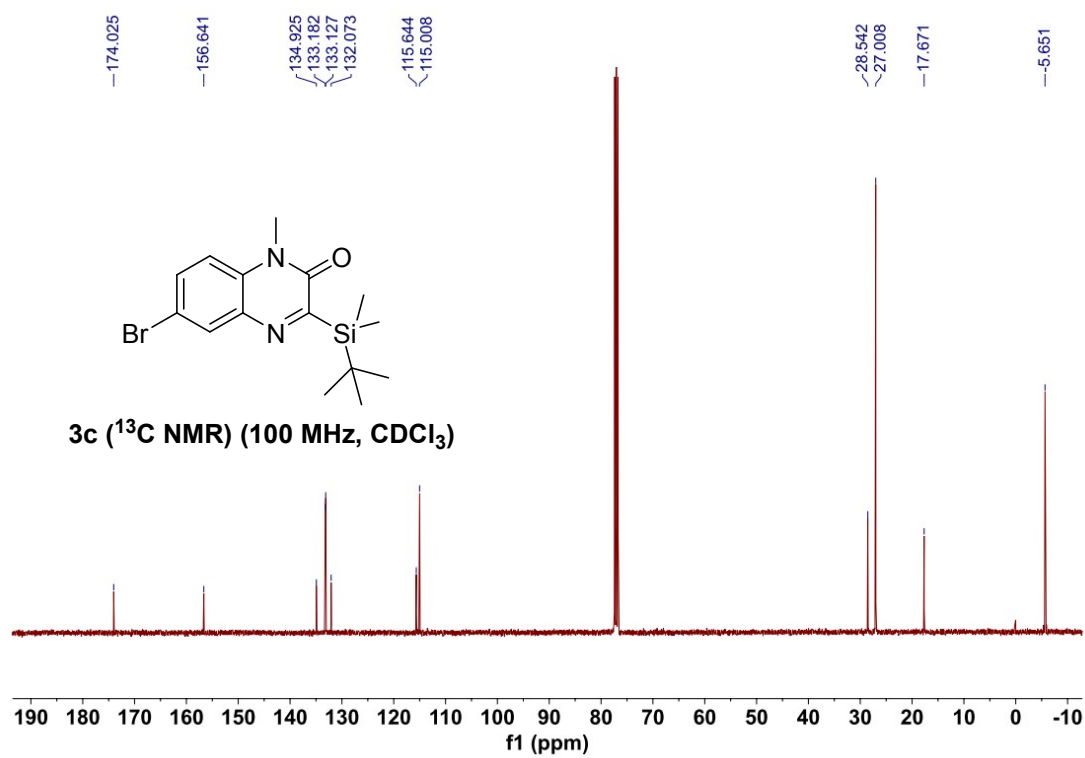

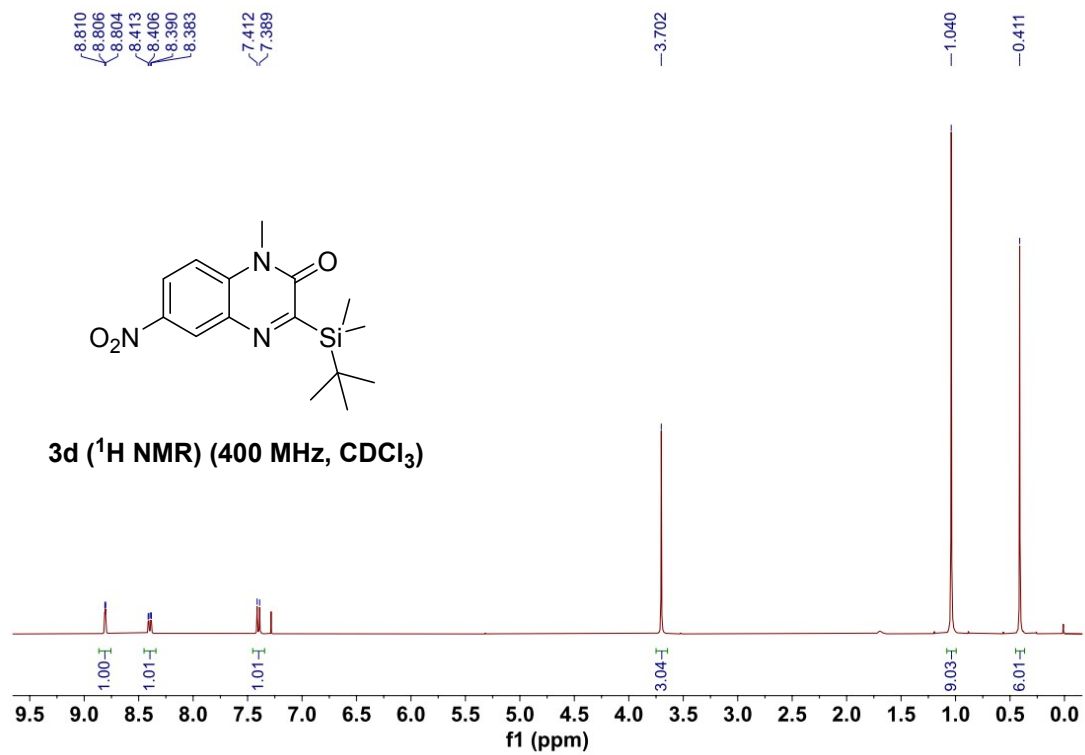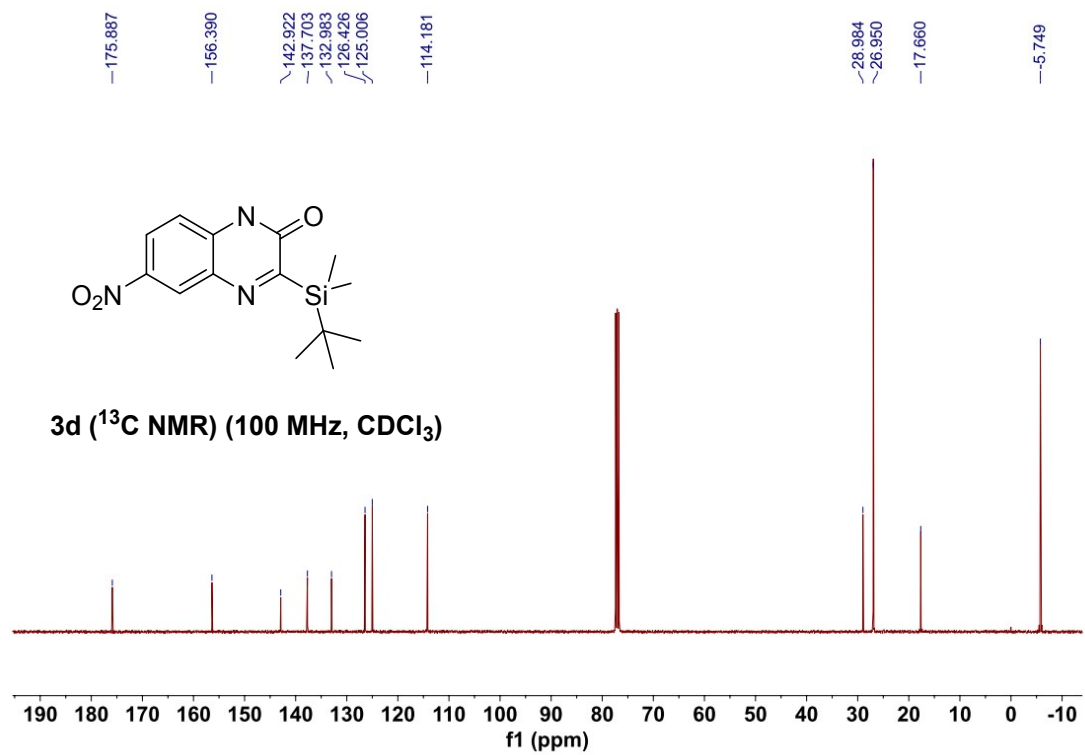

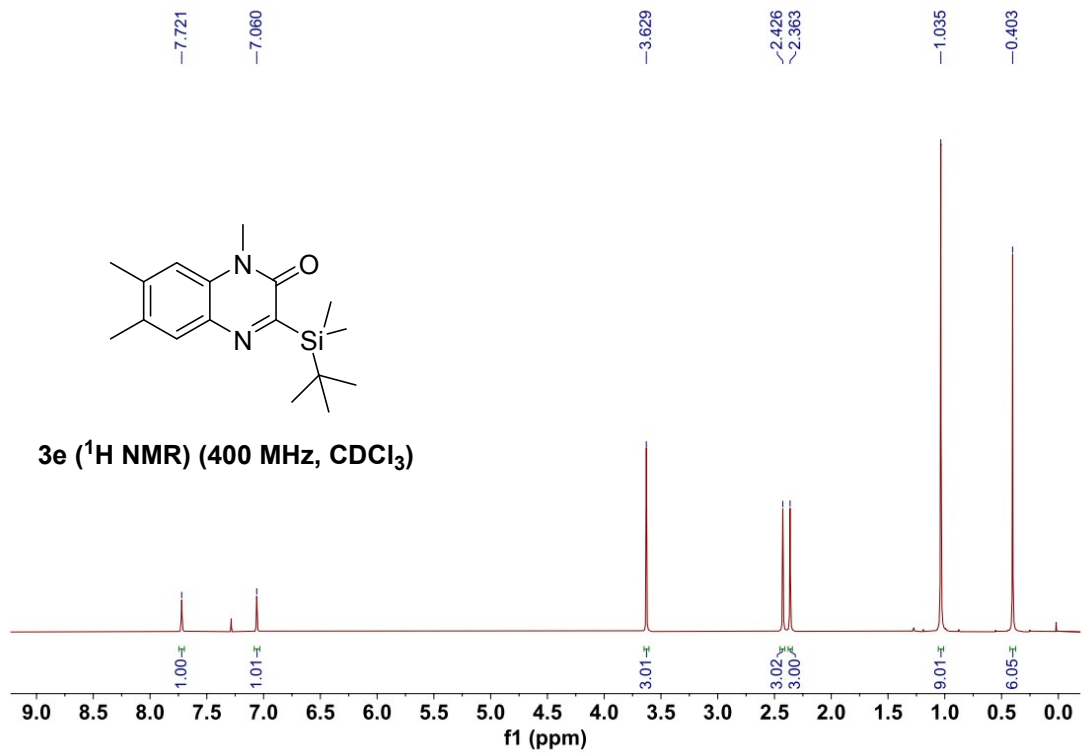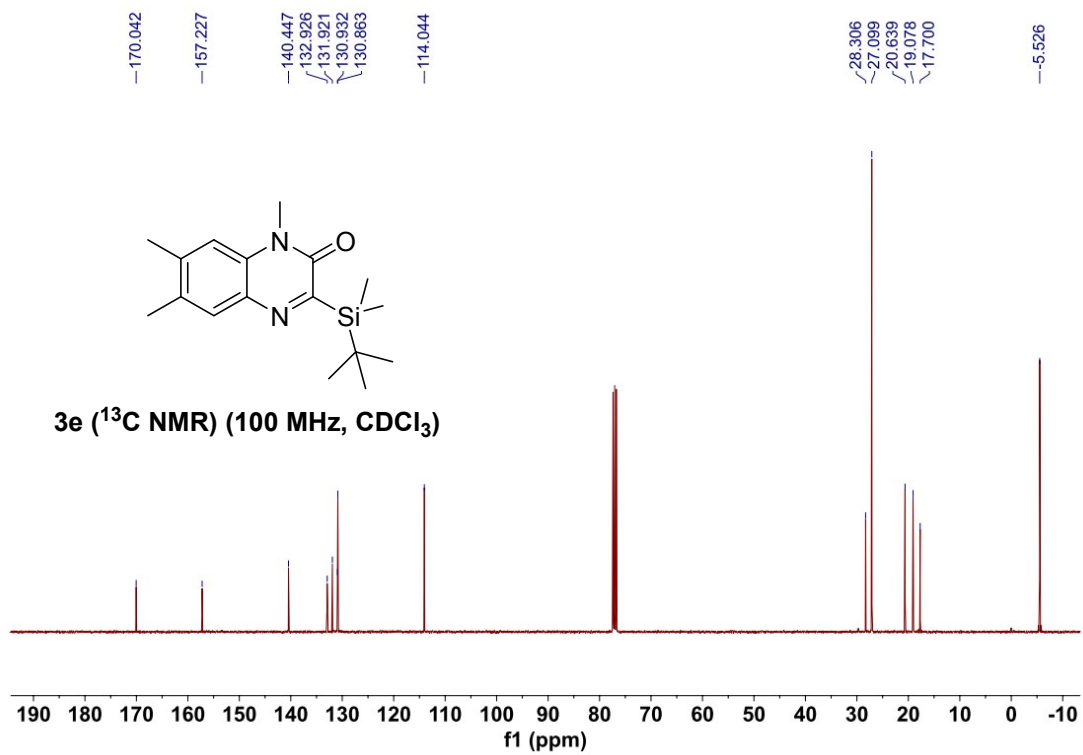

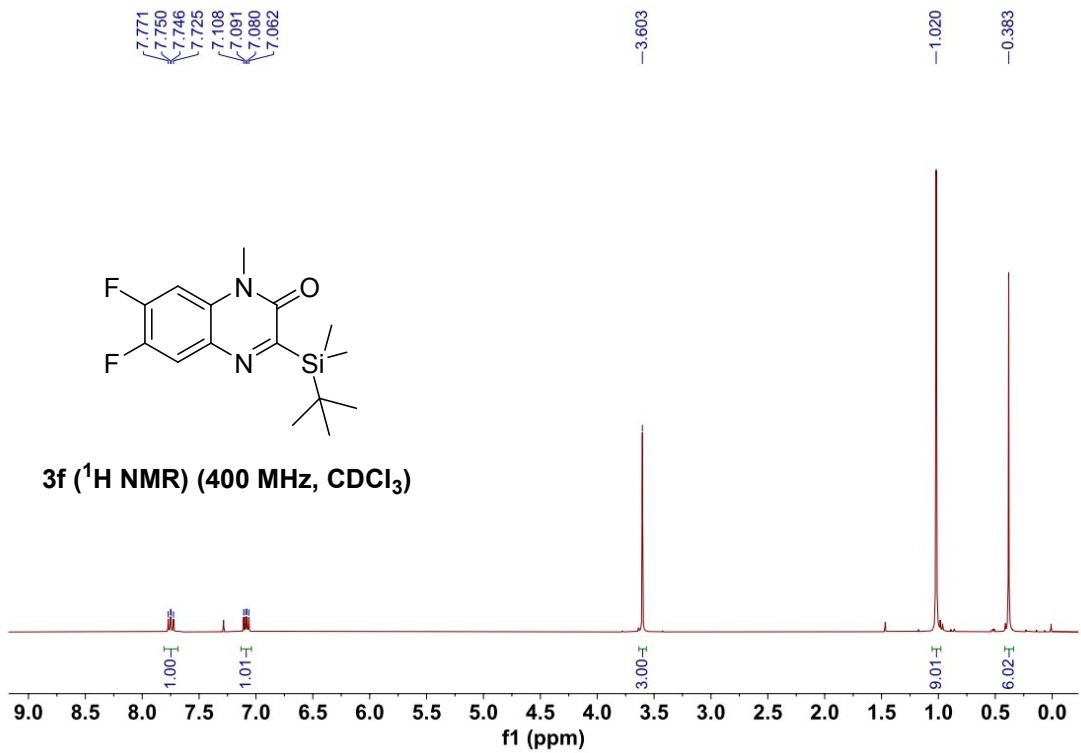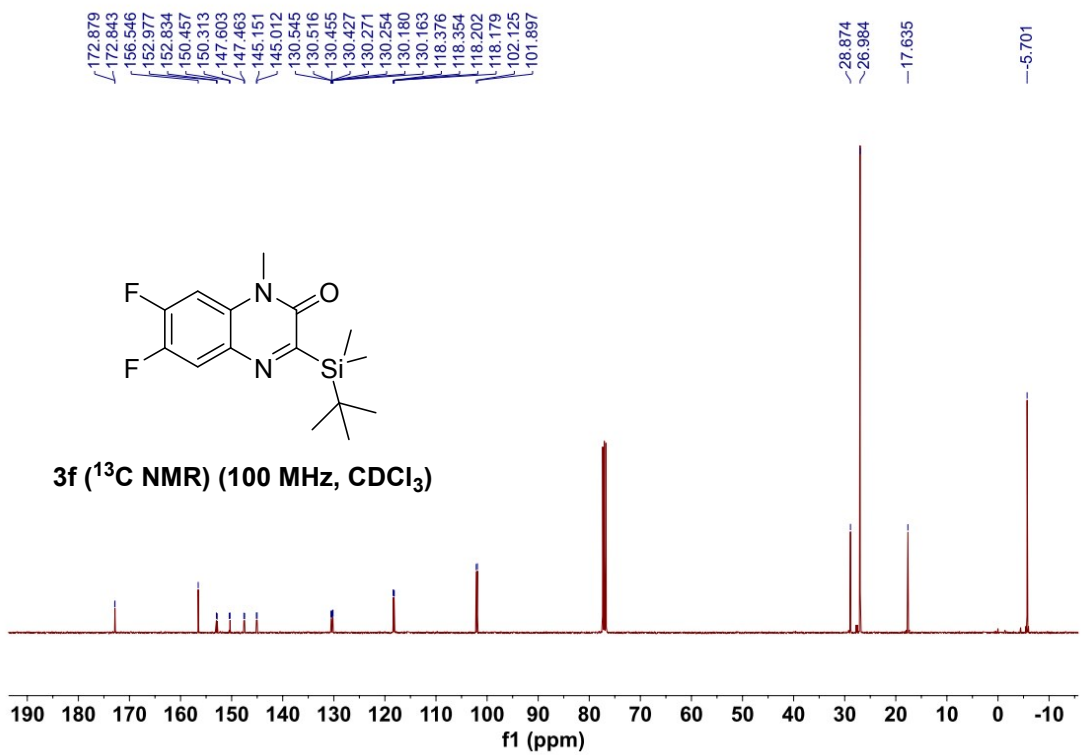

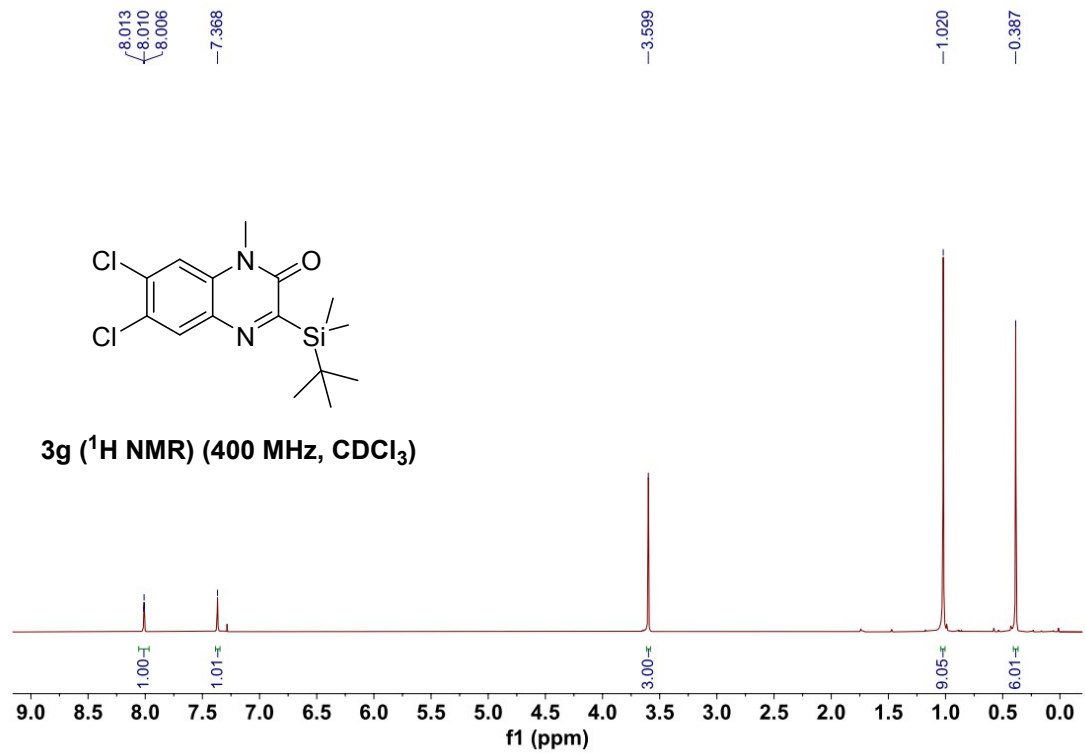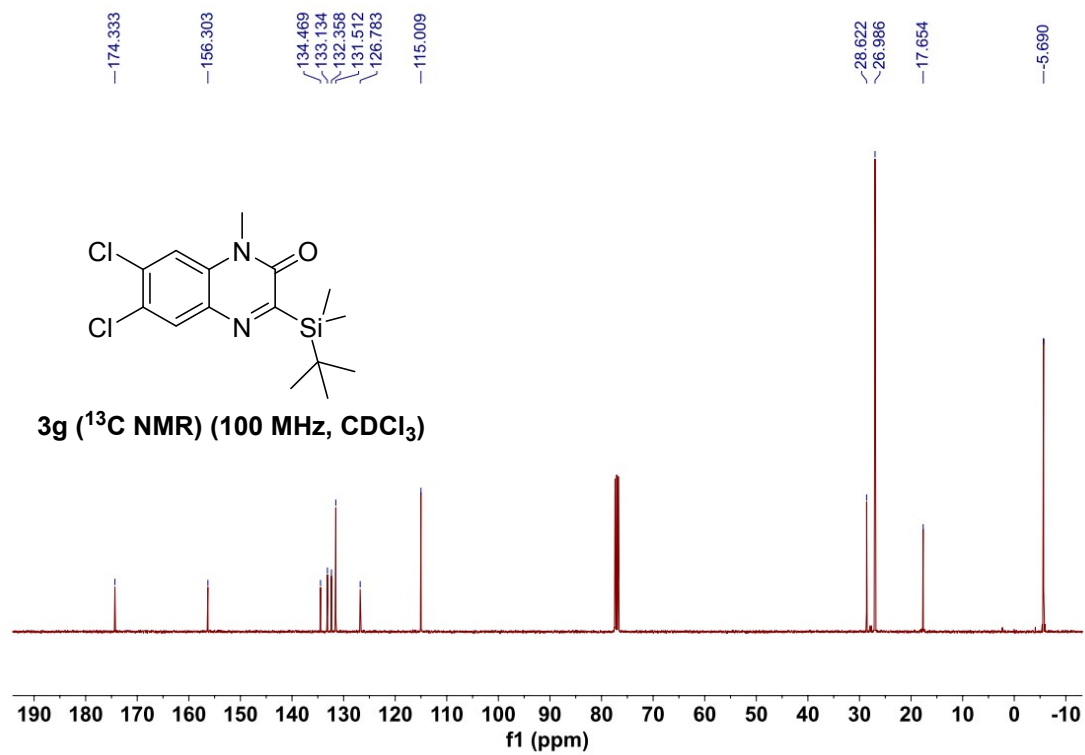

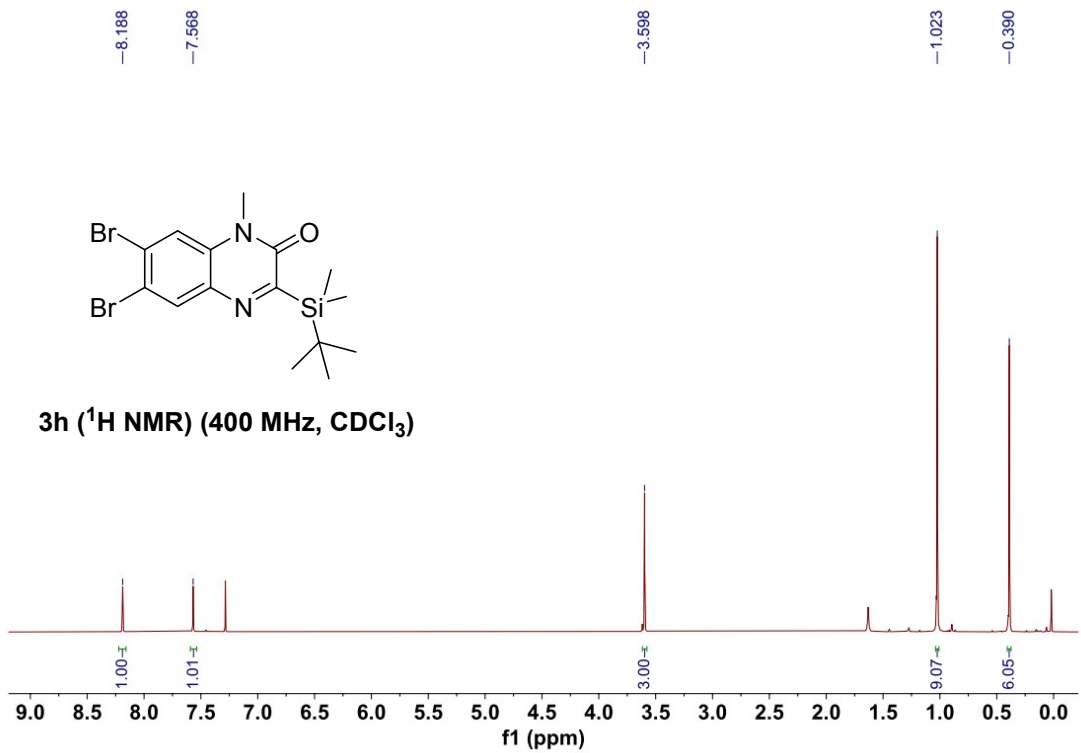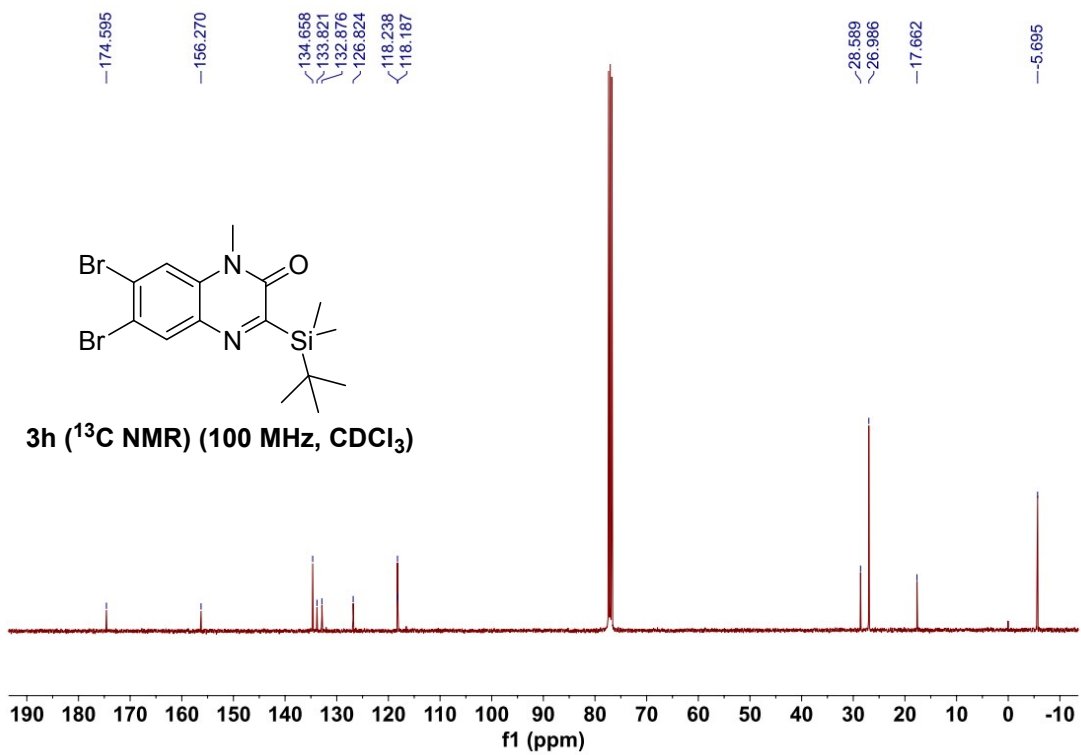



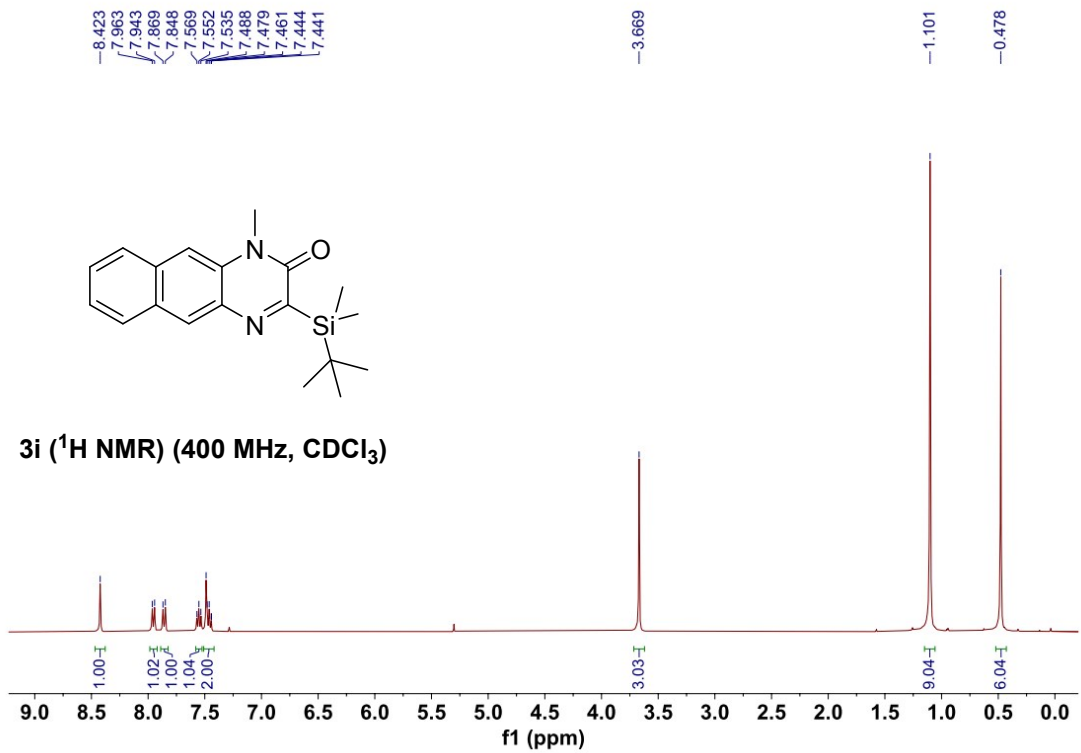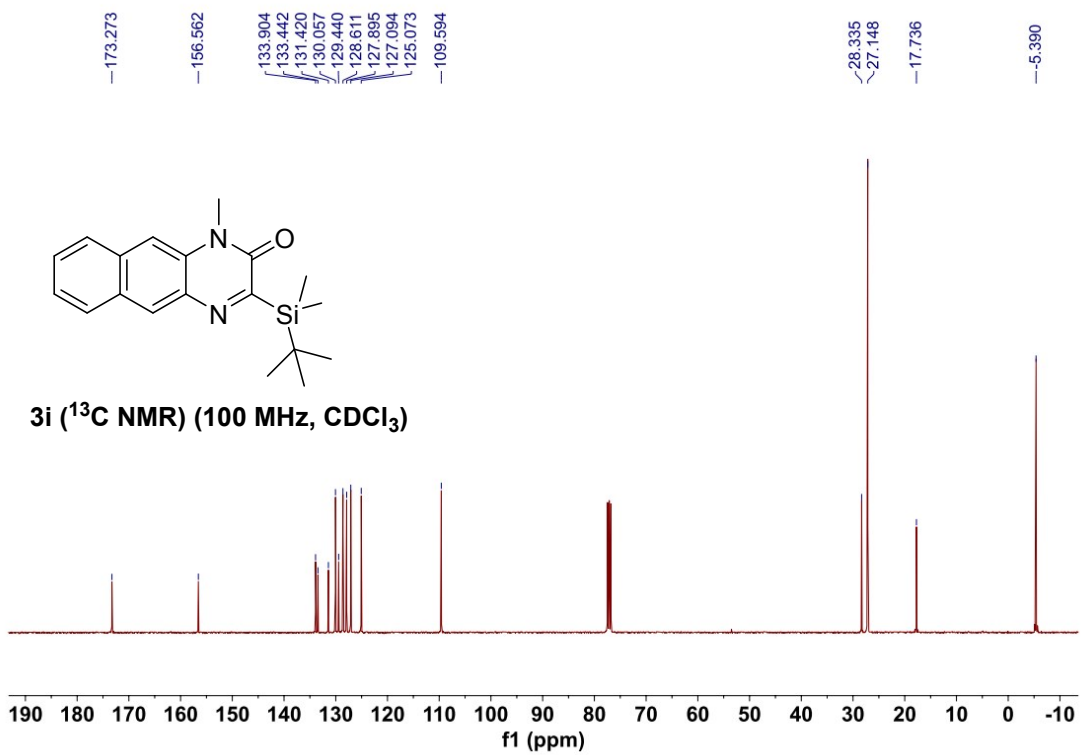

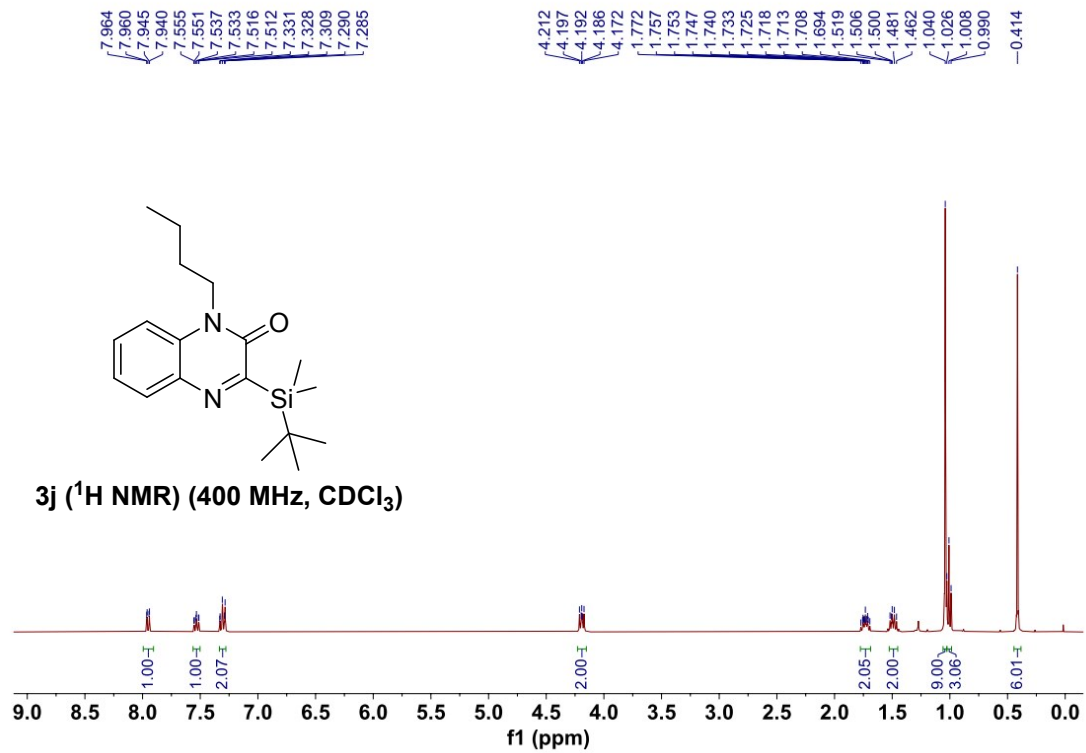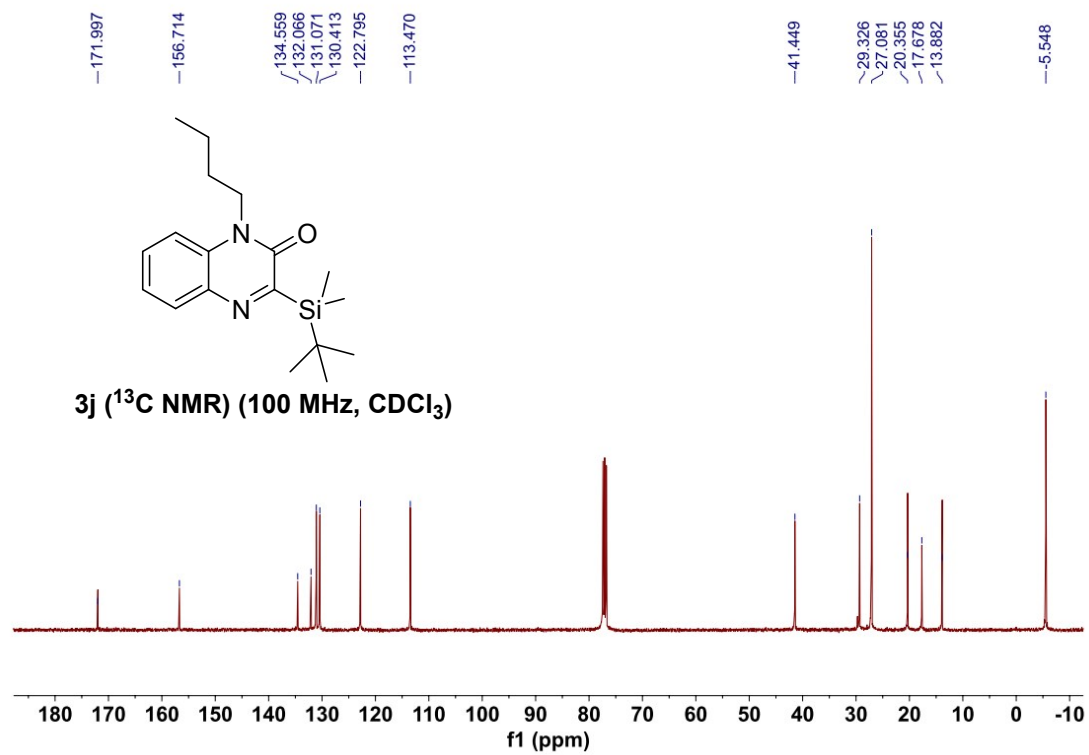

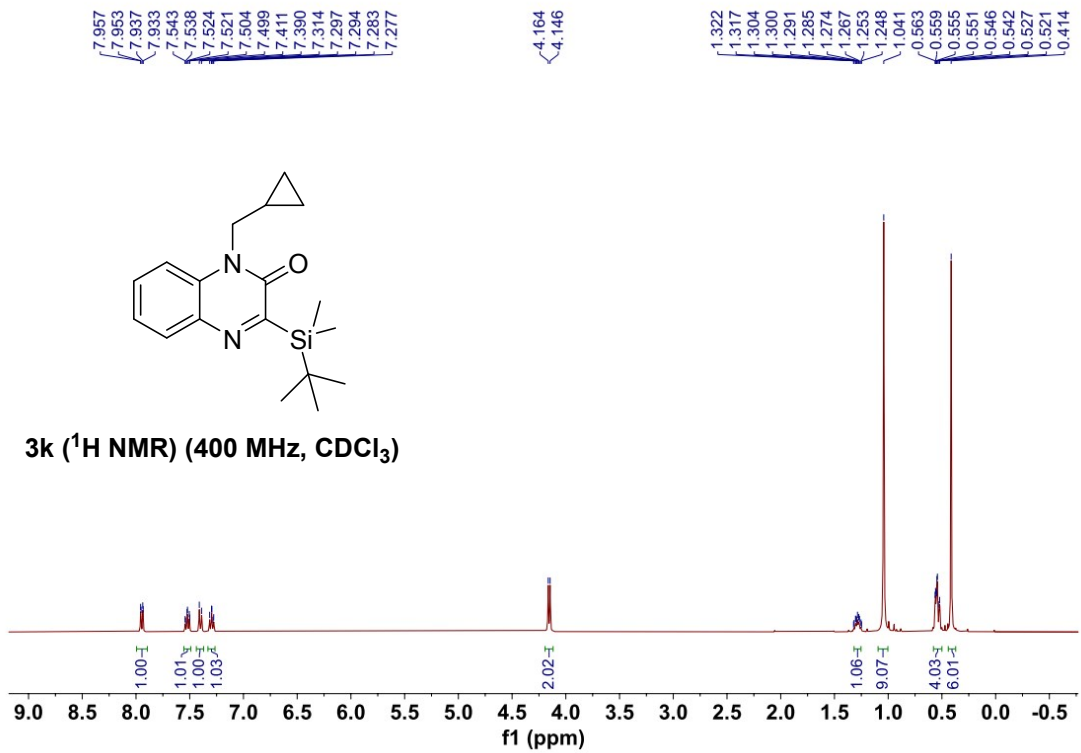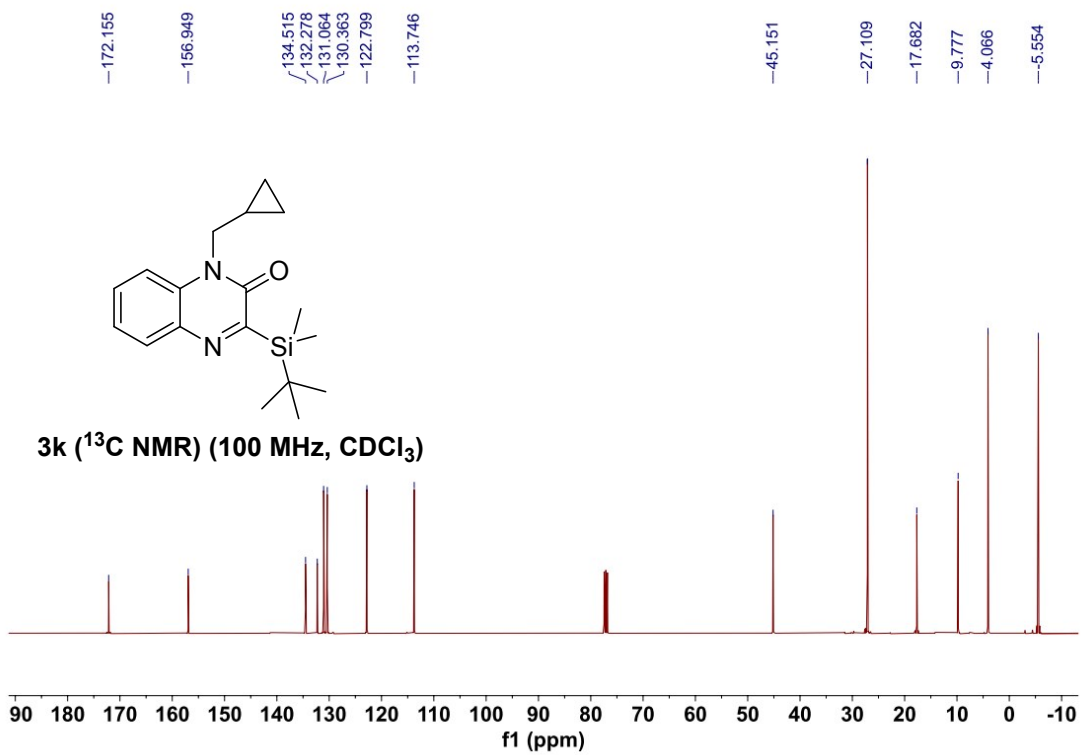

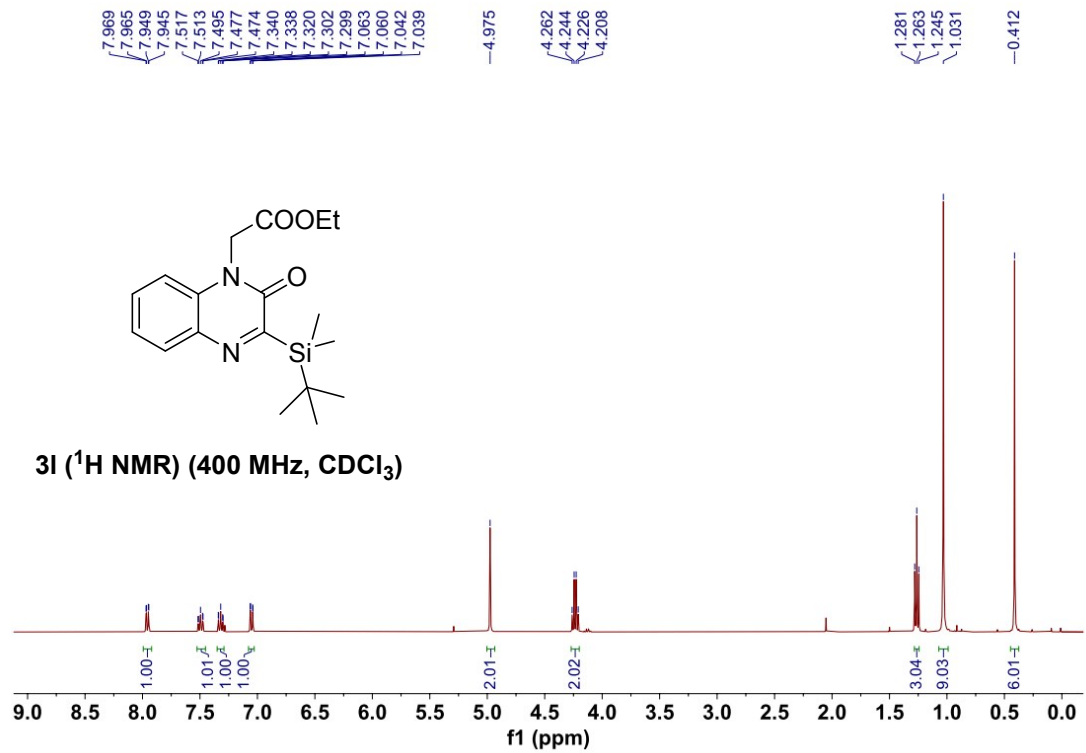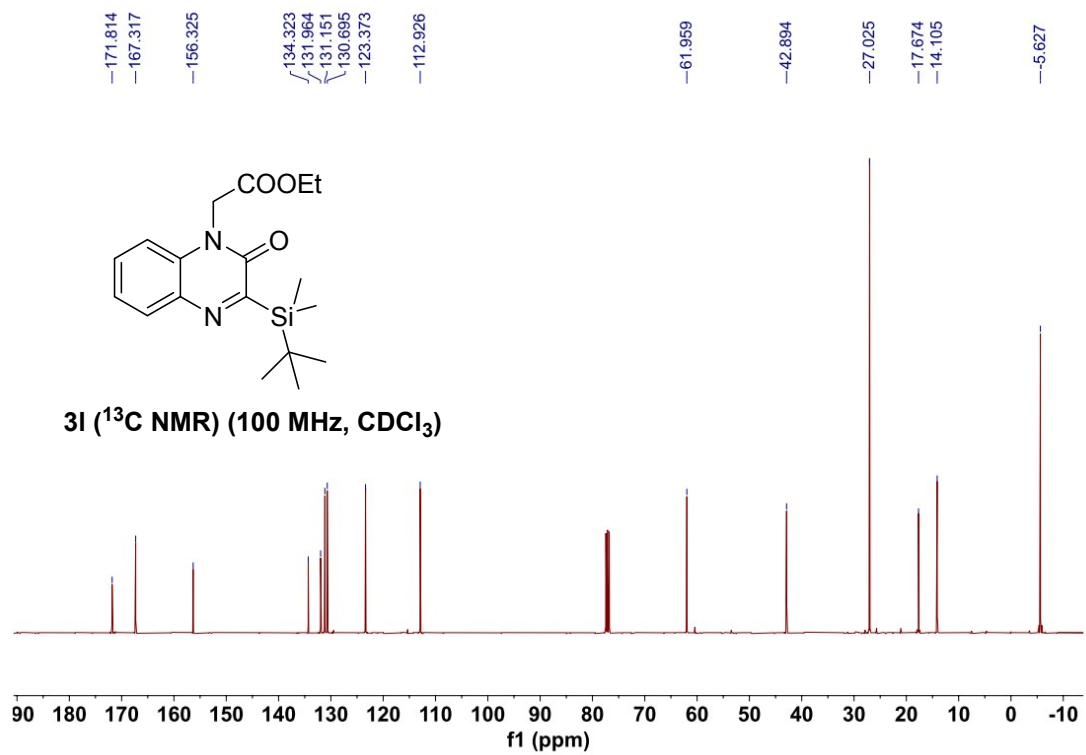

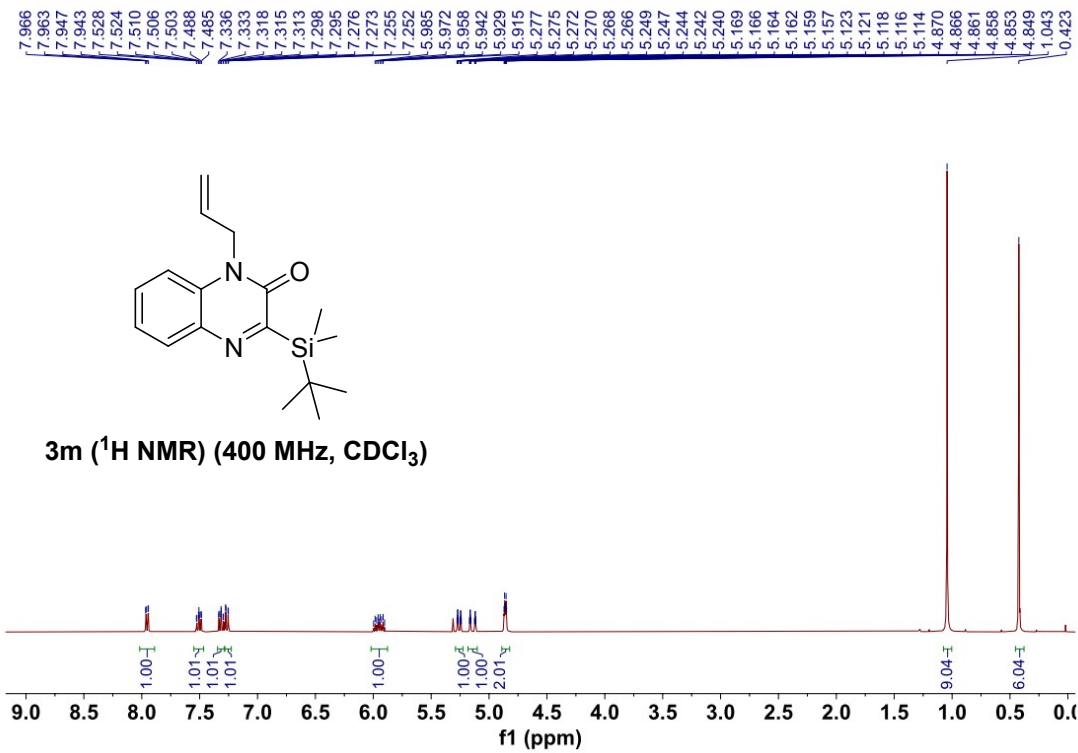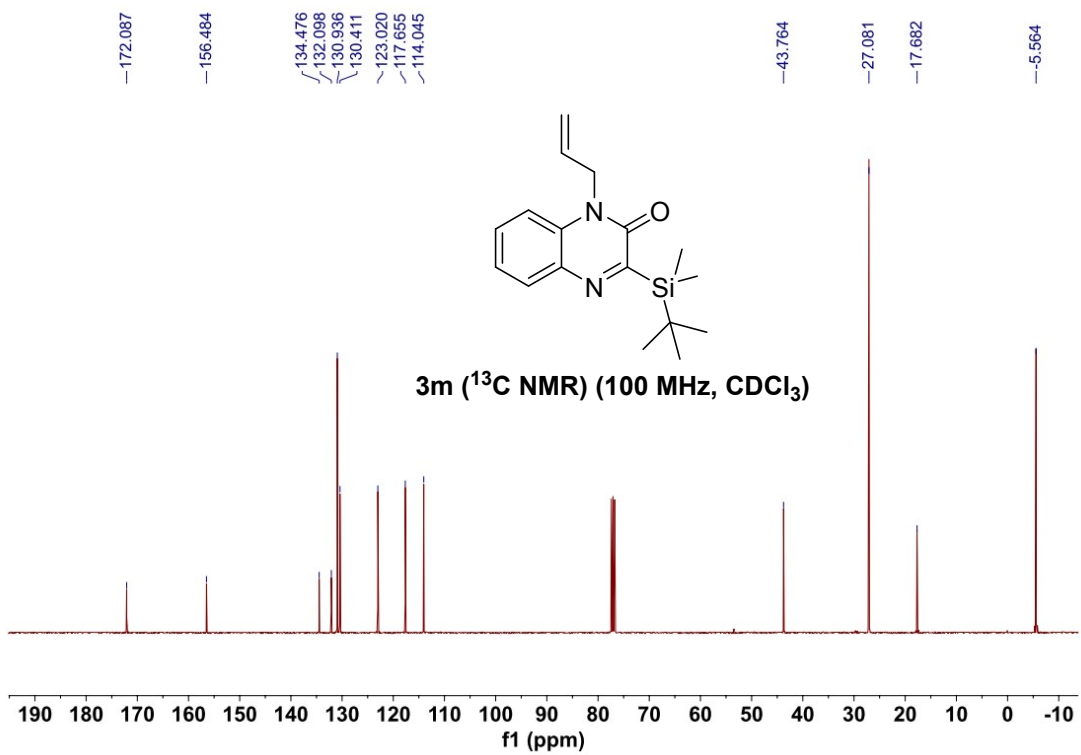

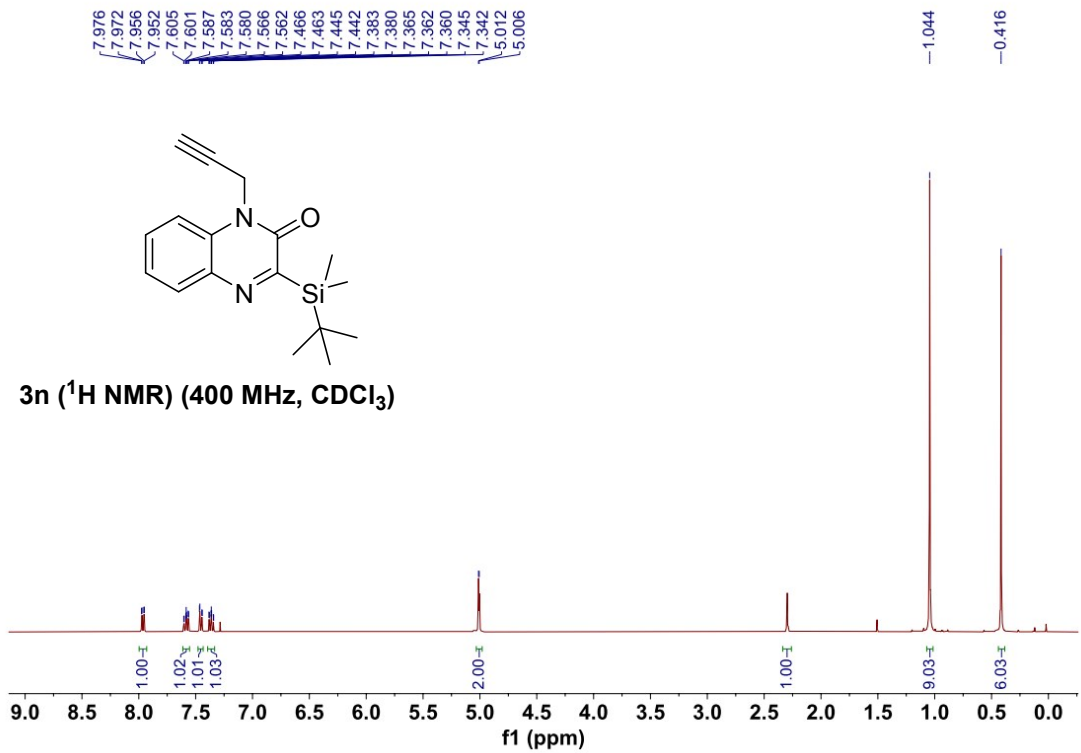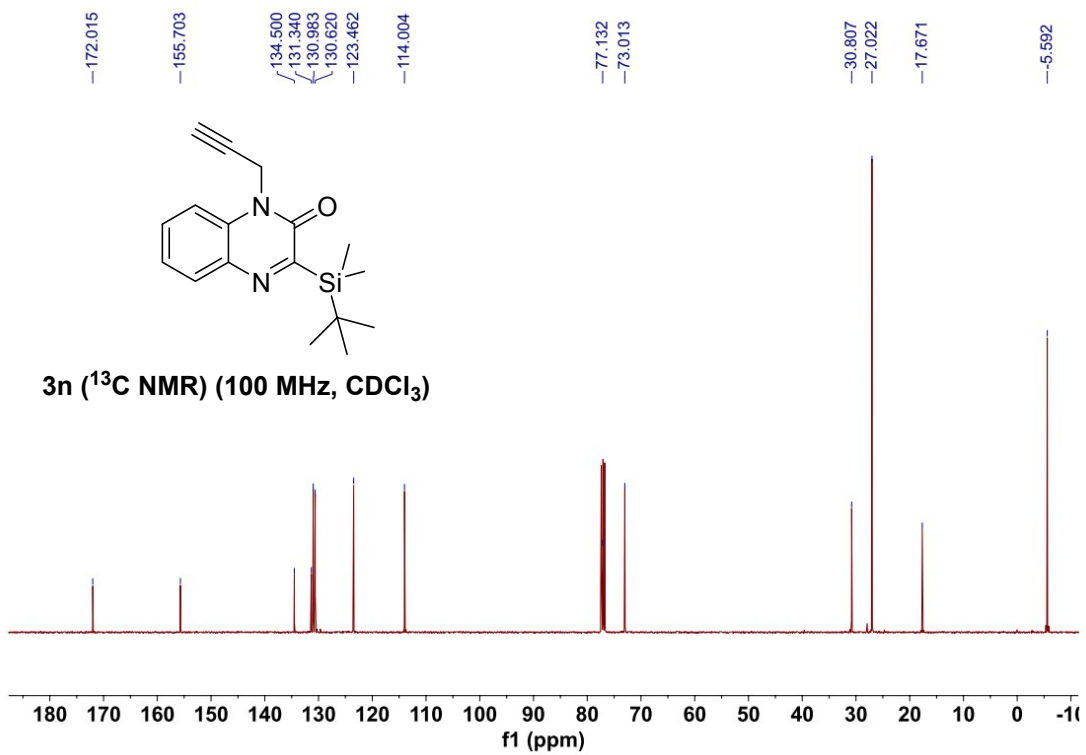

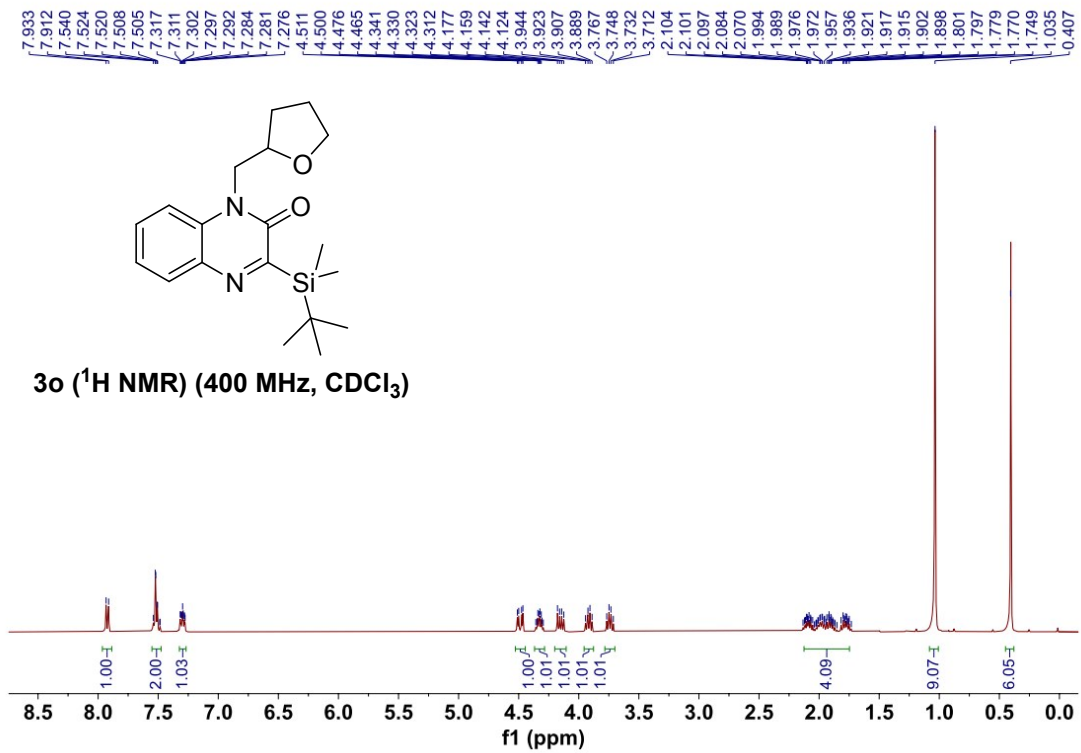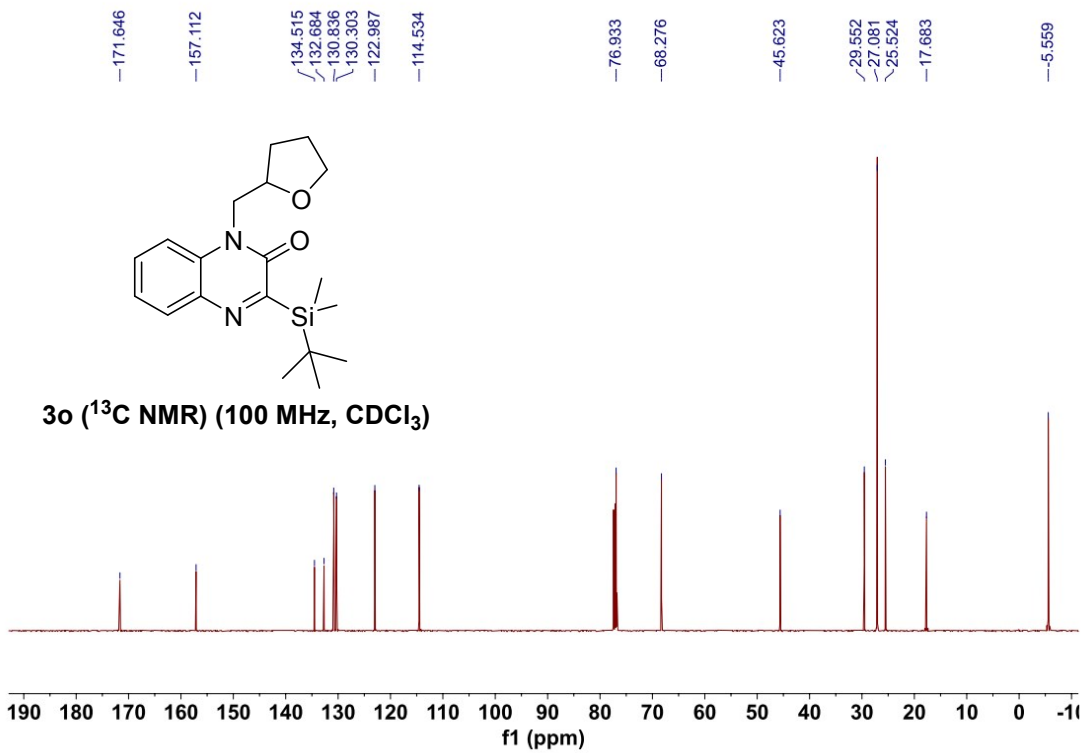

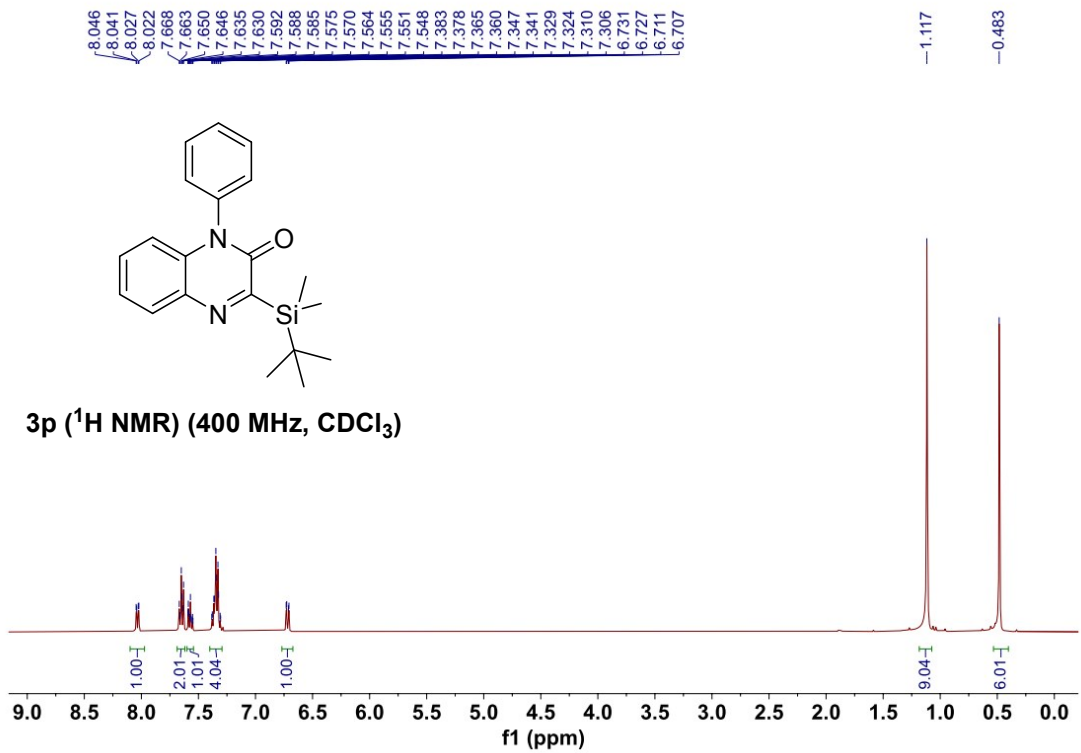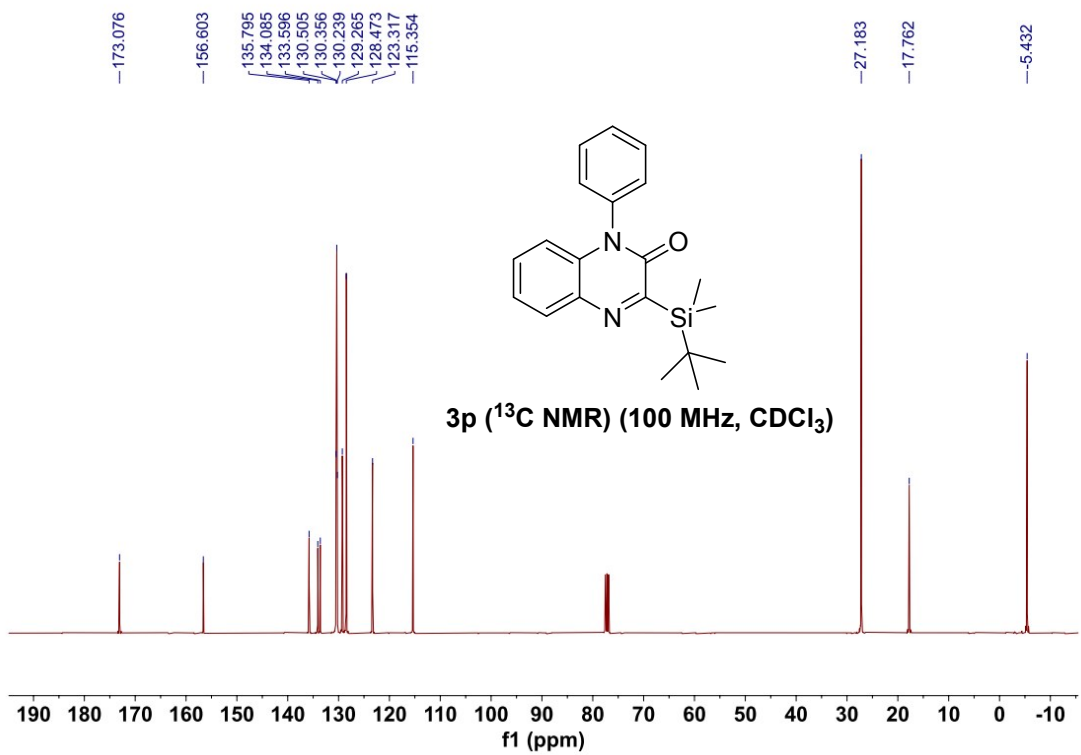



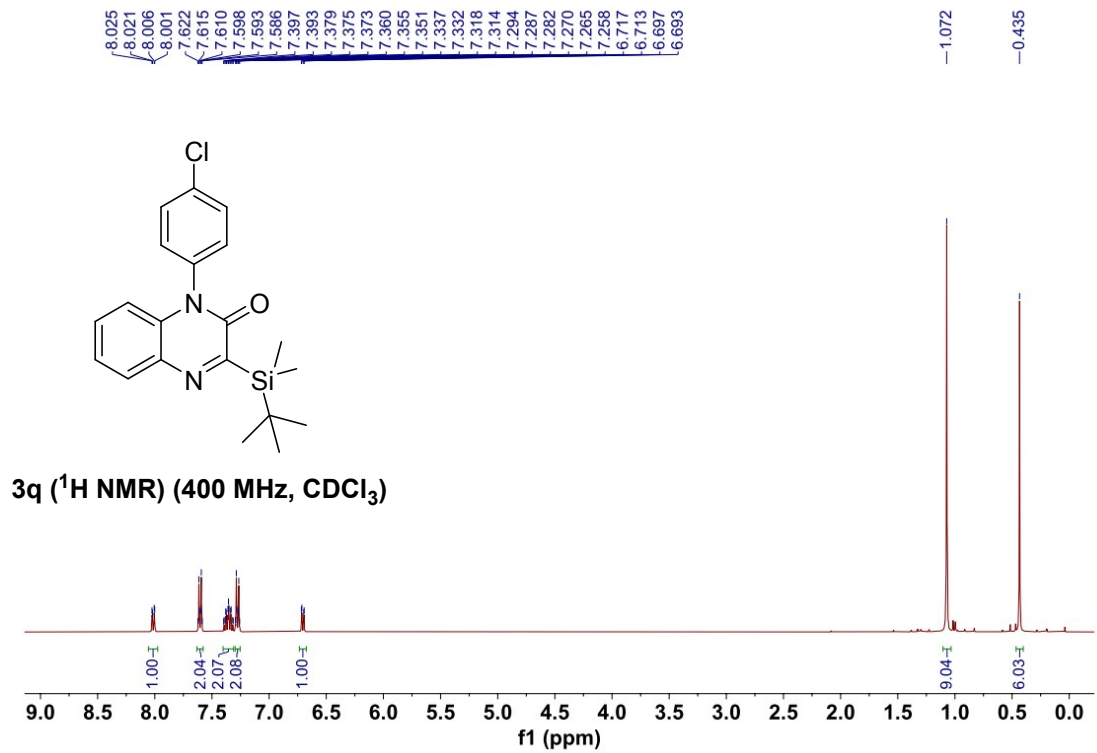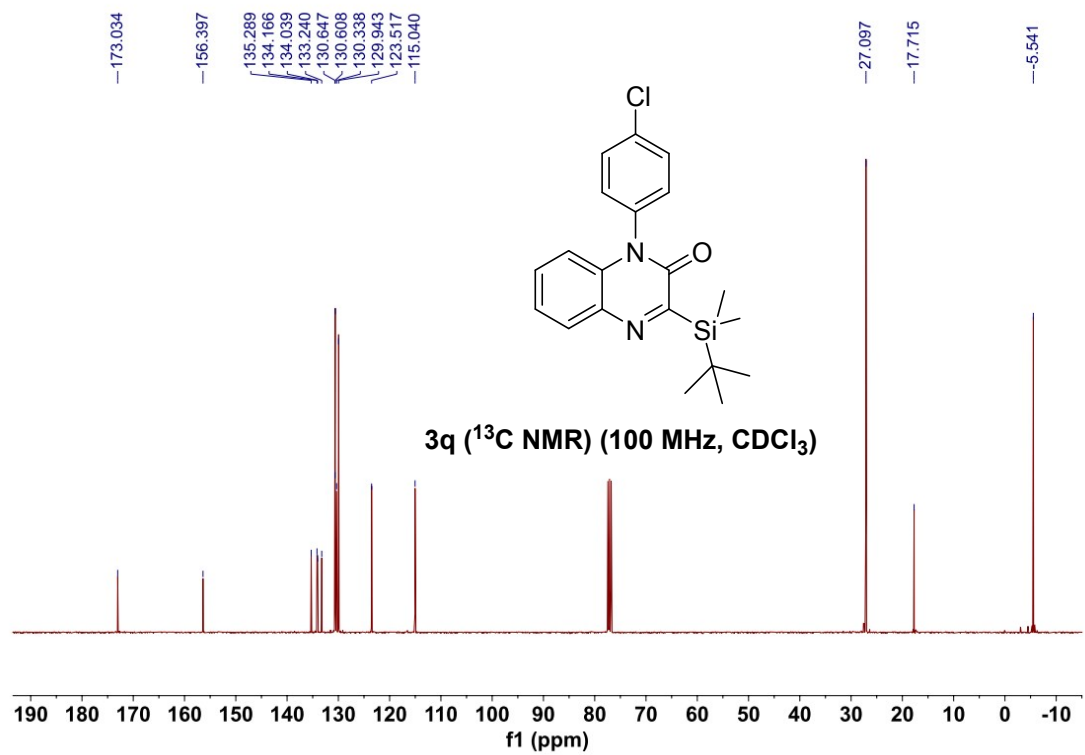

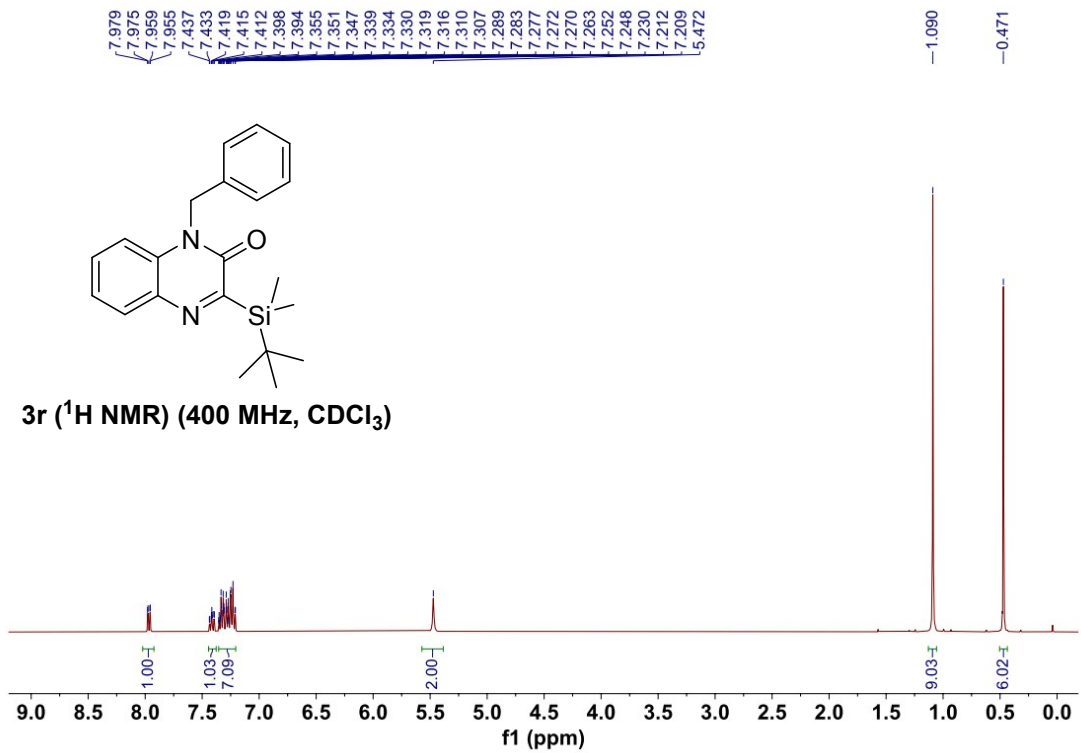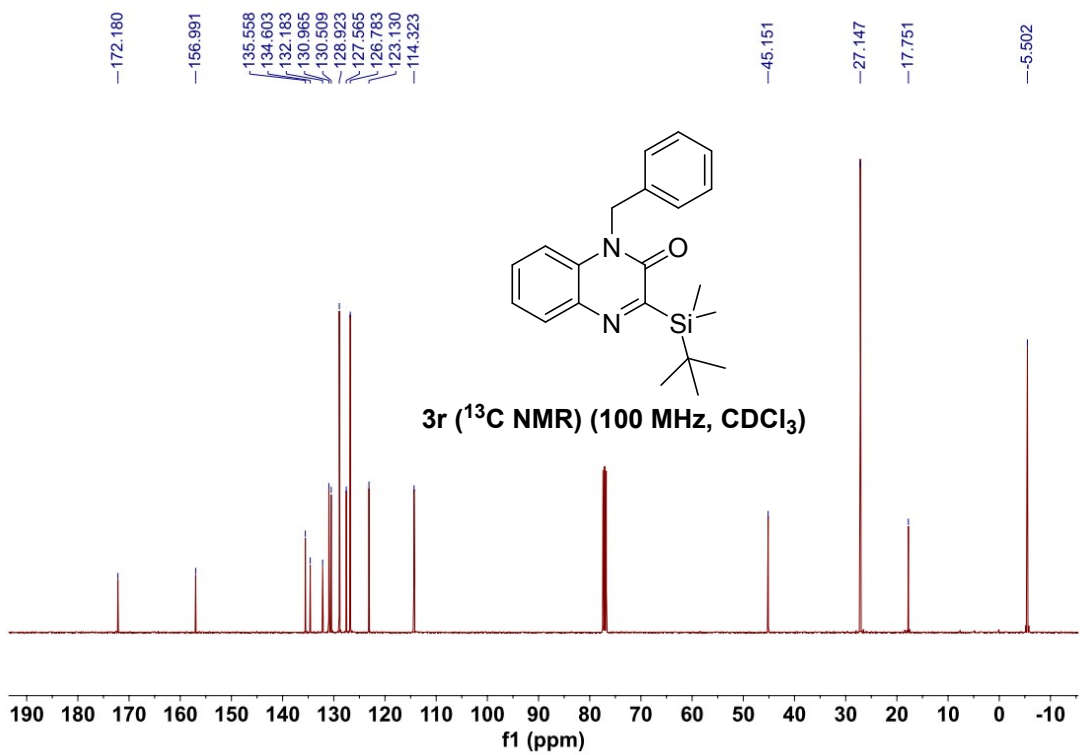

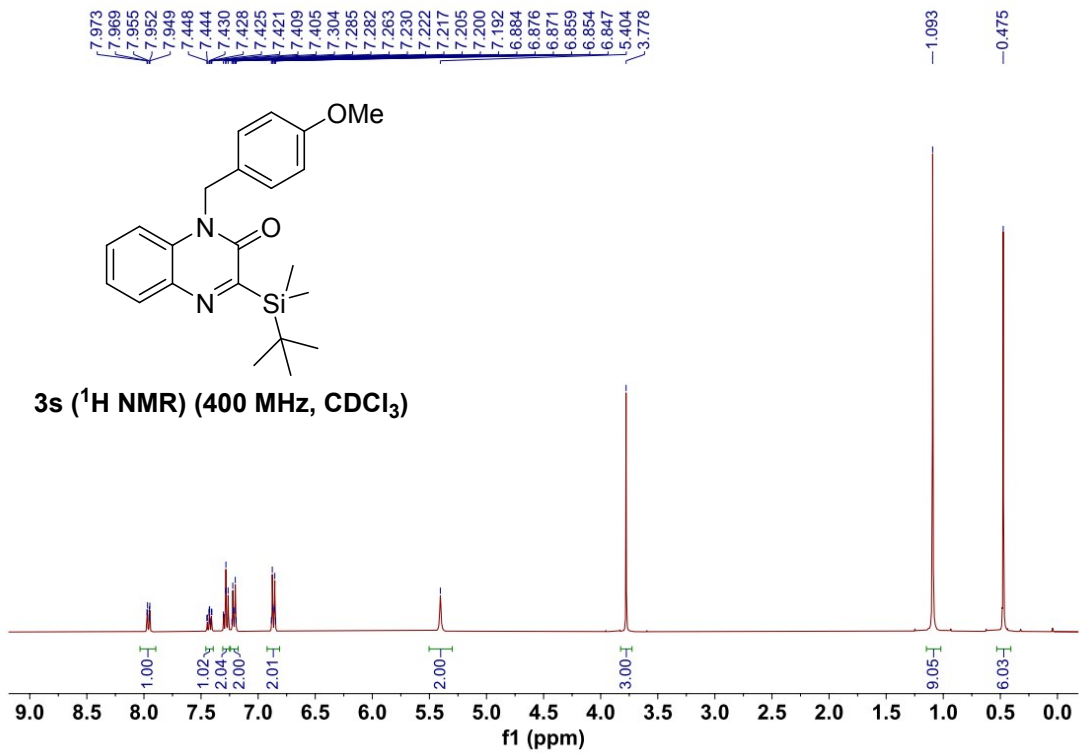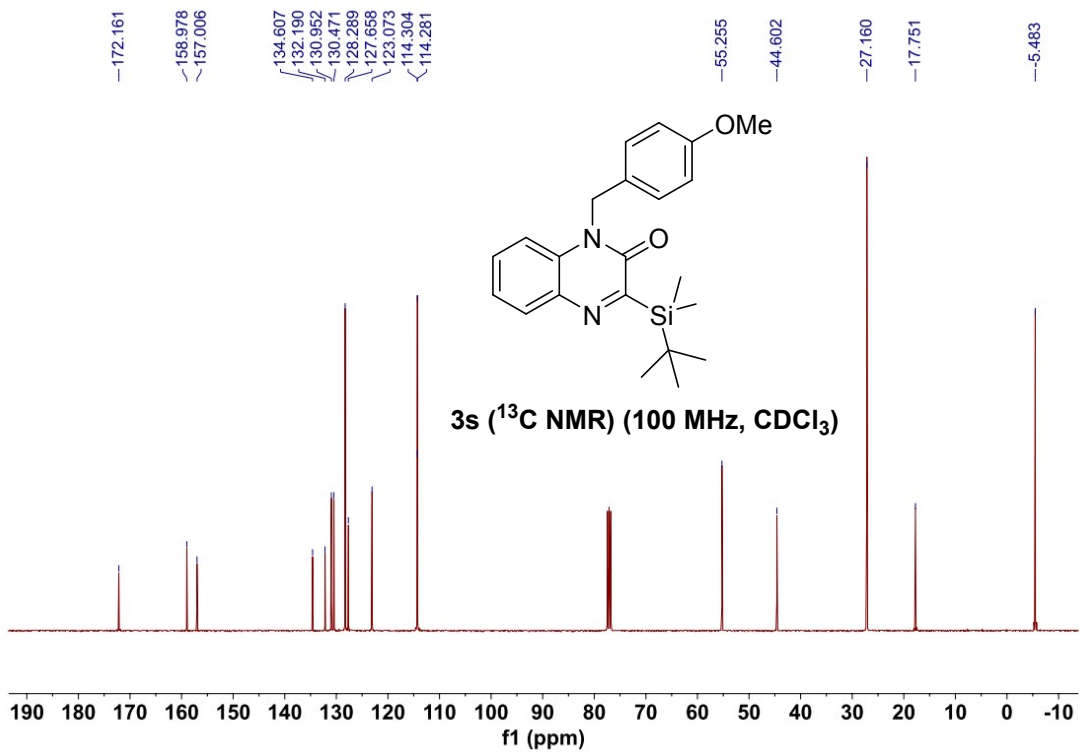

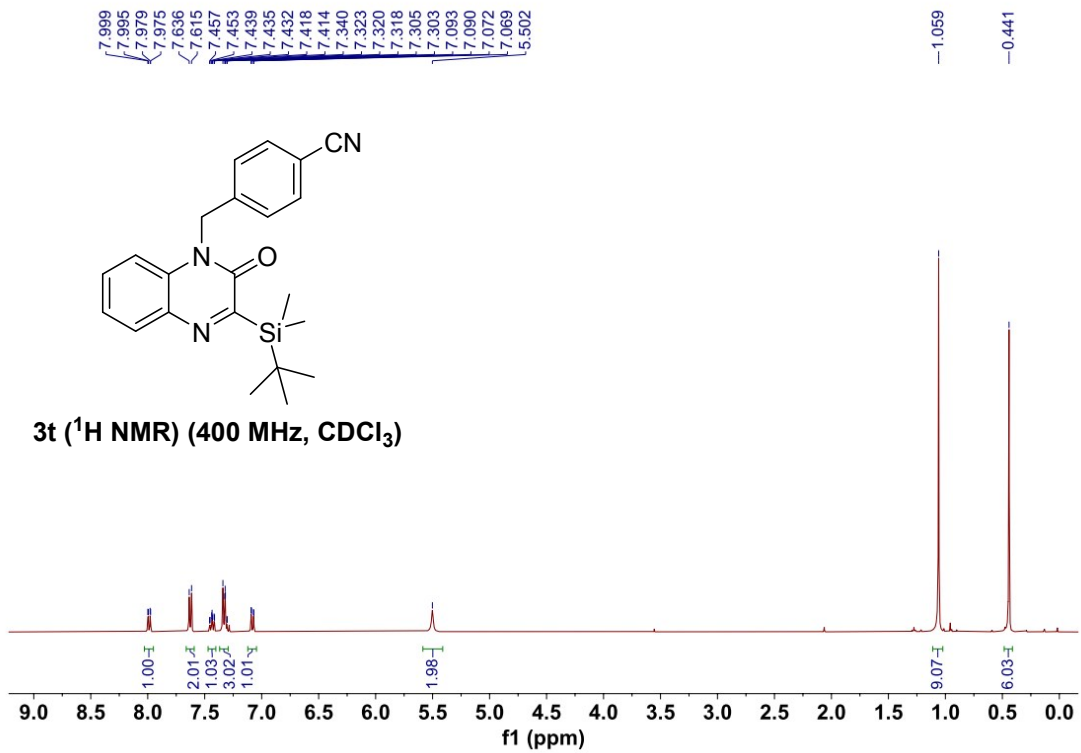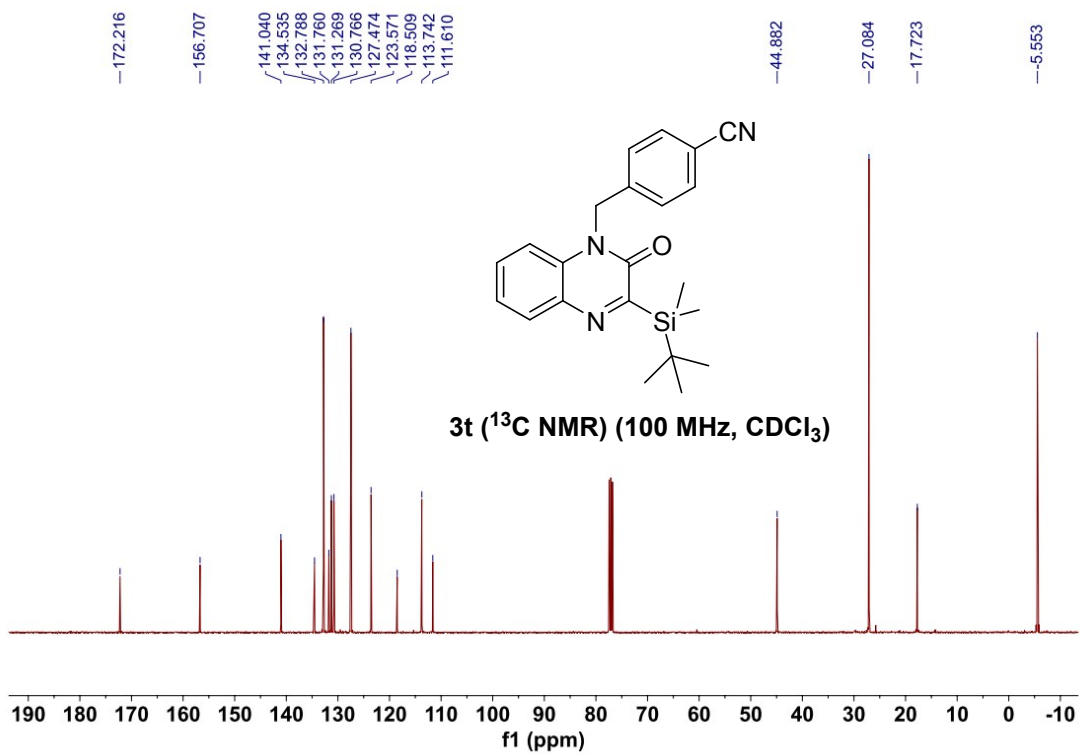

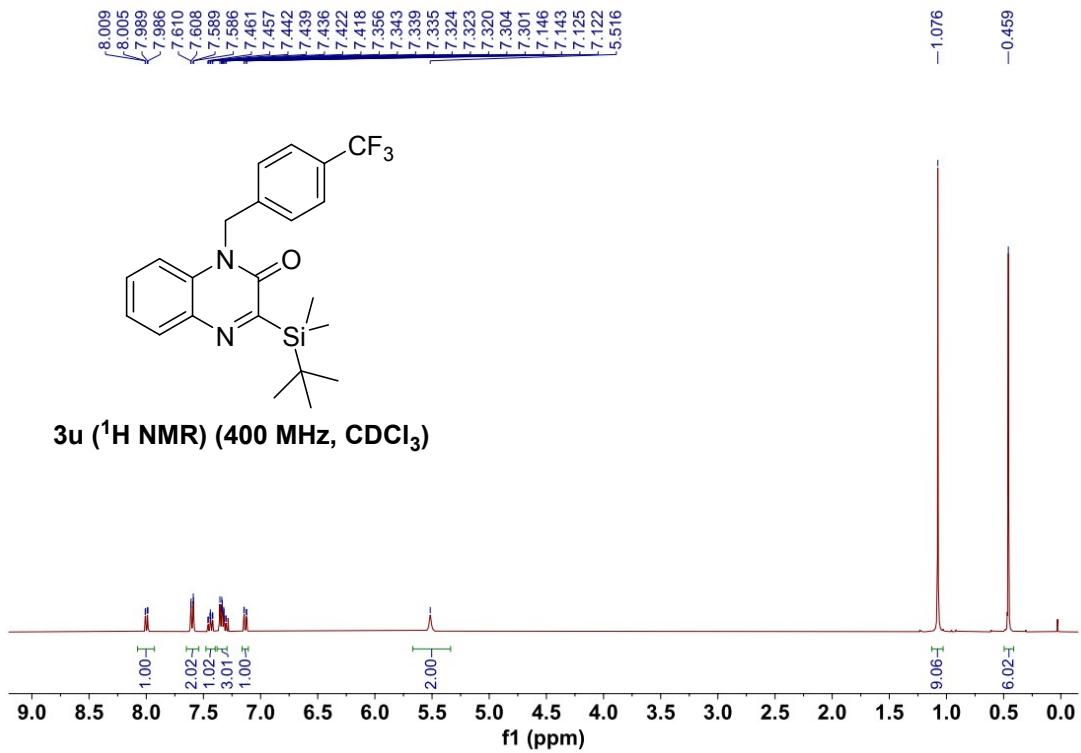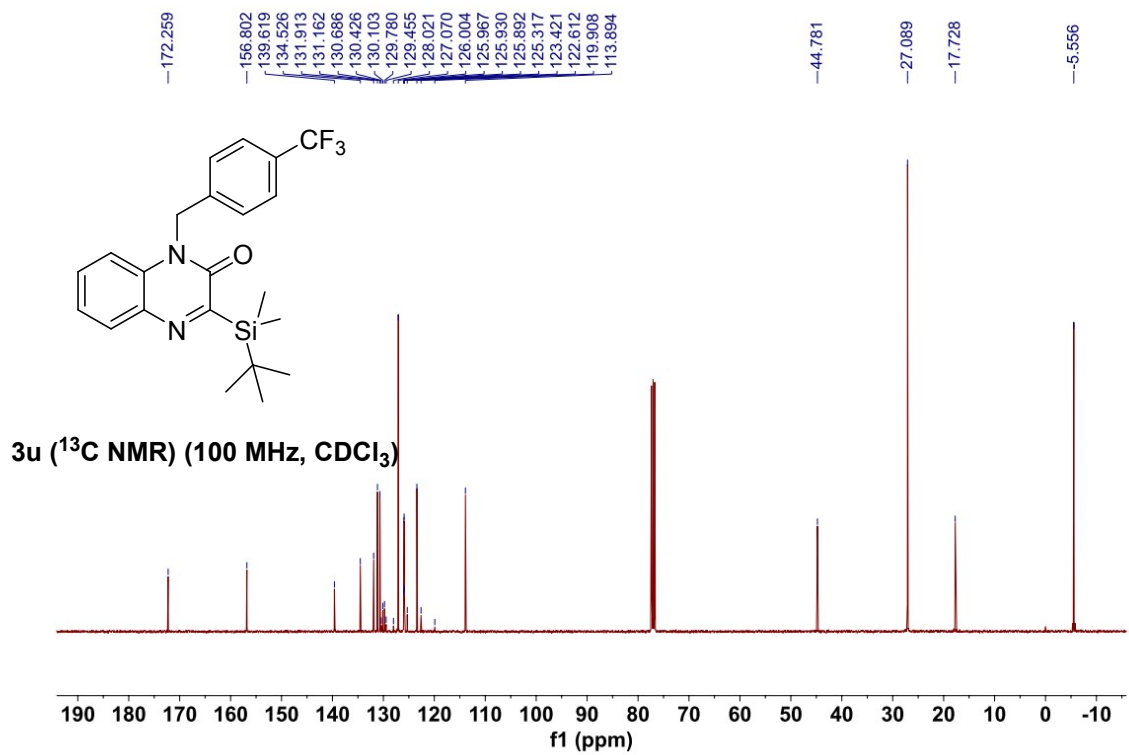

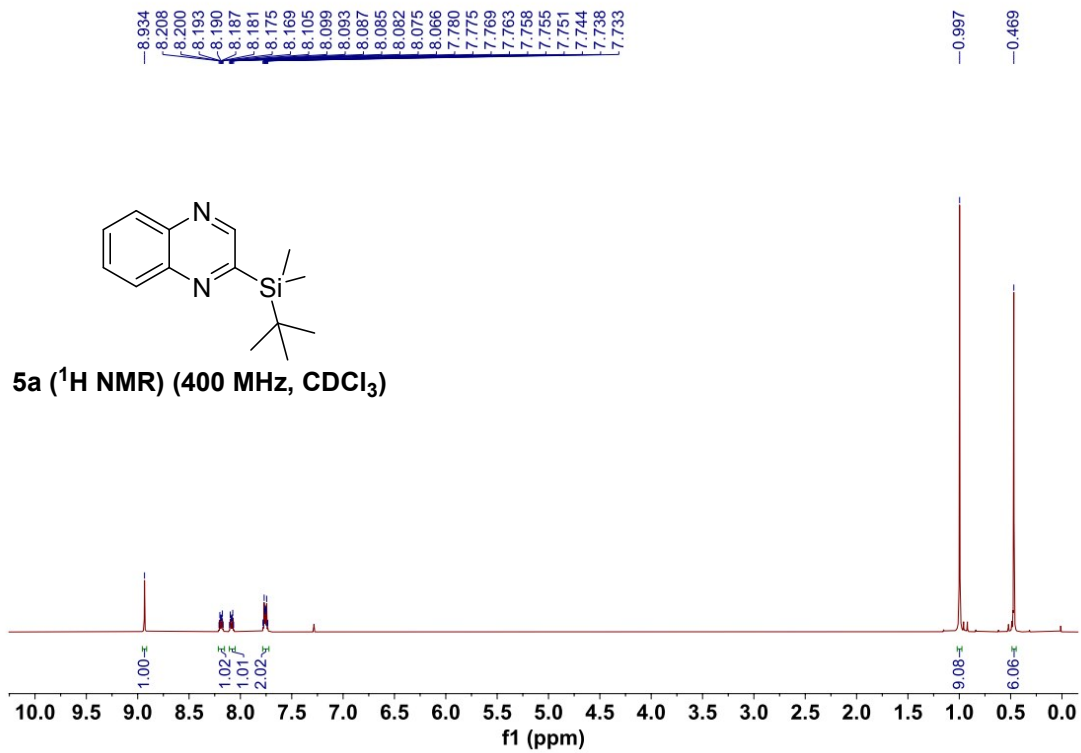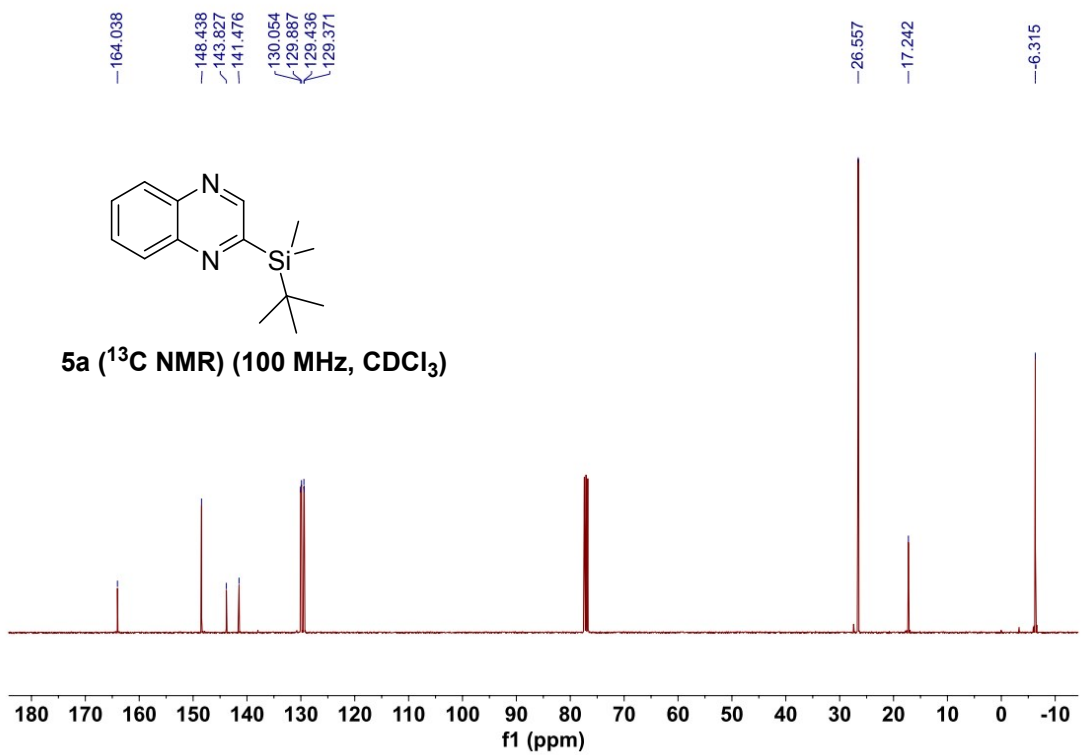

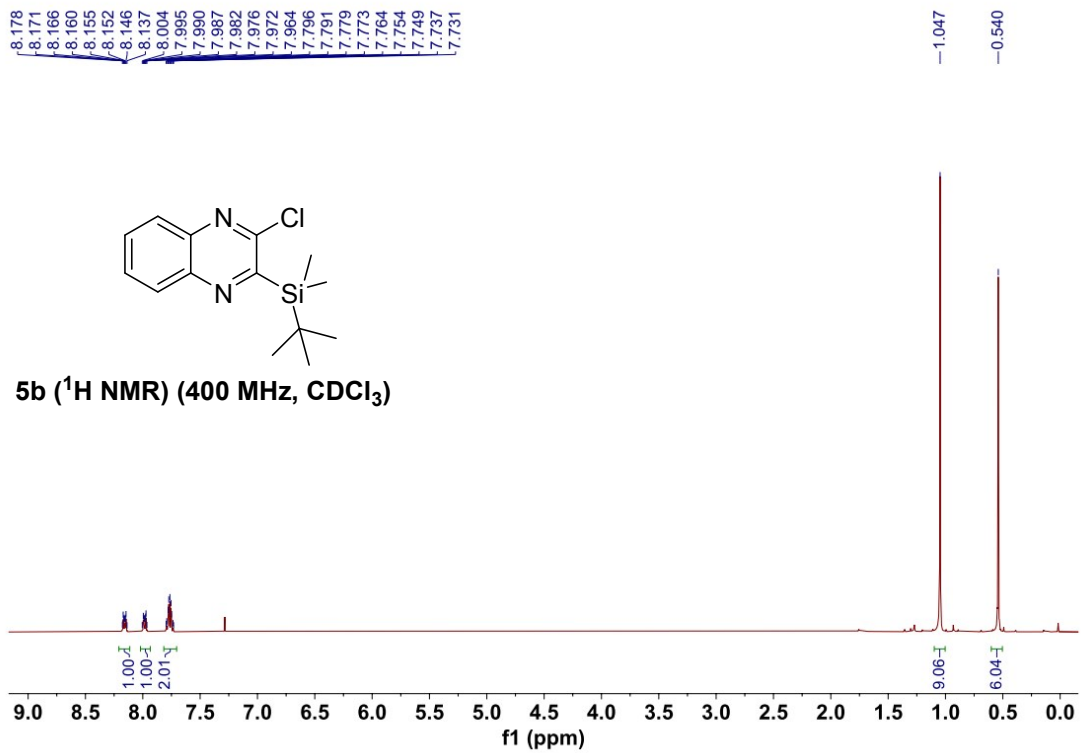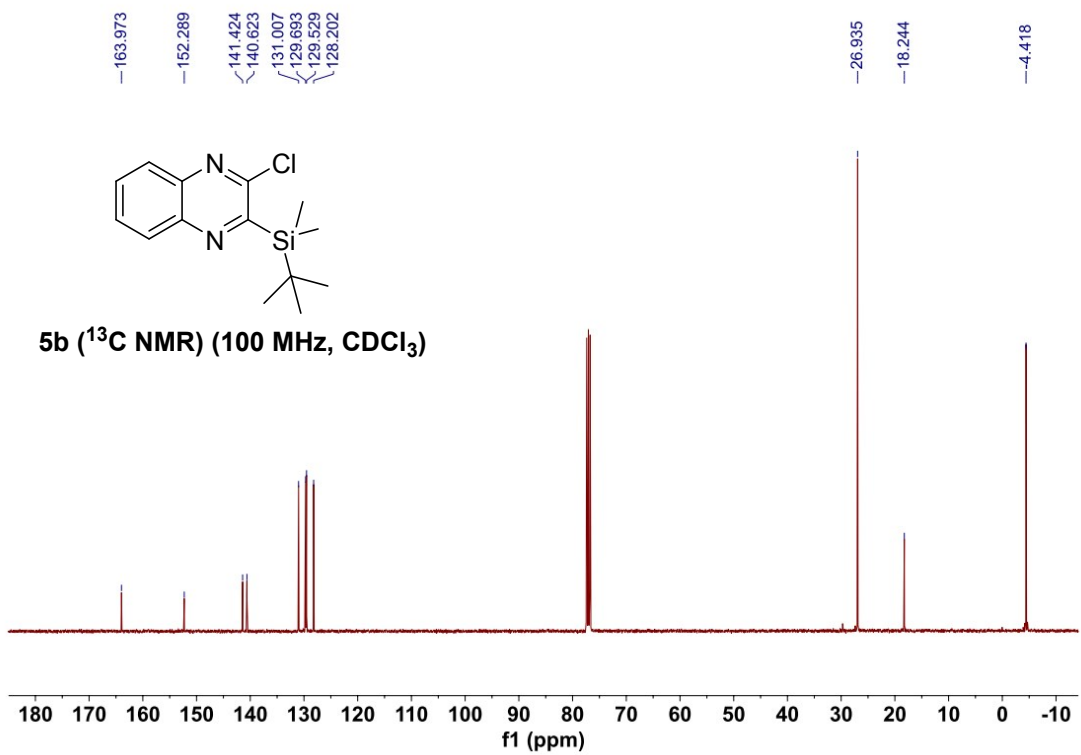

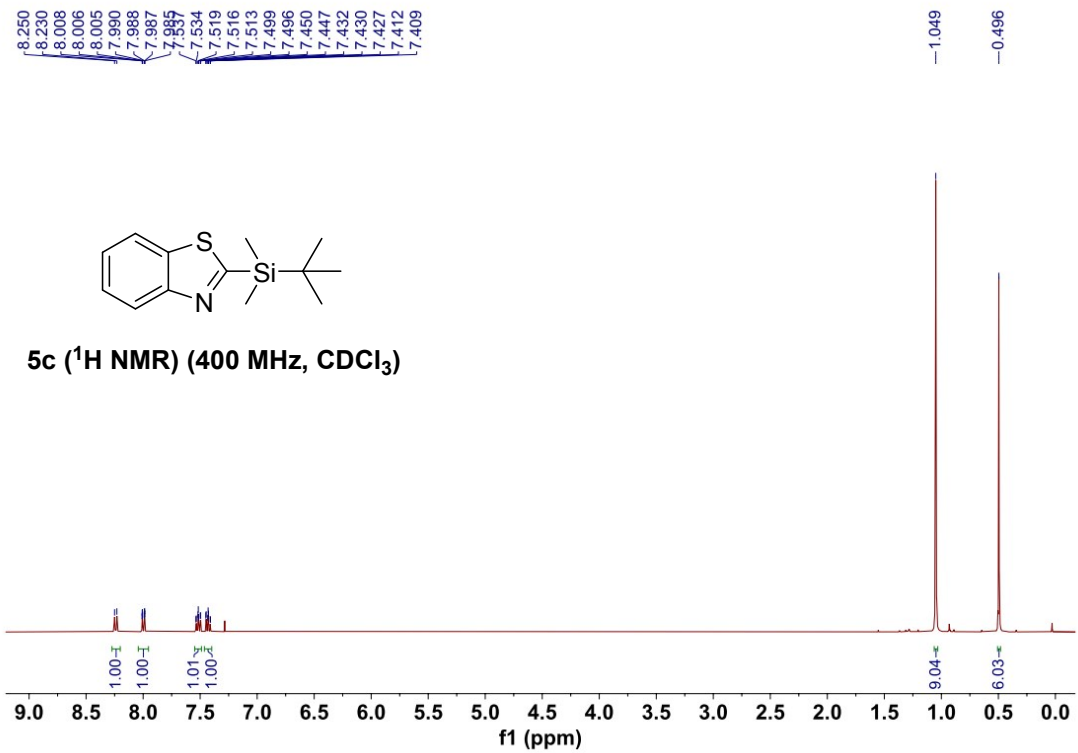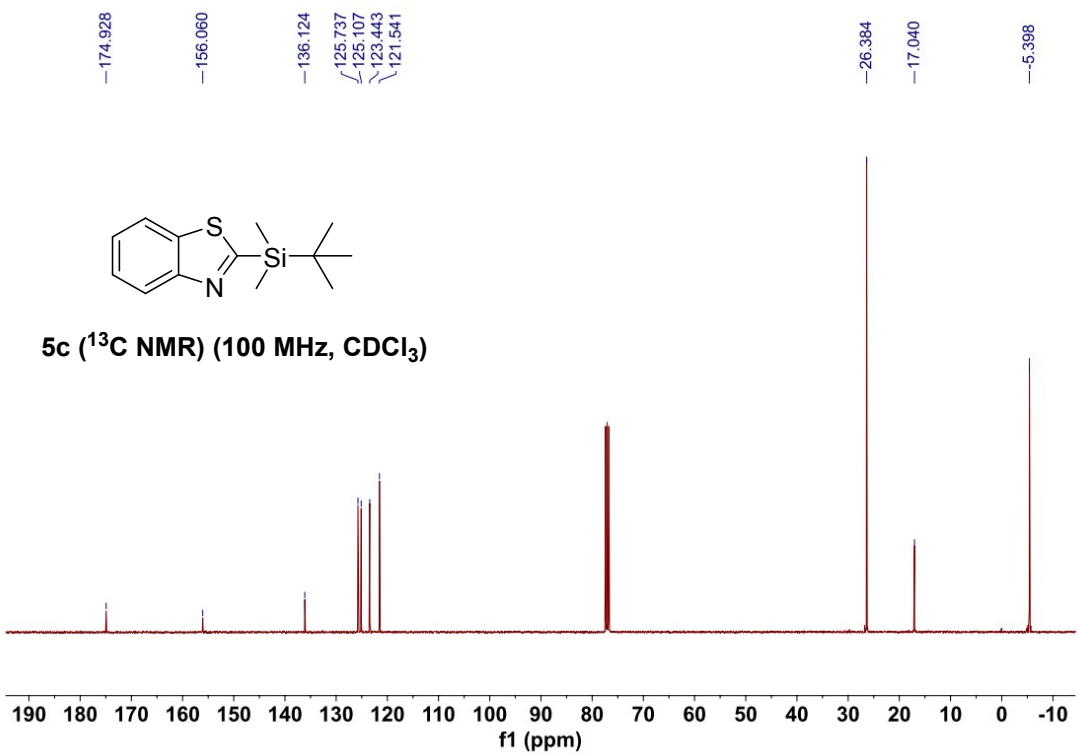



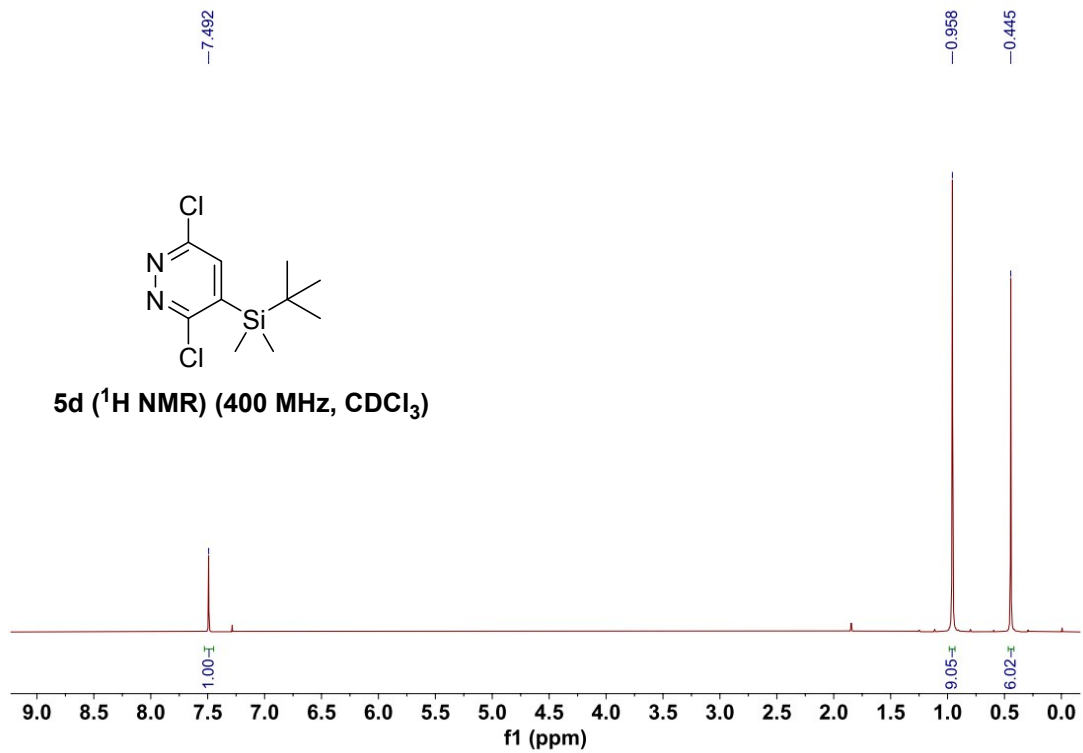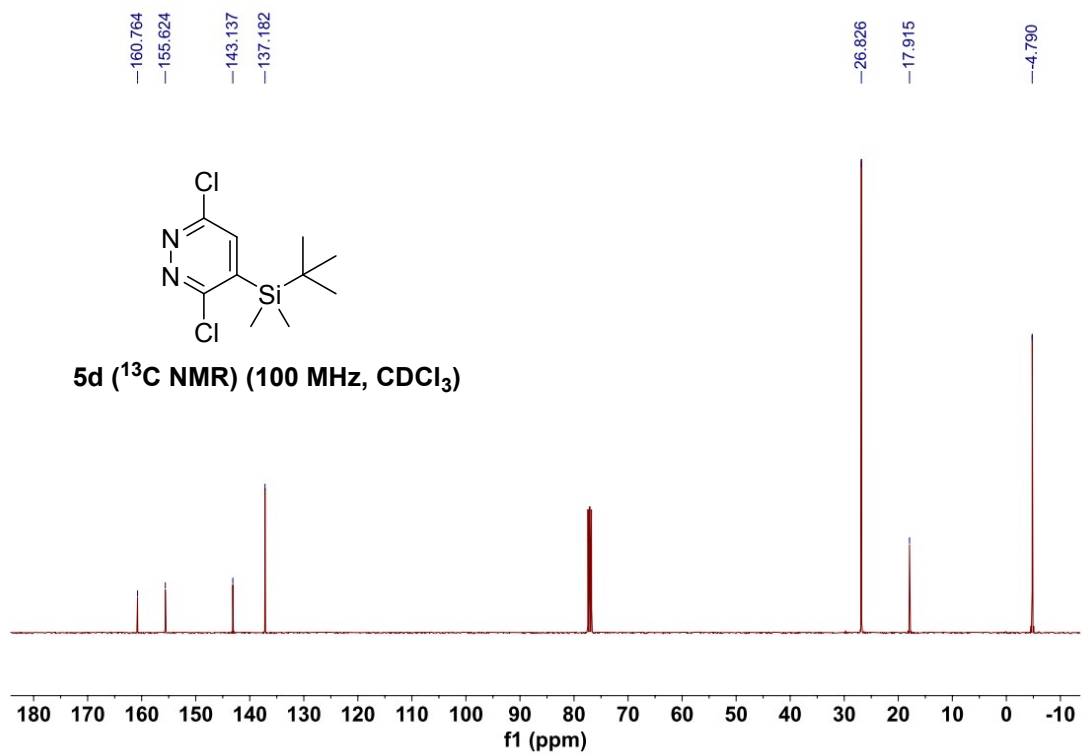

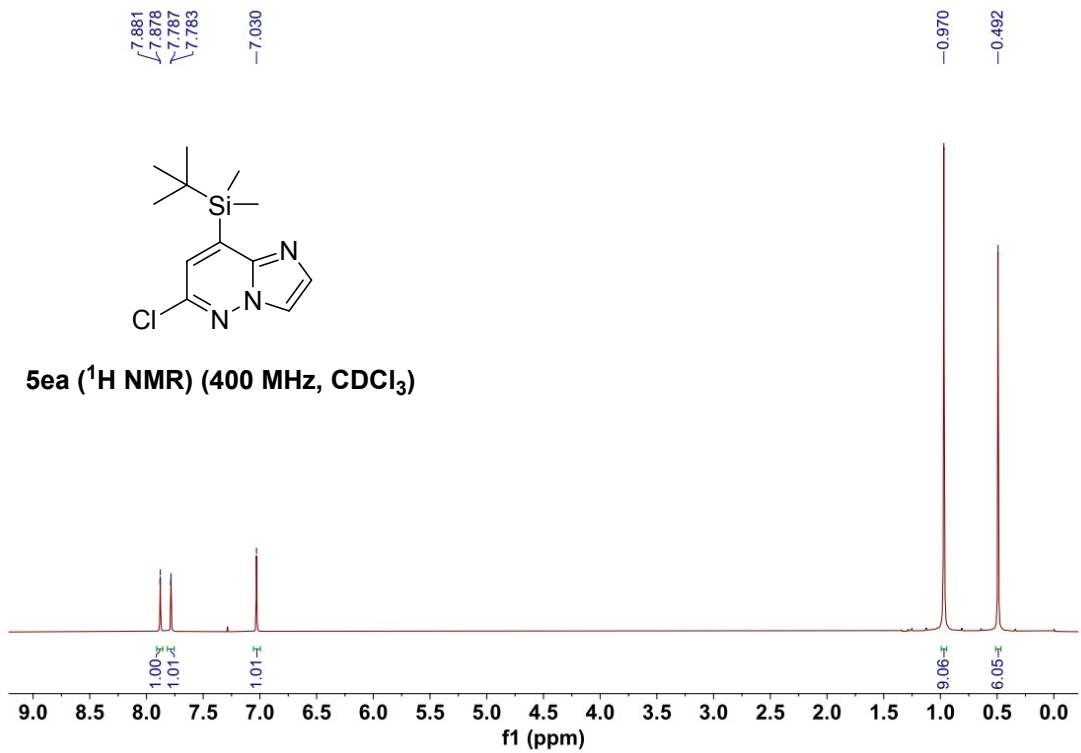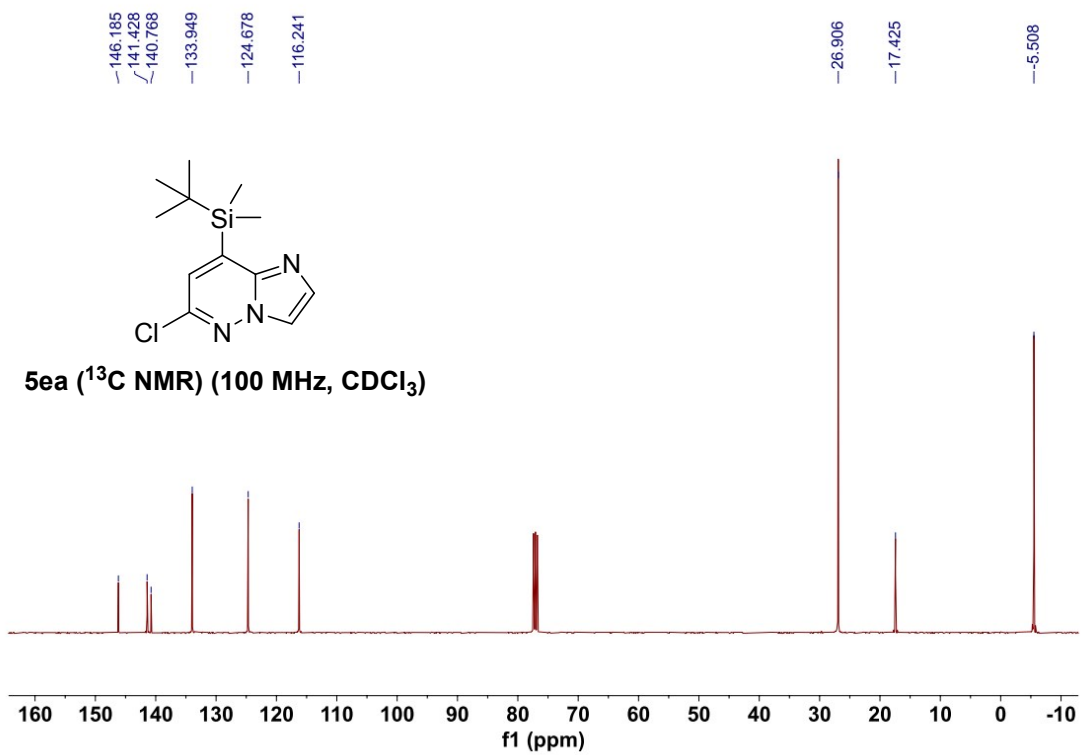

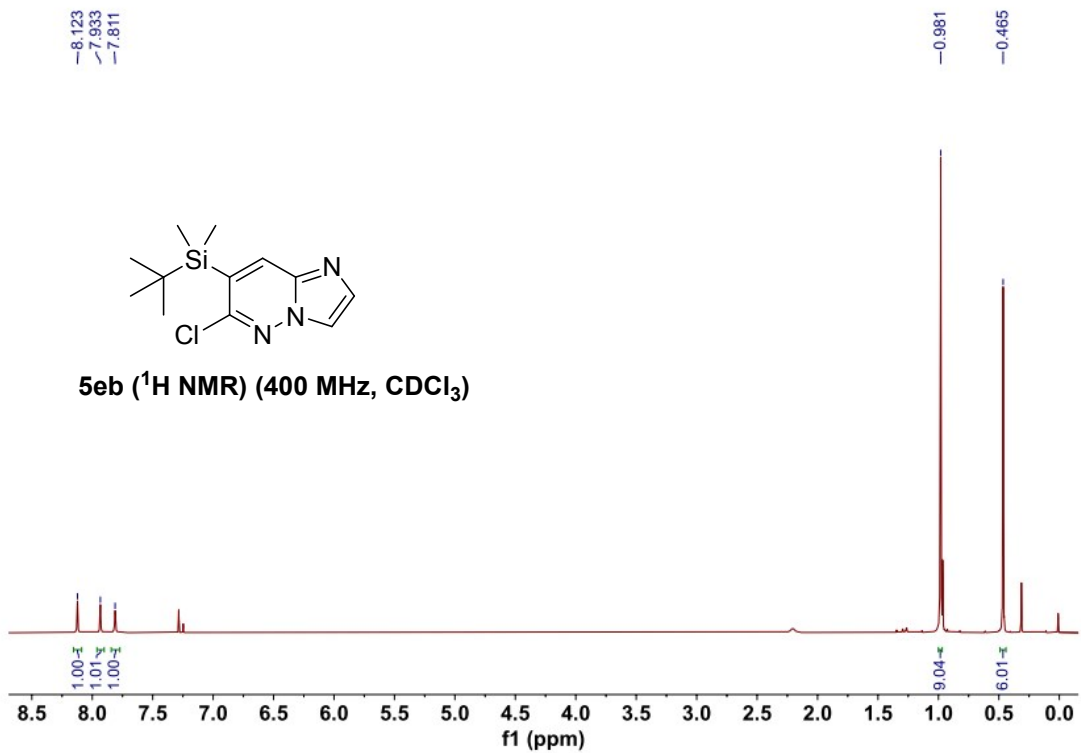

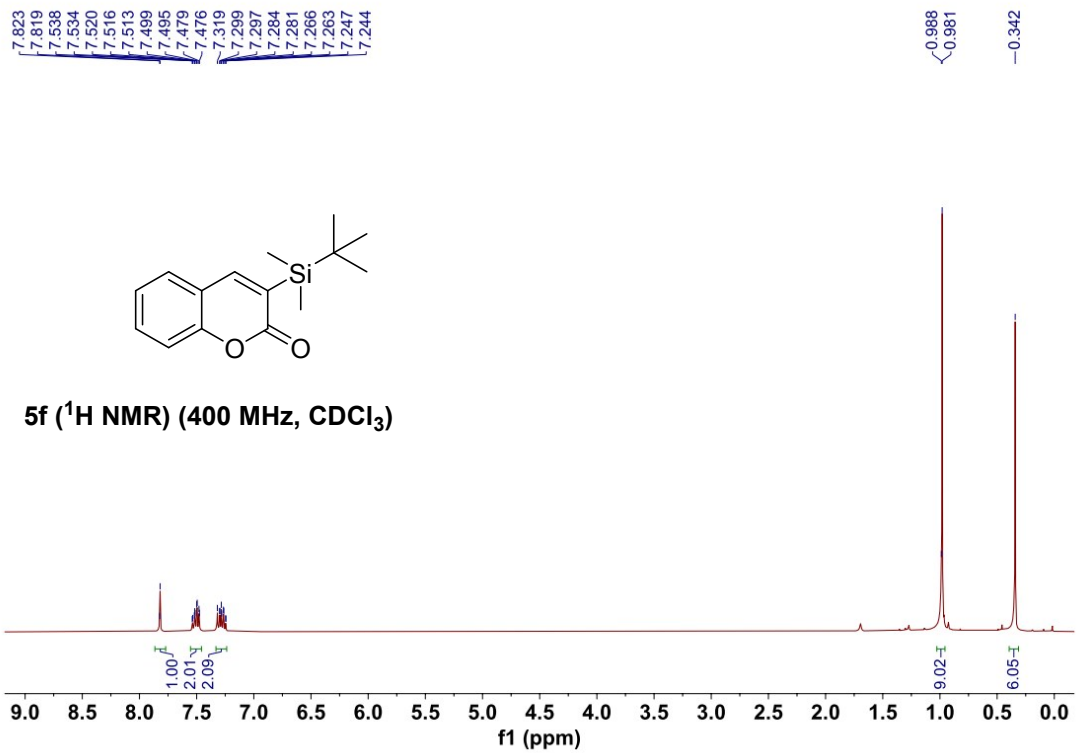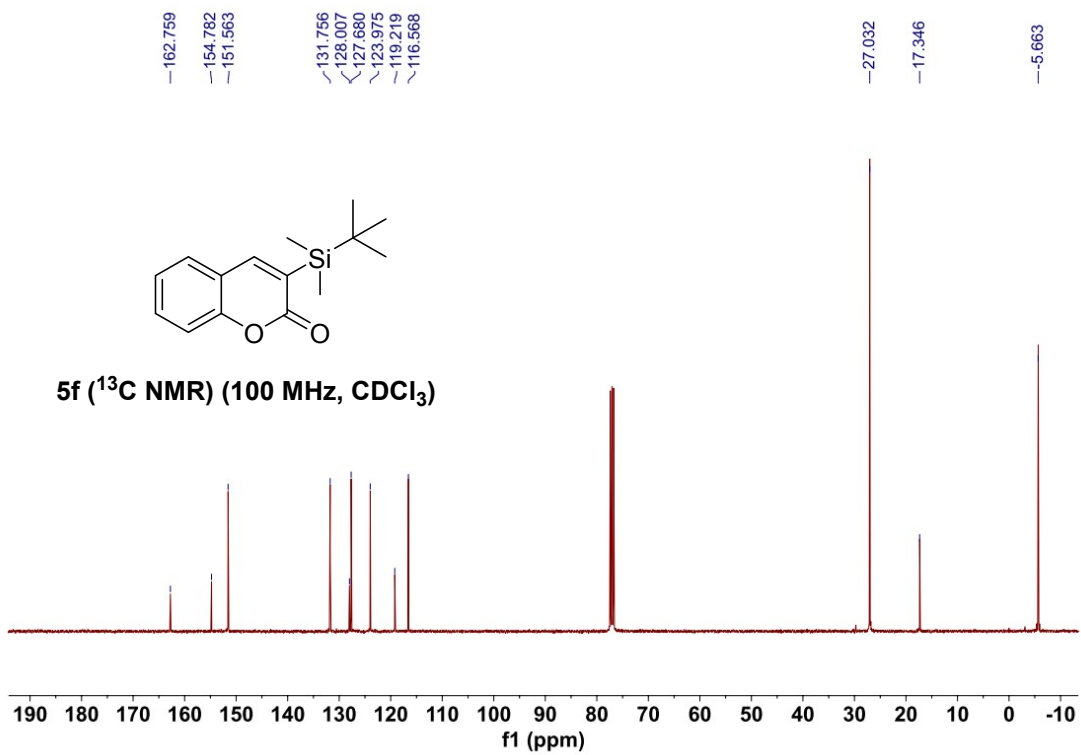

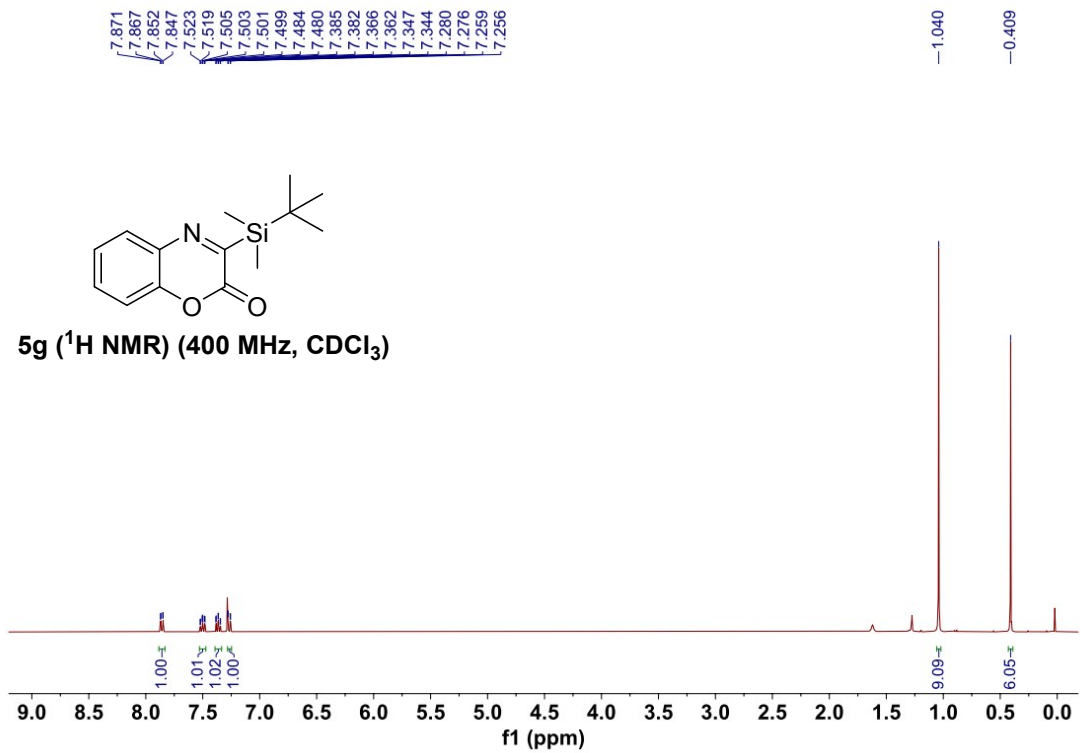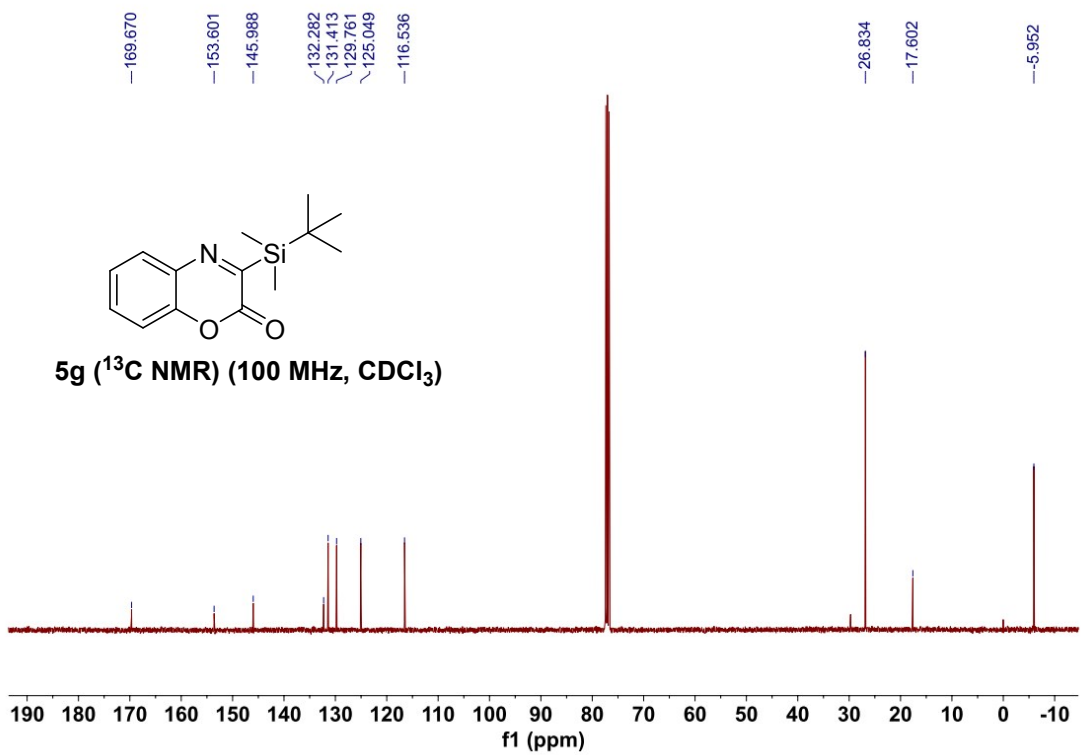

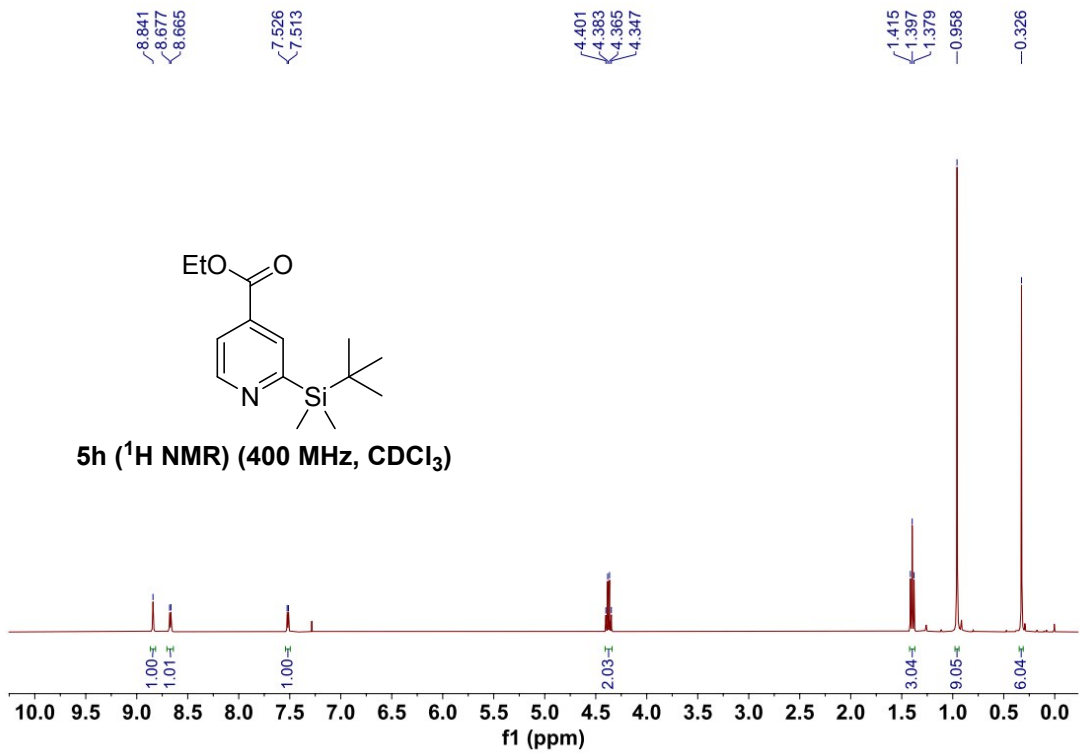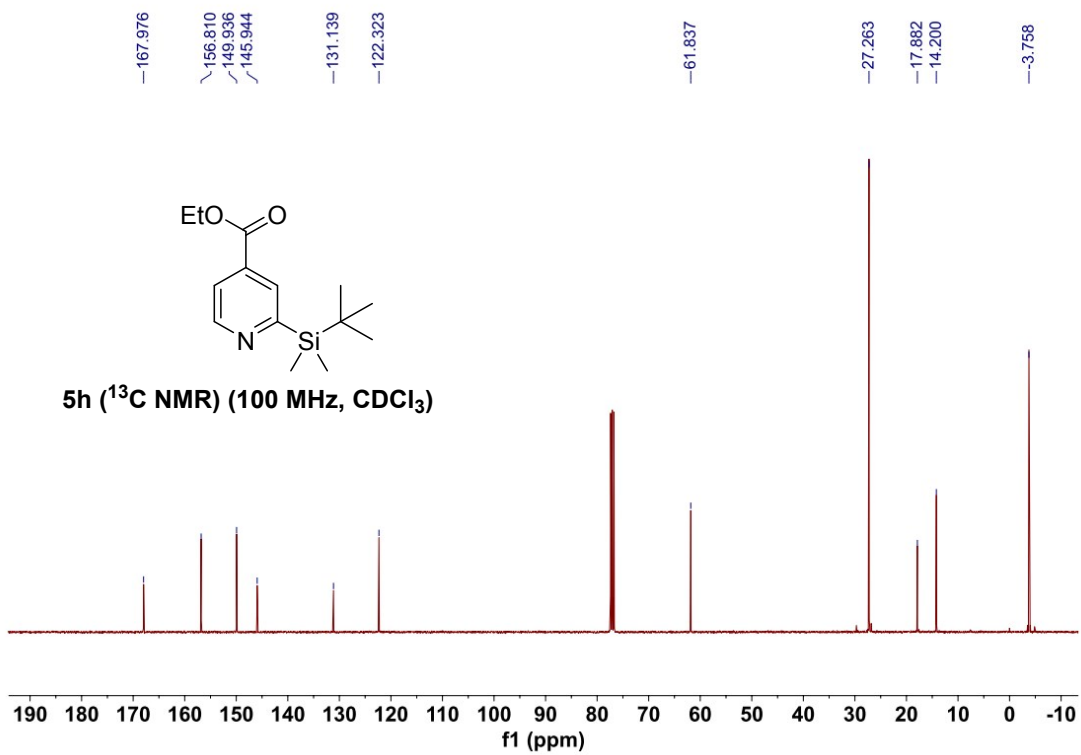

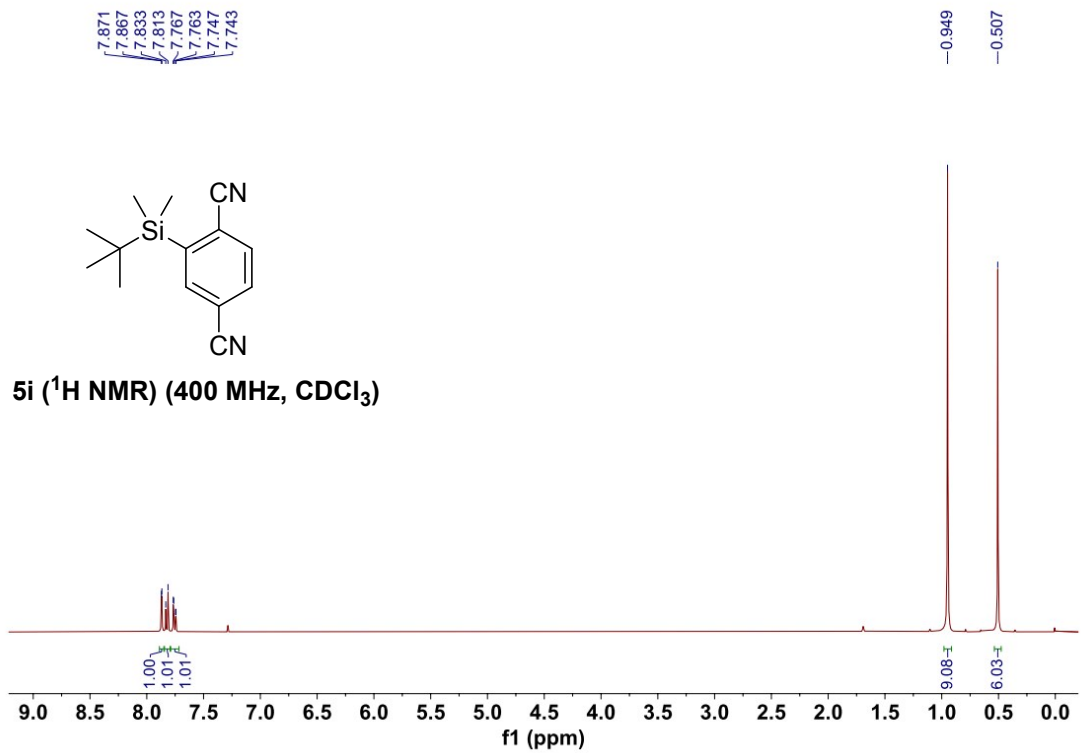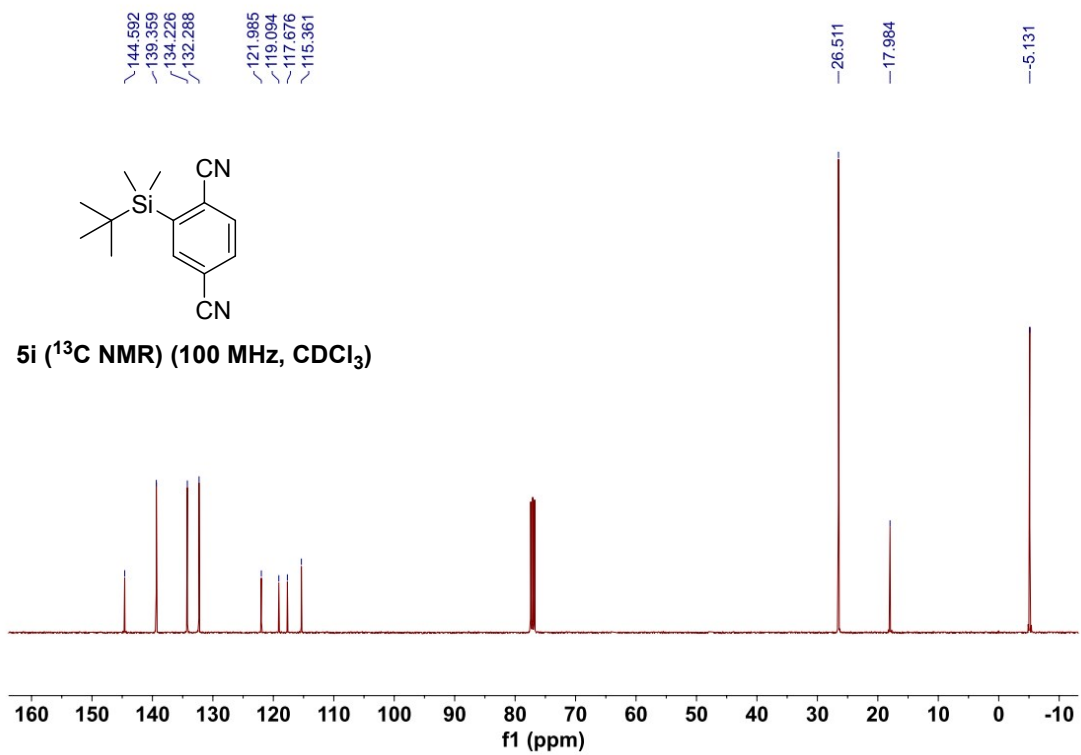

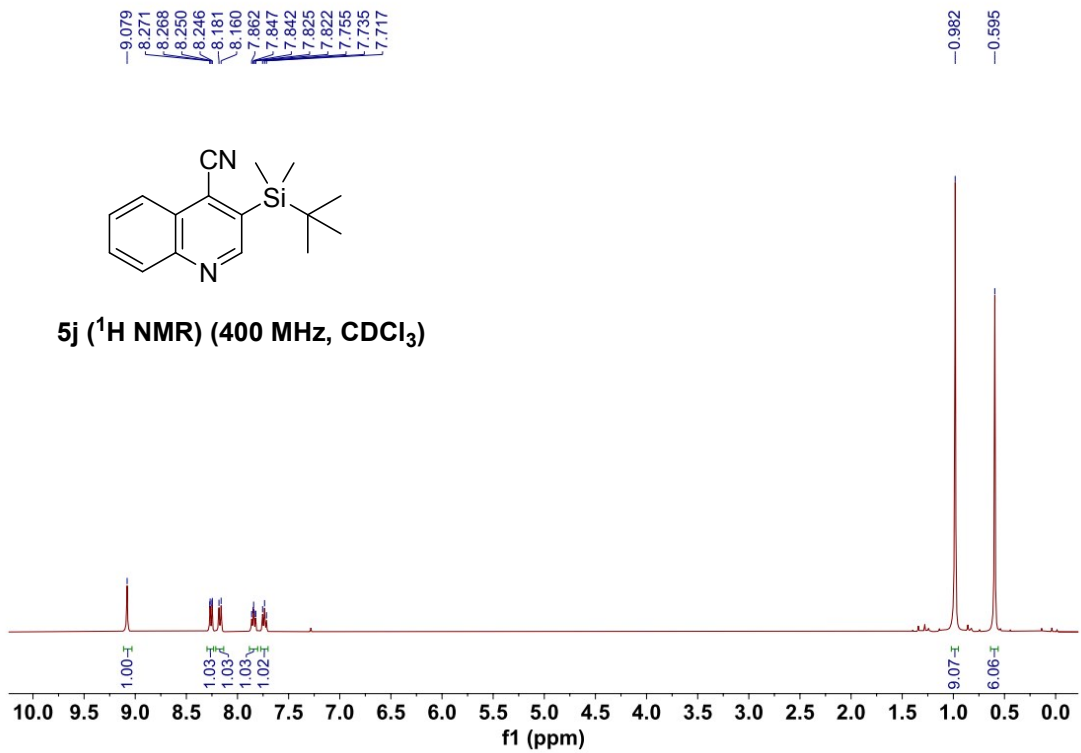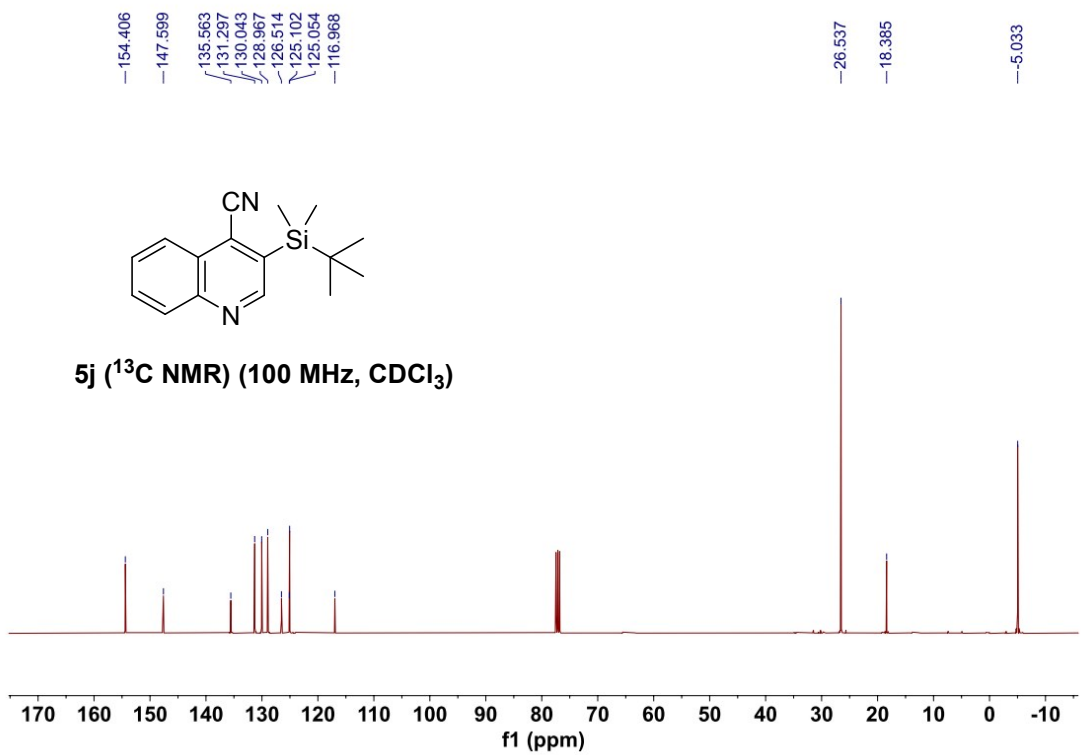



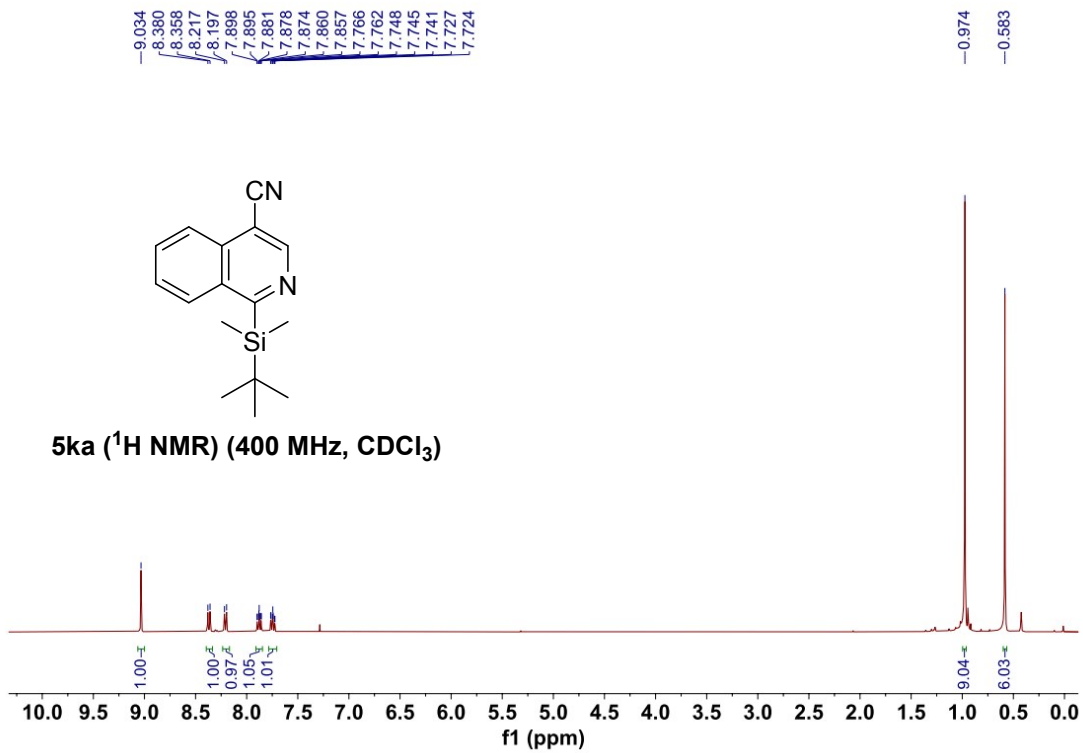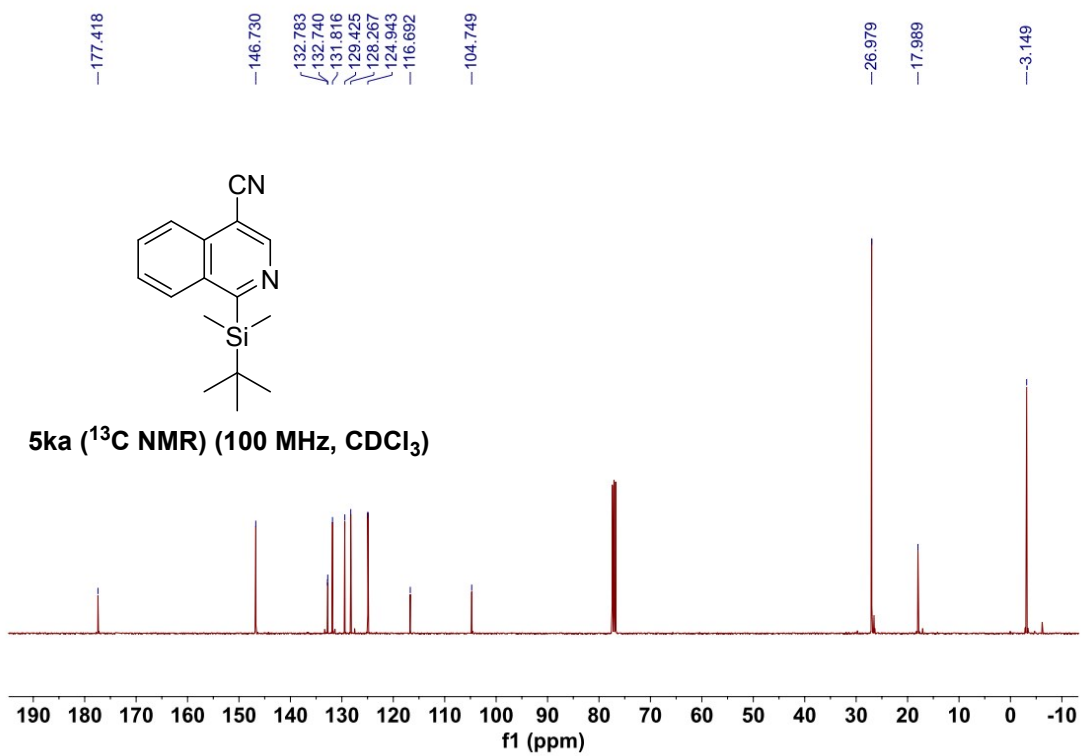

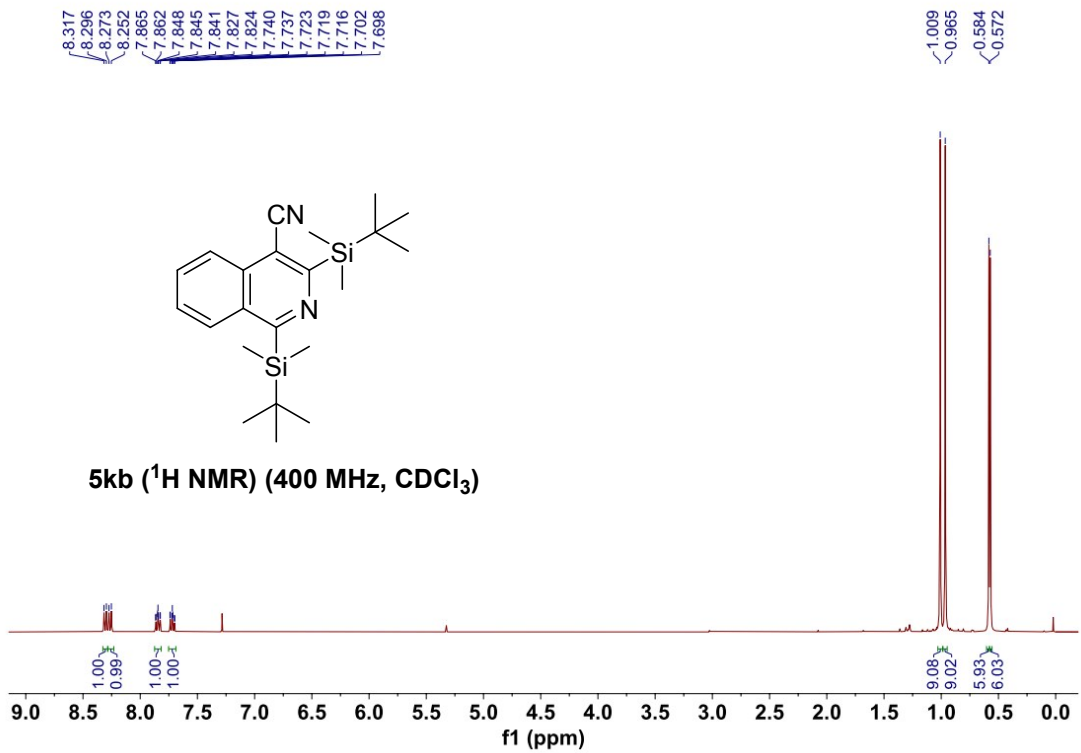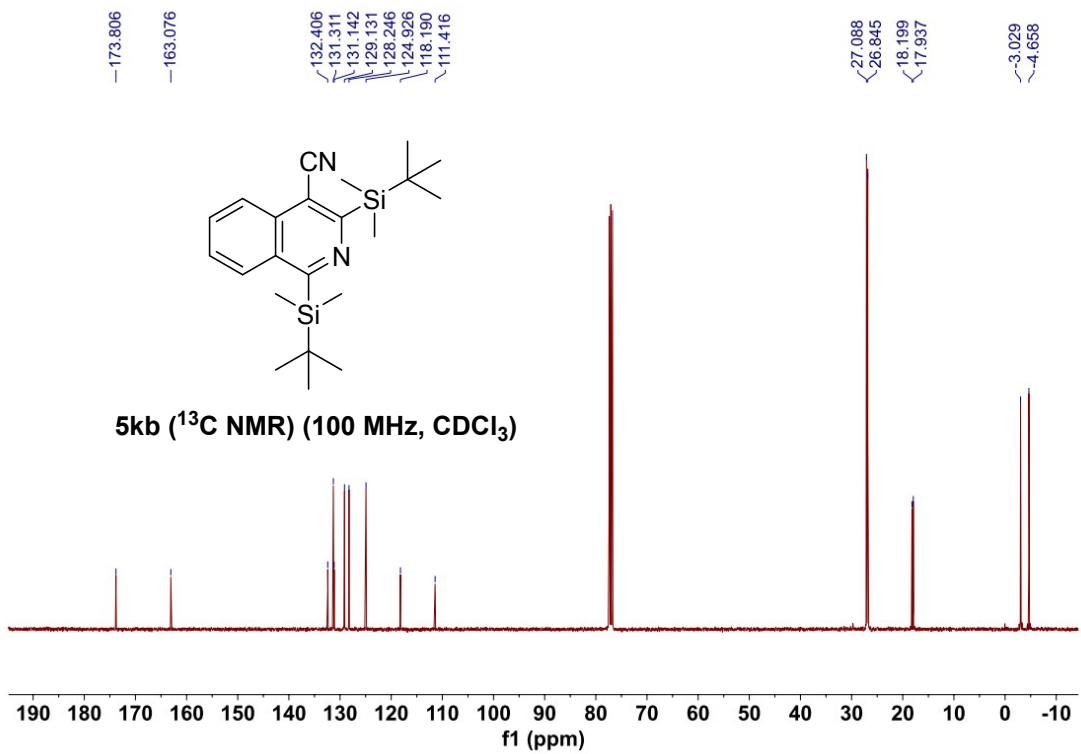

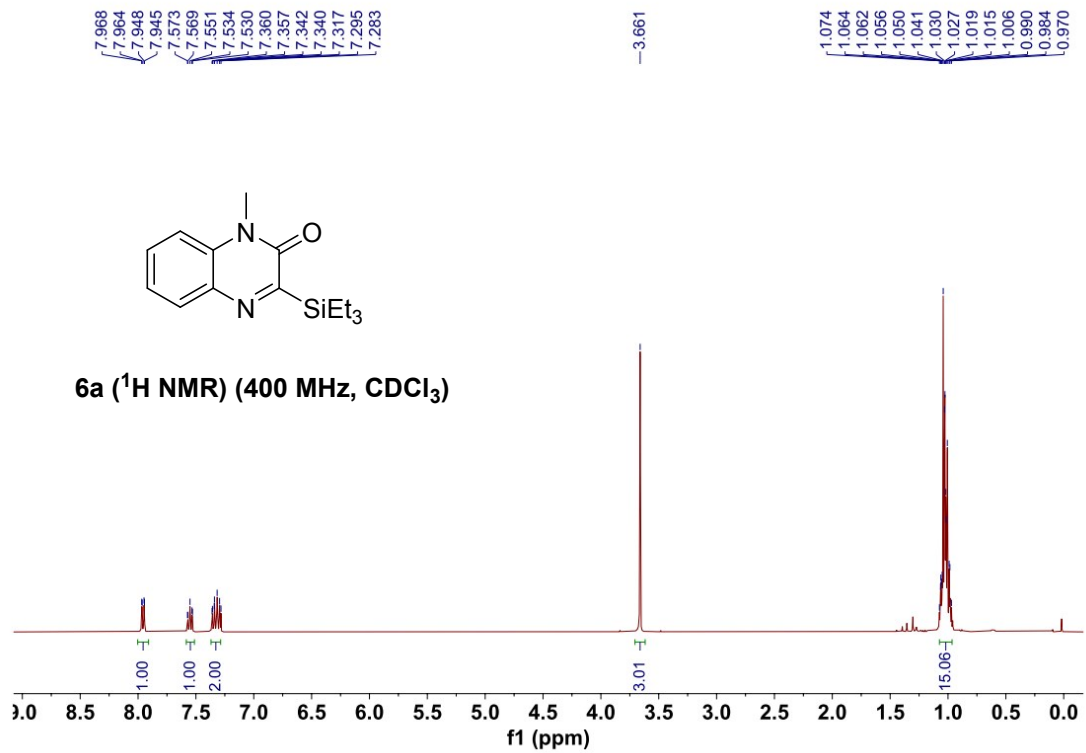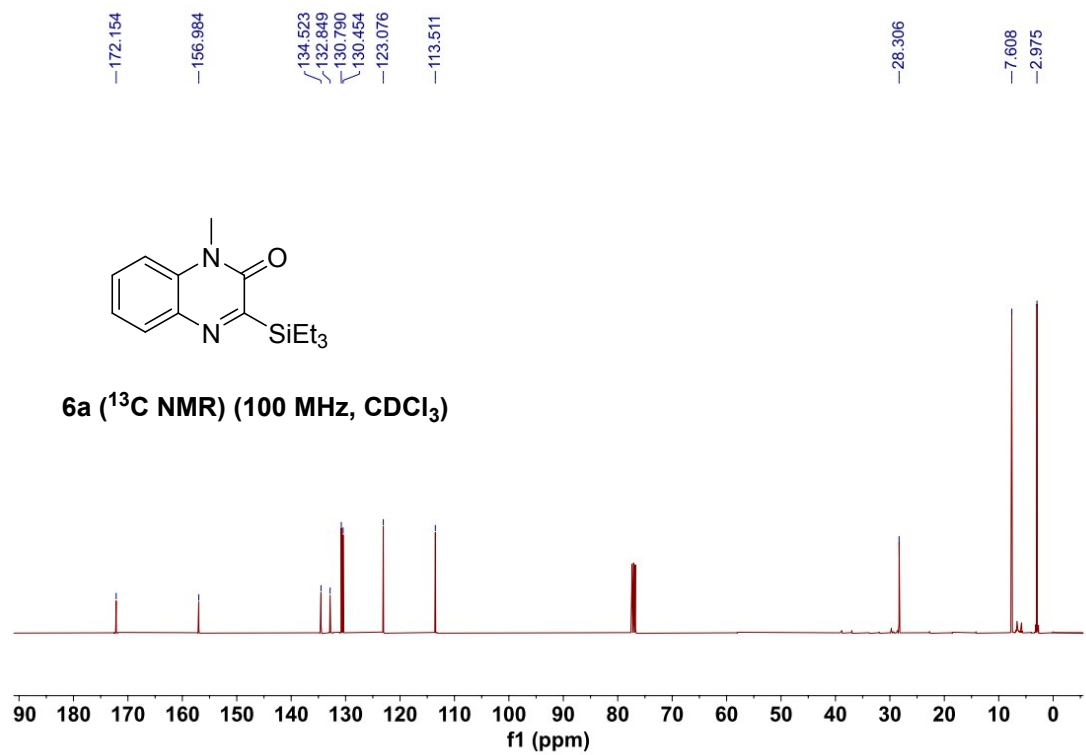

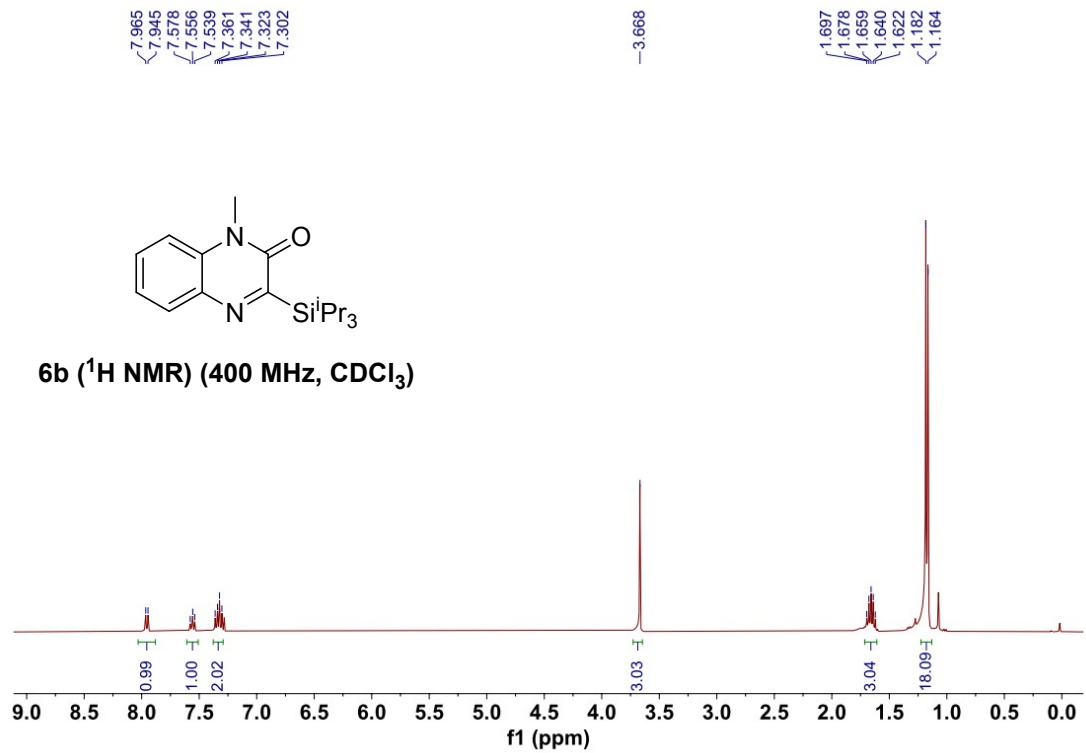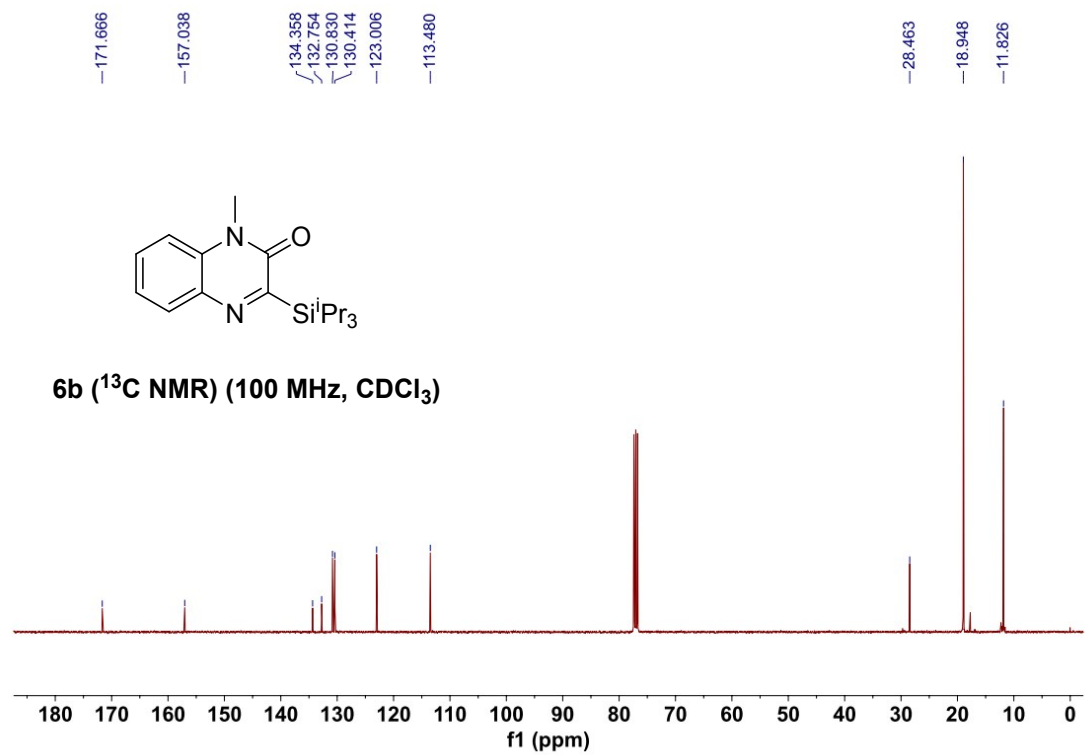

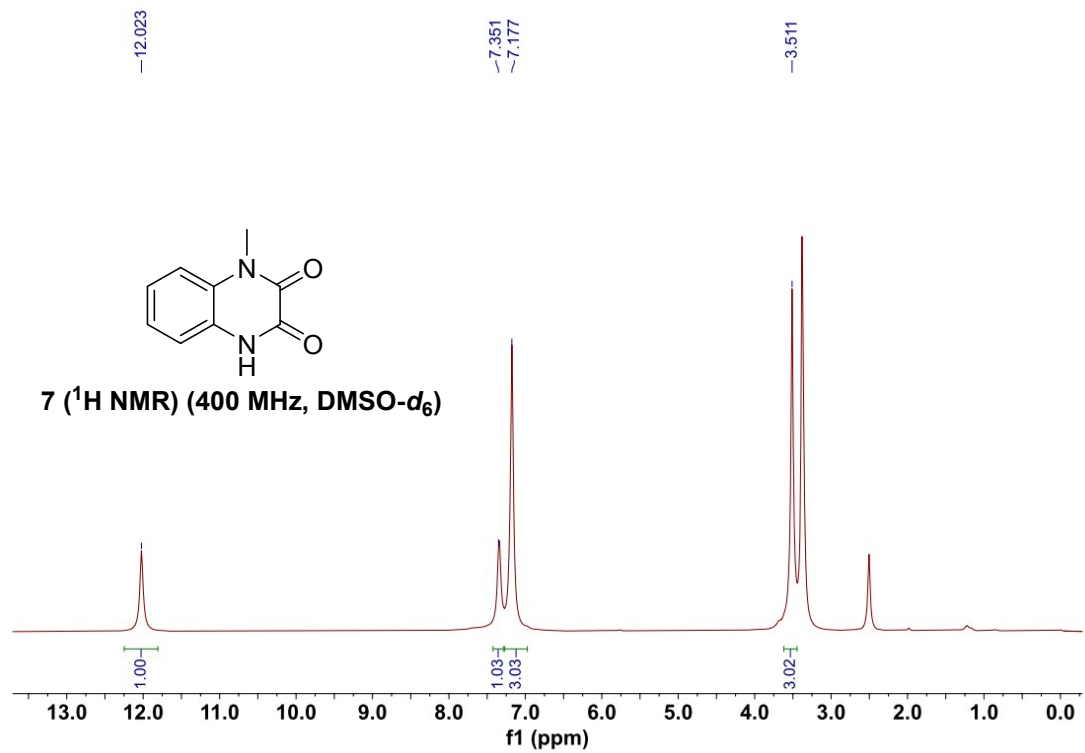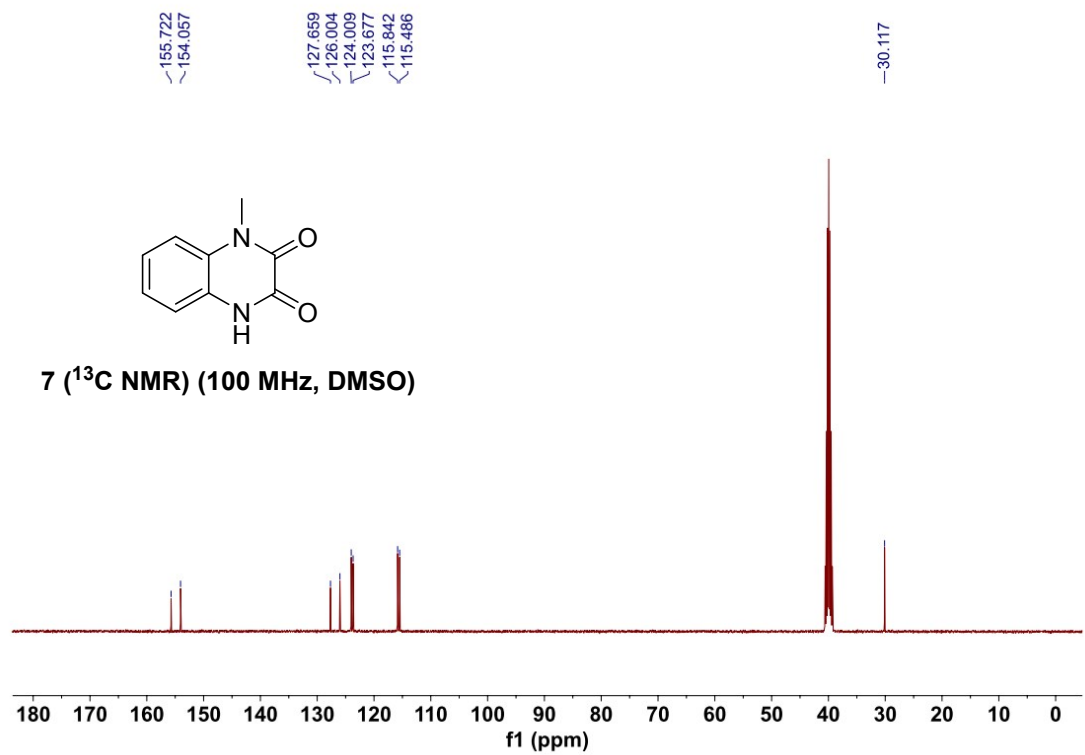

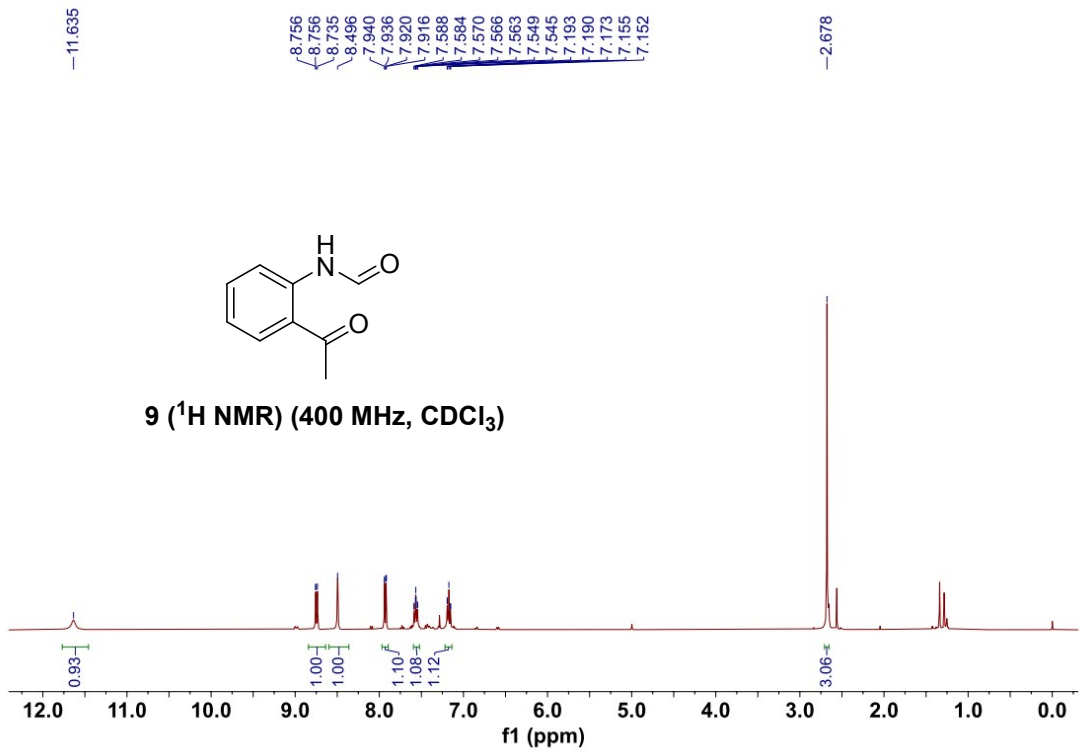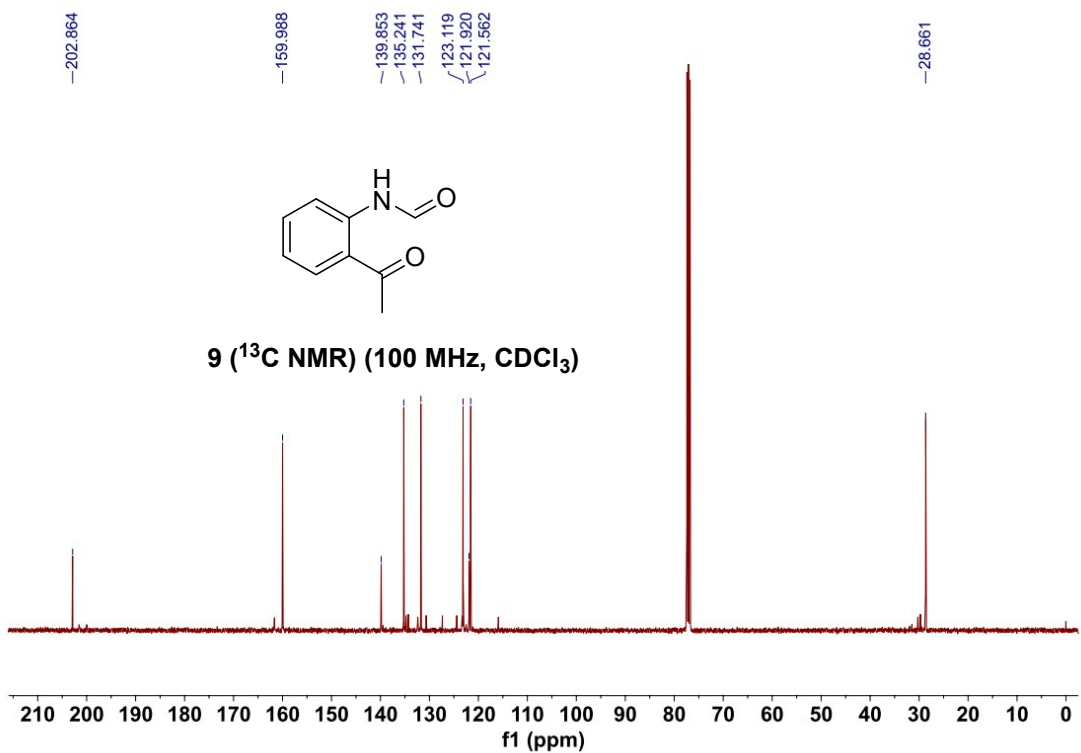

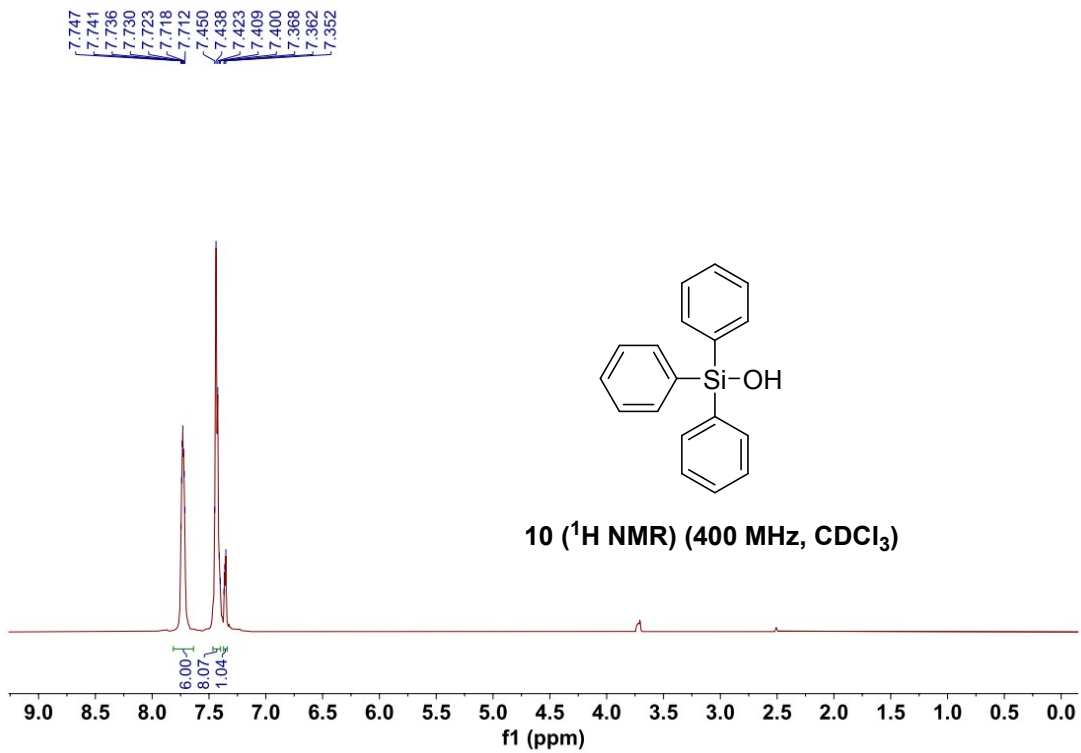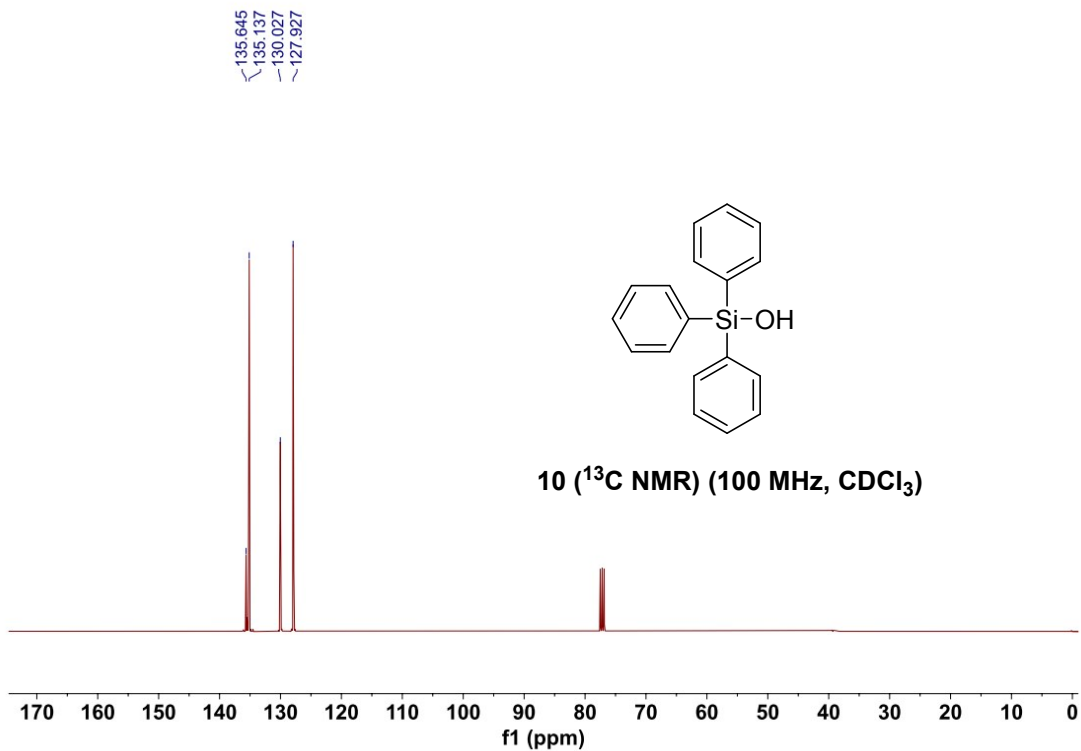

Supplement: d0gc03697h1.pdf [file d0gc03697h1.pdf]
